# Supplementary material for: Active-site loop variations adjust activity and selectivity of the cumene dioxygenase
Source: PubMed Central journal article supplement (PMC7889853; doi:10.1038/s41467-021-21328-8), 2021-02-17
Supplement: 41467_2021_21328_MOESM1_ESM.pdf [file 41467_2021_21328_MOESM1_ESM.pdf]

# **Active-site loop variations adjust activity and selectivity of the cumene dioxygenase**

## **Supplementary Information**

**Peter M. Heinemann<sup>a</sup>, Daniel Armbruster<sup>a</sup> and Bernhard Hauer <sup>a\*</sup>**

<sup>a</sup> Institute of Biochemistry and Technical Biochemistry, Department of Technical Biochemistry, University of Stuttgart, Allmandring 31, 70569 Stuttgart (Germany)

\* Corresponding Author

E-mail address: [bernhard.hauer@itb.uni-stuttgart.de](mailto:bernhard.hauer@itb.uni-stuttgart.de)



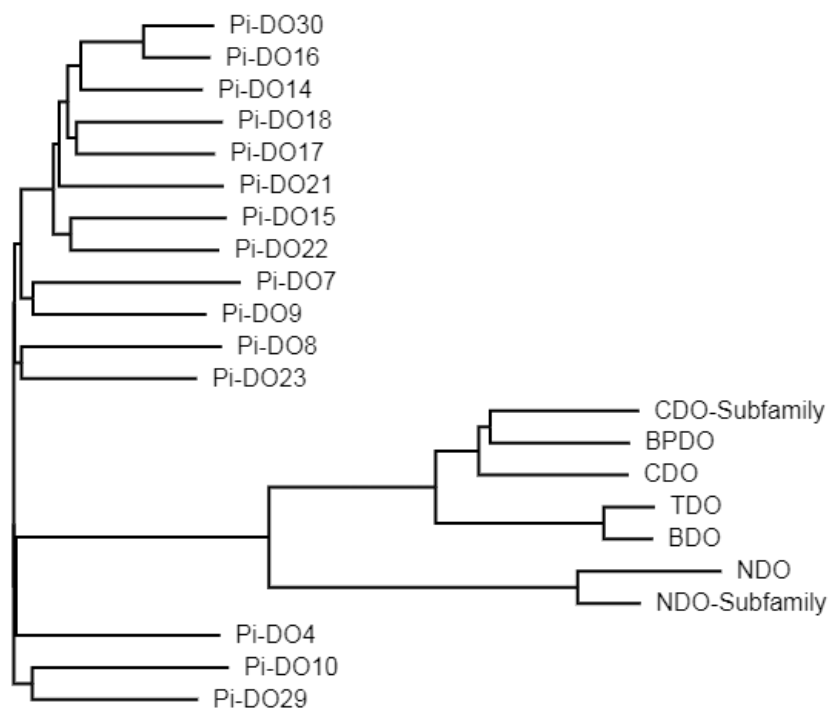

**Supplementary Fig. 2: Phylogenetic tree of the aligned  $\alpha$ -subunits of the oxygenases of CDO, CDO subfamily, BPDO, TDO, BDO, NDO, NDO-subfamily and from *Phenylobacterium immobile* E (Pi-DO).**

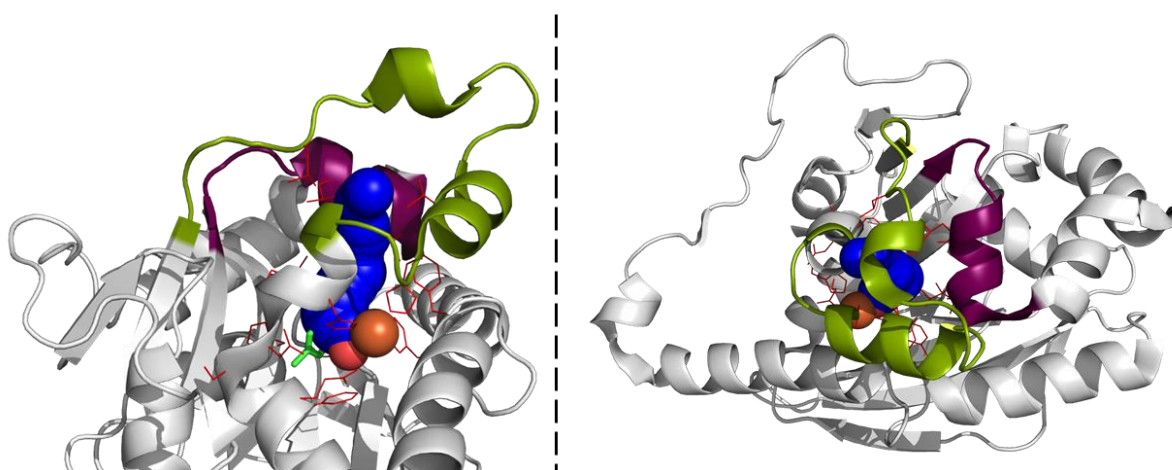

**Supplementary Fig. 3: CAVER analysis of the crystal structure of the  $\alpha$ -subunit of the CDO oxygenase from *Pseudomonas fluorescens* IP01 (PDB entry 1wql).** Side view (left structure) and top view (right structure) of loop 1 (green) and loop 2 (purple) in the crystal structure of one  $\alpha$ -subunit (grey) of the CDO oxygenase (PDB entry 1wql). The simulated tunnel (blue), the catalytically active iron (orange sphere), molecular oxygen (red spheres) and active site residues (red sticks) are shown as well as the docked substrate *R*-limonene (green sticks). Iron was selected as starting point with a tunnel radius of 1.2 Å.

**Supplementary Table 1: Conversions of styrene 1, (*R*)-limonene 2 and 2-phenylpyridine 3 with the Wild-type and the variants obtained from the alanine scan of the CDO.** Biotransformations were performed in technical triplicates and standard deviations (calculated using Excel version 2016) are indicated. Pf: combined product formation in mM. Regioselectivity in %. Source data are provided as a Source Data file.

|           | Pf (mM)      | Selectivity (%) |      | Pf (mM)     | Selectivity (%) |     |     | Pf (mM)     | Selectivity (%) |      |
|-----------|--------------|-----------------|------|-------------|-----------------|-----|-----|-------------|-----------------|------|
|           |              | 1a              | 1b   |             | 2a              | 2b  | 2c  |             | 3a              | 3b   |
| Wild-type | 6.68 ± 0.77  | 86.4            | 13.6 | 3.56 ± 0.44 | 98.8            | 0.7 | 0.5 | 0.64 ± 0.03 | 93.0            | 7.0  |
| G236A     | 10.22 ± 1.07 | 28.4            | 71.6 | 3.77 ± 0.21 | 98.3            | 0.9 | 0.8 | 0.87 ± 0.03 | 91.7            | 8.3  |
| T237A     | 8.63 ± 1.32  | 72.1            | 27.9 | 2.60 ± 0.14 | 97.1            | 1.4 | 1.5 | 0.90 ± 0.02 | 94.9            | 5.1  |
| M238A     | 0 ± 0        | 0.0             | 0.0  | 0.29 ± 0.02 | 100.0           | 0.0 | 0.0 | 0 ± 0       | 0.0             | 0.0  |
| A239G     | 10.07 ± 1.35 | 85.5            | 14.5 | 0.84 ± 0.03 | 98.8            | 1.2 | 0.0 | 0.13 ± 0.01 | 89.2            | 10.8 |
| H240A     | 0 ± 0        | 0.0             | 0.0  | 0 ± 0       | 0.0             | 0.0 | 0.0 | 0 ± 0       | 0.0             | 0.0  |
| L241A     | 10.26 ± 1.80 | 77.0            | 23.0 | 2.44 ± 0.26 | 99.3            | 0.4 | 0.4 | 1.41 ± 0.08 | 92.9            | 7.1  |
| S242A     | 1.56 ± 0.26  | 84.4            | 15.6 | 0.37 ± 0.01 | 97.0            | 0.8 | 2.2 | 0.15 ± 0.01 | 92.3            | 7.7  |
| G243A     | 0.33 ± 0.06  | 32.9            | 67.1 | 0.17 ± 0.00 | 97.0            | 0.0 | 3.0 | 0.07 ± 0.00 | 100.0           | 0.0  |
| V244A     | 0.73 ± 0.11  | 45.9            | 54.1 | 0.22 ± 0.01 | 95.7            | 1.4 | 2.9 | 0.09 ± 0.01 | 89.9            | 10.1 |
| L245A     | 4.94 ± 0.43  | 90.7            | 9.3  | 0.60 ± 0.06 | 97.3            | 0.9 | 1.9 | 0.16 ± 0.01 | 93.5            | 6.5  |
| S246A     | 5.17 ± 0.07  | 89.9            | 10.1 | 1.23 ± 0.02 | 97.6            | 1.5 | 0.9 | 0.17 ± 0.01 | 93.7            | 6.3  |
| S247A     | 2.81 ± 0.17  | 80.7            | 19.3 | 0.56 ± 0.08 | 96.1            | 1.5 | 2.4 | 0.15 ± 0.00 | 93.6            | 6.4  |
| L248A     | 4.42 ± 0.21  | 61.1            | 38.9 | 1.19 ± 0.04 | 97.9            | 0.6 | 1.5 | 0.69 ± 0.06 | 92.7            | 7.3  |
| P249A     | 8.11 ± 1.36  | 79.4            | 20.6 | 3.42 ± 0.02 | 98.8            | 0.5 | 0.7 | 0.79 ± 0.00 | 93.4            | 6.6  |
| P250A     | 6.66 ± 0.30  | 80.8            | 19.2 | 2.81 ± 0.34 | 99.0            | 0.4 | 0.5 | 0.89 ± 0.02 | 93.1            | 6.9  |
| E251A     | 7.00 ± 0.29  | 72.7            | 27.3 | 2.92 ± 0.15 | 99.2            | 0.3 | 0.6 | 0.68 ± 0.02 | 93.1            | 6.9  |
| M252A     | 4.22 ± 0.28  | 77.3            | 22.7 | 3.10 ± 0.53 | 98.7            | 0.7 | 0.7 | 0.66 ± 0.02 | 93.2            | 6.8  |
| D253A     | 3.09 ± 0.35  | 69.5            | 30.5 | 2.44 ± 0.14 | 99.1            | 0.2 | 0.7 | 0.41 ± 0.03 | 95.4            | 4.6  |
| L254A     | 2.32 ± 1.95  | 76.3            | 23.7 | 1.81 ± 0.06 | 99.2            | 0.0 | 0.8 | 0.57 ± 0.04 | 95.1            | 4.9  |

|       |                 |      |       |                |       |      |      |                 |      |      |
|-------|-----------------|------|-------|----------------|-------|------|------|-----------------|------|------|
| S255A | 5.41 ±<br>0.29  | 77.9 | 22.1  | 2.56 ±<br>0.08 | 98.7  | 0.6  | 0.6  | 0.80 ±<br>0.03  | 93.5 | 6.5  |
| Q256A | 6.53 ±<br>0.60  | 79.1 | 20.9  | 2.81 ±<br>0.16 | 99.0  | 0.6  | 0.4  | 0.71 ±<br>0.02  | 93.2 | 6.8  |
| V257A | 6.14 ±<br>0.54  | 69.6 | 30.4  | 2.77 ±<br>0.07 | 98.8  | 0.4  | 0.8  | 0.74 ±<br>0.05  | 95.3 | 4.7  |
| K258A | 1.32 ±<br>0.40  | 77.3 | 22.7  | 2.85 ±<br>0.07 | 98.7  | 0.6  | 0.7  | 0.46 ±<br>0.10  | 92.7 | 7.3  |
| L259A | 2.20 ±<br>0.31  | 93.8 | 6.2   | 2.72 ±<br>0.17 | 97.9  | 0.8  | 1.2  | 0.53 ±<br>0.11  | 92.8 | 7.2  |
| P260A | 0 ± 0           | 0.0  | 0.0   | 1.78 ±<br>0.15 | 97.9  | 1.0  | 1.1  | 0.11 ±<br>0.01  | 84.0 | 16.0 |
| S261A | 0.94 ±<br>0.25  | 74.9 | 25.1  | 2.50 ±<br>0.13 | 98.3  | 0.8  | 0.9  | 0.33 ±<br>0.02  | 89.7 | 10.3 |
| S262A | 1.73 ±<br>0.04  | 87.2 | 12.8  | 0.29 ±<br>0.01 | 100.0 | 0.0  | 0.0  | 0.53 ±<br>0.01  | 92.9 | 7.1  |
| G263A | 0.56 ±<br>0.11  | 0.0  | 100.0 | 3.25 ±<br>0.64 | 99.3  | 0.7  | 0.0  | 0.25 ±<br>0.00  | 87.5 | 12.5 |
| N264A | 3.04 ±<br>0.31  | 87.4 | 12.6  | 2.66 ±<br>0.28 | 100.0 | 0.0  | 0.0  | 0.25 ±<br>0.01  | 92.5 | 7.5  |
| F278A | 14.24 ±<br>0.49 | 75.8 | 24.2  | 3.36 ±<br>0.15 | 99.3  | 0.5  | 0.1  | 2.67 ±<br>0.11  | 85.8 | 14.2 |
| N279A | 14.71 ±<br>1.38 | 73.7 | 26.3  | 2.88 ±<br>0.12 | 97.8  | 1.0  | 1.2  | 1.26 ±<br>0.11  | 92.2 | 7.8  |
| D280A | 16.21 ±<br>0.18 | 76.3 | 23.7  | 3.06 ±<br>0.10 | 99.2  | 0.7  | 0.1  | 1.28 ±<br>0.09  | 93.1 | 6.9  |
| D281A | 14.56 ±<br>0.94 | 12.6 | 87.4  | 1.29 ±<br>0.02 | 93.0  | 2.6  | 4.4  | 1.56 ±<br>0.03  | 89.2 | 10.8 |
| F282A | 12.31 ±<br>2.86 | 95.0 | 5.0   | 4.24 ±<br>0.17 | 100.0 | 0.0  | 0.0  | 9.99 ±<br>0.40  | 98.6 | 1.4  |
| A283G | 5.30 ±<br>0.70  | 70.5 | 29.5  | 2.89 ±<br>0.13 | 98.2  | 0.9  | 0.8  | 1.02 ±<br>0.06  | 93.1 | 6.9  |
| L284A | 5.04 ±<br>0.51  | 27.9 | 72.1  | 2.01 ±<br>0.24 | 61.6  | 20.1 | 18.3 | 1.32 ±<br>0.04  | 90.5 | 9.5  |
| L285A | 4.98 ±<br>0.85  | 15.2 | 84.8  | 0.16 ±<br>0.00 | 100.0 | 0.0  | 0.0  | 0.28 ±<br>0.02  | 83.3 | 16.7 |
| Q286A | 4.87 ±<br>0.84  | 51.1 | 48.9  | 1.32 ±<br>0.01 | 98.7  | 1.3  | 0.0  | 0.36 ±<br>0.02  | 90.7 | 9.3  |
| A287G | 6.42 ±<br>0.11  | 29.5 | 70.5  | 1.29 ±<br>0.10 | 97.8  | 2.2  | 0.0  | 0.38 ±<br>0.02  | 88.2 | 11.8 |
| I288A | 5.06 ±<br>1.12  | 82.2 | 17.8  | 0.45 ±<br>0.03 | 100.0 | 0.0  | 0.0  | 0.48 ±<br>0.01  | 93.5 | 6.5  |
| M289A | 5.63 ±<br>0.56  | 53.3 | 46.7  | 1.94 ±<br>0.09 | 54.1  | 6.2  | 39.8 | 10.05 ±<br>0.13 | 93.3 | 6.7  |
| G290A | 6.57 ±<br>0.37  | 68.8 | 31.2  | 2.75 ±<br>0.26 | 98.8  | 0.6  | 0.6  | 0.35 ±<br>0.02  | 90.1 | 9.9  |

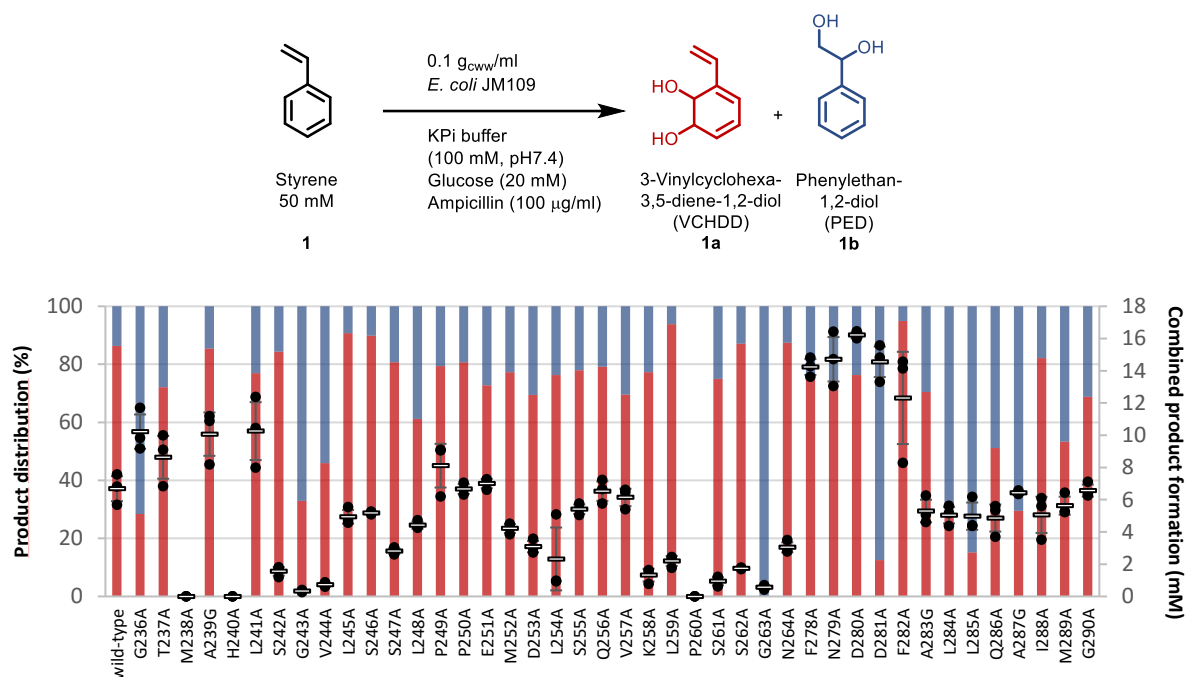

**Supplementary Fig. 4: Product distribution and formation of the two products 3-vinylcyclohexa-3,5-diene-1,2-diol 1a (VCHDD, red, bottom bars) and phenylethan-1,2-diol 1b (PED, blue, top bars) for the biotransformation of styrene with the wild-type and variants obtained from the alanine scan of loop 1 and 2 of the CDO. The reactions were performed in technical triplicates (black dots) with average values (horizontal bar) and standard deviations (calculated using Excel version 2016) indicated. Source data are provided as a Source Data file.**

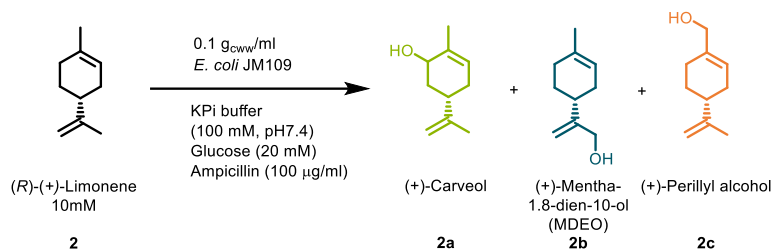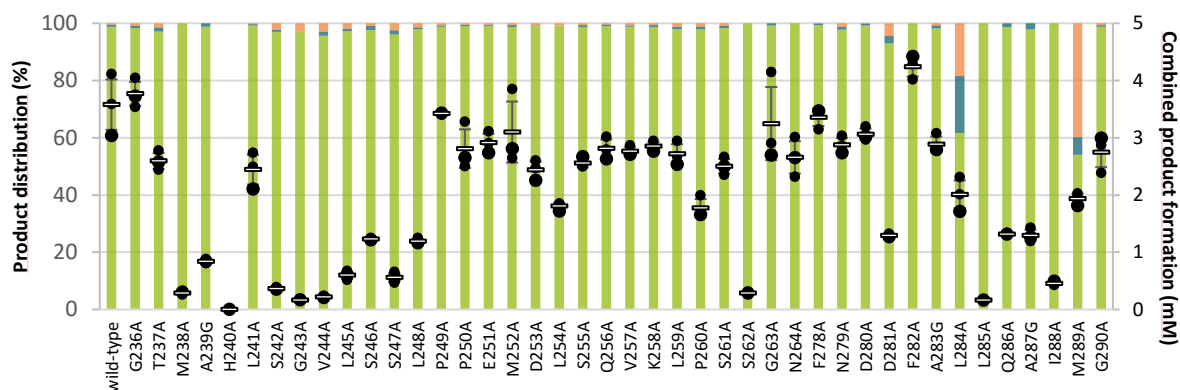

**Supplementary Fig. 5: Product distribution and formation of the products (+)-carveol 2a (green, bottom bars), (+)-mentha-1,8-dien-10-ol 2b (MDEO, blue, middle bars) and (+)-perillyl alcohol 2c (orange, top bars) for the biotransformation of (*R*)-limonene 2 with the wild-type and variants obtained from the alanine scan of loop 1 and 2 of the CDO. The reactions were performed in technical triplicates (black dots) with average values (horizontal bar) and standard deviations (calculated using Excel version 2016) indicated. Source data are provided as a Source Data file.**

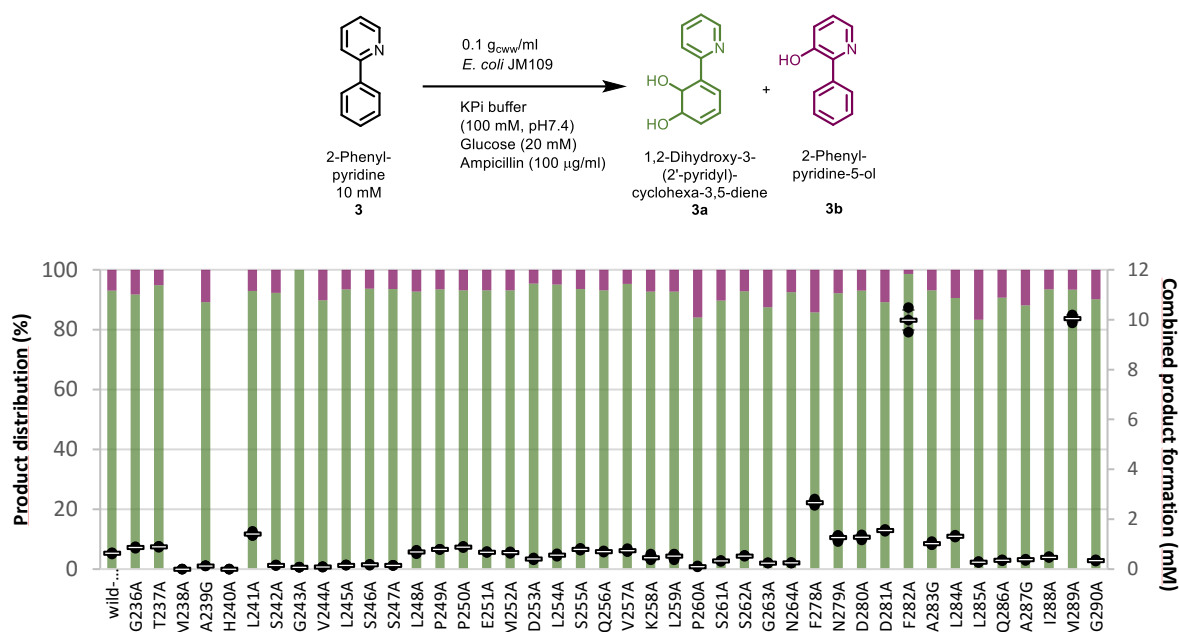

**Supplementary Fig. 6: Product distribution of the products 1,2-dihydroxy-3-(2'-pyridyl)cyclohexa-3,5-diene 3a (green, bottom bars) and 2-phenylpyridine-5-ol 3b (purple, top bars) for the biotransformation of 2-phenylpyridine 3 with the wild-type and variants obtained from the alanine scan of loop 1 and 2 of the CDO. The reactions were performed in technical triplicates (black dots) with average values (horizontal bar) and standard deviations (calculated using Excel version 2016) indicated. Source data are provided as a Source Data file.**



**Supplementary Table 2: Conversion of styrene 1, (*R*)-limonene 2 and 2-phenylpyridine 3 with the Wild-type and selected saturation variants.** Biotransformations were performed in technical triplicates and standard deviation (calculated using Excel version 2016) are indicated. Pf: combined product formation in mM. Regioselectivity in %. Source data are provided as a Source Data file.

|           | Pf (mM)     | Selectivity (%) |       | Pf (mM)     | Selectivity (%) |      |      | Pf (mM)     | Selectivity (%) |      |
|-----------|-------------|-----------------|-------|-------------|-----------------|------|------|-------------|-----------------|------|
|           |             | 1a              | 1b    |             | 2a              | 2b   | 2c   |             | 3a              | 3b   |
| Wild-type | 6.68 ± 0.77 | 86.4            | 13.6  | 3.58 ± 0.44 | 98.8            | 0.7  | 0.5  | 0.64 ± 0.03 | 93.0            | 7.0  |
| F278V     | 0.24 ± 0.07 | 100.0           | 0.0   | 5.31 ± 0.79 | 100.0           | 0.0  | 0.0  | 1.57 ± 0.04 | 94.1            | 5.9  |
| F282V     | 1.31 ± 0.06 | 69.4            | 30.6  | 5.15 ± 0.28 | 100.0           | 0.0  | 0.0  | 1.28 ± 0.02 | 97.0            | 3.0  |
| F282T     | 0.05 ± 0.00 | 100.0           | 0.0   | 2.78 ± 0.24 | 100.0           | 0.0  | 0.0  | 9.82 ± 0.20 | 97.3            | 2.7  |
| L284G     | 0.31 ± 0.08 | 84.7            | 15.3  | 2.08 ± 0.19 | 30.8            | 19.4 | 49.7 | 0.74 ± 0.04 | 91.4            | 8.6  |
| Q286F     | 0.65 ± 0.05 | 67.5            | 32.5  | 1.86 ± 0.16 | 100.0           | 0.0  | 0.0  | 0.40 ± 0.05 | 93.8            | 6.2  |
| I288S     | 0.02 ± 0.03 | 41.6            | 58.4  | 1.31 ± 0.41 | 69.9            | 3.5  | 26.5 | 1.11 ± 0.03 | 93.3            | 6.7  |
| I288T     | 0.10 ± 0.01 | 73.9            | 26.1  | 2.14 ± 0.20 | 96.4            | 0.1  | 3.4  | 1.96 ± 0.02 | 93.6            | 6.4  |
| M289K     | 0.09 ± 0.01 | 0.0             | 100.0 | 0.06 ± 0.00 | 100.0           | 0.0  | 0.0  | 0.15 ± 0.01 | 86.7            | 13.3 |

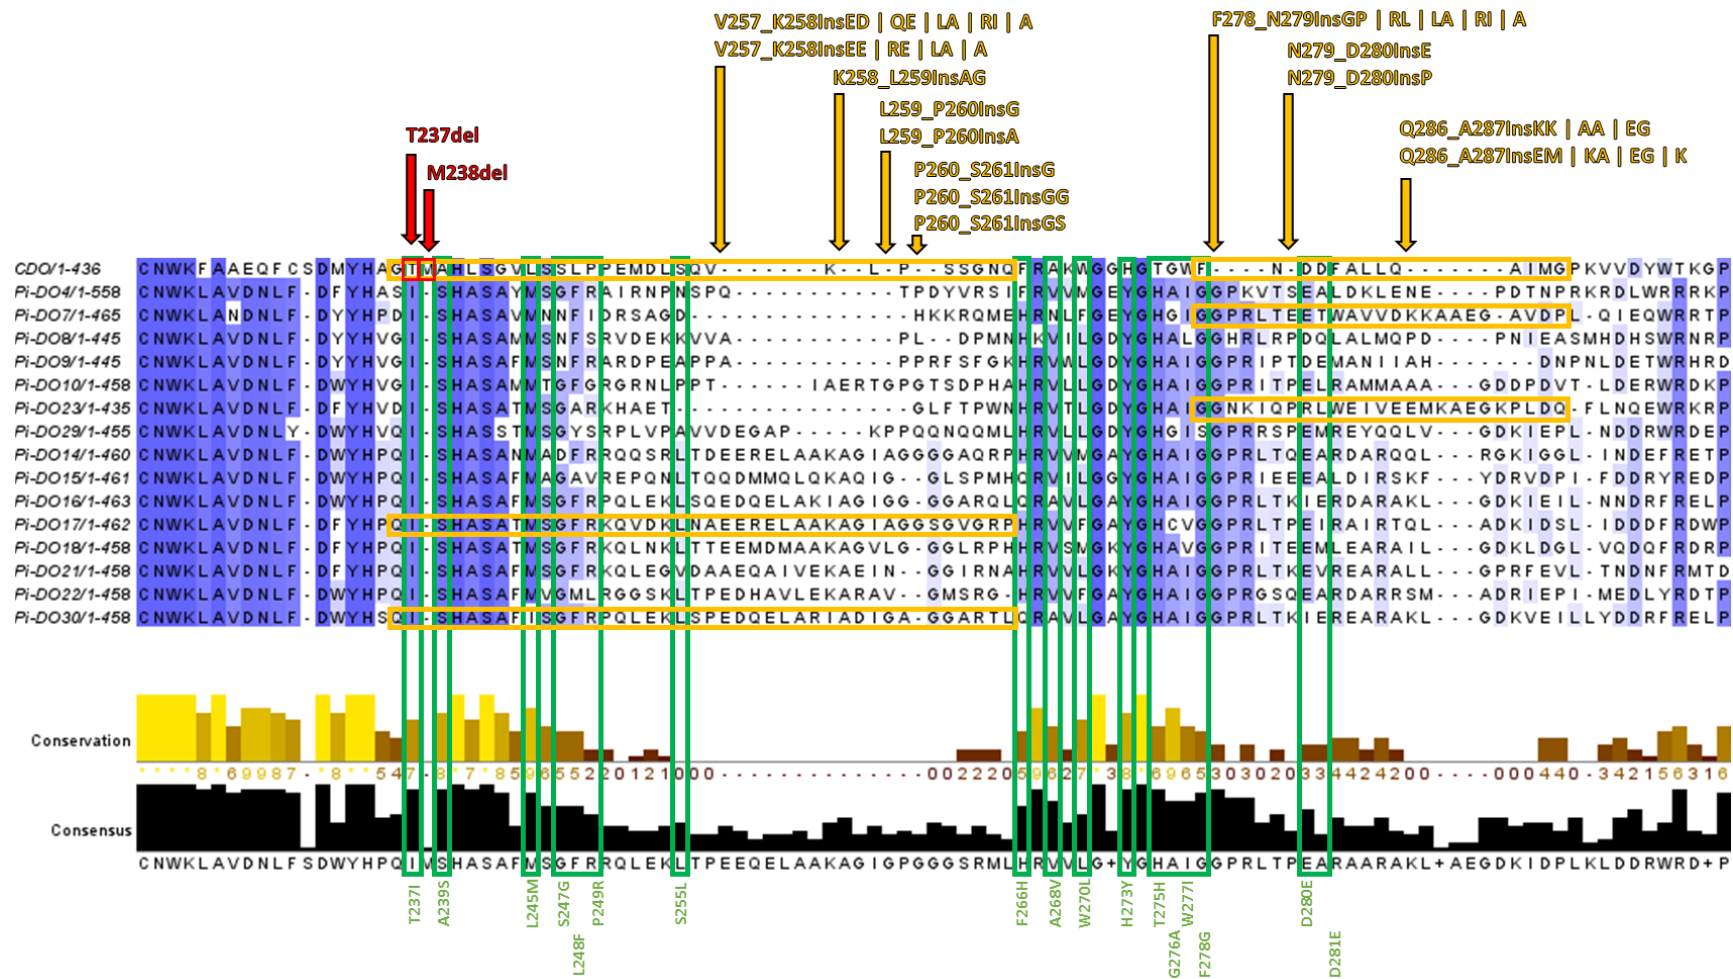

**Supplementary Fig. 7: Excerpt of the sequence alignment of CDO with  $\alpha$ -subunits of the oxygenases from *Phenylobacterium immobile* E and variant selection for the adaption library.** Single point mutations are indicated in green, single point deletions in red. Introduced sequence-alignment based insertions are highlighted in yellow, the loops 1 and 2 of the CDO together with the longest corresponding loops from oxygenases originated from *Phenylobacterium immobile* E are framed in yellow. Slashes in the variant designation represent stepwise insertions

**Supplementary Table 3: Conversions of styrene 1, (*R*)-limonene 2 and 2-phenylpyridine 3 with the wild-type, and deletion and single-point mutation variants based on loops in oxygenases from *Phenylbacterium immobile* E. Biotransformations were performed in technical triplicates and standard deviation (calculated using Excel version 2016) are indicated. Pf: combined product formation in mM. Regioselectivity in %. Source data are provided as a Source Data file.**

|           | Pf (mM)      | Selectivity (%) |      | Pf (mM)     | Selectivity (%) |     |     | Pf (mM)     | Selectivity (%) |      |
|-----------|--------------|-----------------|------|-------------|-----------------|-----|-----|-------------|-----------------|------|
|           |              | 1a              | 1b   |             | 2a              | 2b  | 2c  |             | 3a              | 3b   |
| Wild-type | 6.68 ± 0.77  | 86.4            | 13.6 | 3.58 ± 0.44 | 98.8            | 0.7 | 0.5 | 0.64 ± 0.03 | 93.0            | 7.0  |
| T237del   | 0 ± 0        | 0.0             | 0.0  | 0 ± 0       | 0.0             | 0.0 | 0.0 | 0 ± 0       | 0.0             | 0.0  |
| M238del   | 0 ± 0        | 0.0             | 0.0  | 0.12 ± 0.00 | 100.0           | 0.0 | 0.0 | 0 ± 0       | 0.0             | 0.0  |
| T237I     | 7.99 ± 0.13  | 78.5            | 21.5 | 0.44 ± 0.03 | 100.0           | 0.0 | 0.0 | 0.06 ± 0.01 | 100.0           | 0.0  |
| A239S     | 6.89 ± 0.21  | 69.8            | 30.2 | 0.86 ± 0.02 | 97.4            | 0.8 | 1.8 | 0.55 ± 0.02 | 91.0            | 9.0  |
| L245M     | 0 ± 0        | 0.0             | 0.0  | 0.10 ± 0.00 | 100.0           | 0.0 | 0.0 | 0 ± 0       | 0.0             | 0.0  |
| S247G     | 0 ± 0        | 0.0             | 0.0  | 0 ± 0       | 0.0             | 0.0 | 0.0 | 0 ± 0       | 0.0             | 0.0  |
| L248F     | 0 ± 0        | 0.0             | 0.0  | 0 ± 0       | 0.0             | 0.0 | 0.0 | 0 ± 0       | 0.0             | 0.0  |
| P249R     | 0 ± 0        | 0.0             | 0.0  | 0 ± 0       | 0.0             | 0.0 | 0.0 | 0 ± 0       | 0.0             | 0.0  |
| S255L     | 5.35 ± 0.10  | 71.8            | 28.2 | 0.58 ± 0.02 | 96.7            | 2.3 | 1.0 | 0.05 ± 0.01 | 81.4            | 18.6 |
| F266H     | 8.14 ± 0.42  | 75.8            | 24.2 | 1.38 ± 0.02 | 98.0            | 0.9 | 1.1 | 0.11 ± 0.01 | 86.6            | 13.4 |
| A268V     | 4.18 ± 0.07  | 73.6            | 26.4 | 0.84 ± 0.06 | 97.4            | 1.9 | 0.7 | 0 ± 0       | 0.0             | 0.0  |
| W270L     | 2.52 ± 0.12  | 84.4            | 15.6 | 2.74 ± 0.41 | 99.1            | 0.4 | 0.5 | 0.22 ± 0.02 | 92.4            | 7.6  |
| H273Y     | 0 ± 0        | 0.0             | 0.0  | 0.14 ± 0.00 | 100.0           | 0.0 | 0.0 | 0 ± 0       | 0.0             | 0.0  |
| T275H     | 1.46 ± 0.07  | 84.4            | 15.6 | 1.39 ± 0.02 | 99.2            | 0.4 | 0.5 | 0.51 ± 0.01 | 95.4            | 4.6  |
| G276A     | 0 ± 0        | 0.0             | 0.0  | 1.22 ± 0.06 | 100.0           | 0.0 | 0.0 | 0.19 ± 0.01 | 92.1            | 7.9  |
| W277I     | 0 ± 0        | 0.0             | 0.0  | 0 ± 0       | 0.0             | 0.0 | 0.0 | 0 ± 0       | 0.0             | 0.0  |
| F278G     | 0.93 ± 0.13  | 75.5            | 24.5 | 2.12 ± 0.05 | 96.7            | 0.9 | 2.4 | 0.49 ± 0.02 | 86.2            | 13.8 |
| D280E     | 2.24 ± 0.04  | 89.1            | 10.9 | 3.21 ± 0.18 | 99.5            | 0.5 | 0.0 | 0.37 ± 0.01 | 93.4            | 6.6  |
| D281E     | 14.25 ± 0.49 | 55.9            | 44.1 | 0.64 ± 0.03 | 100.0           | 0.0 | 0.0 | 0.07 ± 0.01 | 90.9            | 9.1  |

**Supplementary Table 4: Conversions of styrene 1, (R)-limonene 2 and 2-phenylpyridine 3 with the wild-type and insertion variants based on loops in oxygenases from *Phenylobacterium immobile* E.** Biotransformations were performed in technical triplicates and standard deviations (calculated using Excel version 2016) are indicated. Pf: combined product formation in mM. Regioselectivity in %. Source data are provided as a Source Data file.

|                         | Pf (mM)        | Selectivity (%) |       | Pf (mM)      | Selectivity (%) |     |     | Pf (mM)     | Selectivity (%) |      |
|-------------------------|----------------|-----------------|-------|--------------|-----------------|-----|-----|-------------|-----------------|------|
|                         |                | 1a              | 1b    |              | 2a              | 2b  | 2c  |             | 3a              | 3b   |
| Wild-type               | 6.68 ± 0.77    | 86.4            | 13.6  | 3.58 ± 0.44  | 98.8            | 0.7 | 0.5 | 0.64 ± 0.03 | 93.0            | 7.0  |
| V257_K258 insED         | 12.81 ± 1.50   | 79.7            | 20.3  | 7.81 ± 0.31  | 98.4            | 0.7 | 0.9 | 0.64 ± 0.05 | 92.8            | 7.2  |
| V257_K258 insEDQE       | 4.42 ± 0.50    | 79.9            | 20.1  | 0.44 ± 0.01  | 97.3            | 1.2 | 1.5 | 0.08 ± 0.01 | 89.8            | 10.2 |
| V257_K258 insEDQELA     | 5.25 ± 0.74    | 82.3            | 17.7  | 0.314 ± 0.00 | 95.0            | 3.2 | 1.8 | 0.09 ± 0.01 | 90.1            | 9.9  |
| V257_K258 insEDQELA RI  | 8.78293 ± 0.86 | 81.0            | 19.0  | 2.75 ± 0.19  | 98.6            | 0.8 | 0.6 | 0.42 ± 0.02 | 94.9            | 5.1  |
| V257_K258 insEDQELA RIA | 8.61 ± 0.68    | 81.3            | 18.7  | 0.77 ± 0.02  | 100.0           | 0.0 | 0.0 | 0.38 ± 0.12 | 94.7            | 5.3  |
| L259_P260 insG          | 6.68 ± 0.15    | 72.6            | 27.4  | 0.62 ± 0.01  | 97.0            | 0.0 | 3.0 | 0.12 ± 0.00 | 91.2            | 8.8  |
| P260_S261 insG          | 11.23 ± 0.29   | 78.6            | 21.4  | 1.22 ± 0.01  | 98.7            | 1.3 | 0.0 | 0.10 ± 0.01 | 92.5            | 7.5  |
| V257_K258 insEE         | 13.81 ± 0.15   | 46.5            | 53.5  | 1.37 ± 0.04  | 97.2            | 0.9 | 2.0 | 0.10 ± 0.01 | 91.7            | 8.3  |
| V257_K258 insEERE       | 1.86 ± 0.11    | 64.0            | 36.0  | 0.12 ± 0.01  | 100.0           | 0.0 | 0.0 | 0 ± 0       | 0.0             | 0.0  |
| V257_K258 insEERELA     | 4.88 ± 0.07    | 77.2            | 22.8  | 0.43 ± 0.03  | 92.1            | 3.9 | 4.0 | 0.12 ± 0.01 | 90.2            | 9.8  |
| V257_K258 insEERELA A   | 13.14 ± 0.82   | 84.9            | 15.1  | 6.39 ± 0.23  | 98.4            | 0.7 | 1.0 | 1.97 ± 0.13 | 96.2            | 3.8  |
| K258_L259 insAG         | 17.75 ± 0.91   | 56.3            | 43.7  | 0.35 ± 0.01  | 100.0           | 0.0 | 0.0 | 0.26 ± 0.01 | 91.7            | 8.3  |
| L259_P260 insA          | 22.06 ± 1.51   | 76.4            | 23.6  | 5.55 ± 0.46  | 96.3            | 1.7 | 1.9 | 1.05 ± 0.07 | 92.5            | 7.5  |
| P260_S261 insGS         | 0 ± 0          | 0.0             | 0.0   | 0.092 ± 0.01 | 100.0           | 0.0 | 0.0 | 0 ± 0       | 0.0             | 0.0  |
| P260_S261 insGG         | 10.55 ± 0.27   | 66.2            | 33.8  | 0.63 ± 0.27  | 100.0           | 0.0 | 0.0 | 0.07 ± 0.01 | 92.3            | 7.7  |
| N279_D280 insE          | 23.72 ± 1.59   | 67.5            | 32.5  | 2.65 ± 0.07  | 100.0           | 0.0 | 0.0 | 1.03 ± 0.10 | 91.9            | 8.1  |
| Q286_A287 insKK         | 0.83 ± 0.05    | 0.0             | 100.0 | 0.10 ± 0.00  | 100.0           | 0.0 | 0.0 | 0 ± 0       | 0.0             | 0.0  |
| Q286_A287 insKKAA       | 0 ± 0          | 0.0             | 0.0   | 0 ± 0        | 0.0             | 0.0 | 0.0 | 0 ± 0       | 0.0             | 0.0  |
| Q286_A287 insKKAAEG     | 0.64 ± 0.02    | 12.2            | 87.8  | 0.12 ± 0.01  | 100.0           | 0.0 | 0.0 | 0 ± 0       | 0.0             | 0.0  |

|                             |                  |      |      |                |       |     |     |                |      |      |
|-----------------------------|------------------|------|------|----------------|-------|-----|-----|----------------|------|------|
| F278_N279<br>insGP          | 0 ± 0            | 0.0  | 0.0  | 0.19 ±<br>0.02 | 100.0 | 0.0 | 0.0 | 0 ± 0          | 0.0  | 0.0  |
| F278_N279<br>insGPRL        | 17.28 ±<br>0.23  | 45.3 | 54.7 | 0.10 ±<br>0.01 | 100.0 | 0.0 | 0.0 | 0.85 ±<br>0.01 | 93.2 | 6.8  |
| N279_D280<br>insP           | 13.437<br>± 0.63 | 38.1 | 61.9 | 1.74 ±<br>0.04 | 91.2  | 3.6 | 5.3 | 0.12 ±<br>0.02 | 84.1 | 15.9 |
| Q286_A287<br>insEM          | 0 ± 0            | 0.0  | 0.0  | 0.85 ±<br>0.04 | 93.5  | 2.7 | 3.8 | 0 ± 0          | 0.0  | 0.0  |
| Q286_A287<br>insEMKA        | 9.59 ±<br>0.10   | 68.4 | 31.6 | 0.16 ±<br>0.02 | 100.0 | 0.0 | 0.0 | 0.04 ±<br>0.00 | 82.8 | 17.2 |
| Q286_A287<br>insEMKAE<br>G  | 1.81 ±<br>0.14   | 8.2  | 91.8 | 0.13 ±<br>0.01 | 100.0 | 0.0 | 0.0 | 0.03 ±<br>0.02 | 75.7 | 24.3 |
| Q286_A287<br>insEMKAE<br>GK | 0 ± 0            | 0.0  | 0.0  | 0.03 ±<br>0.00 | 100.0 | 0.0 | 0.0 | 0.17 ±<br>0.01 | 84.8 | 15.2 |

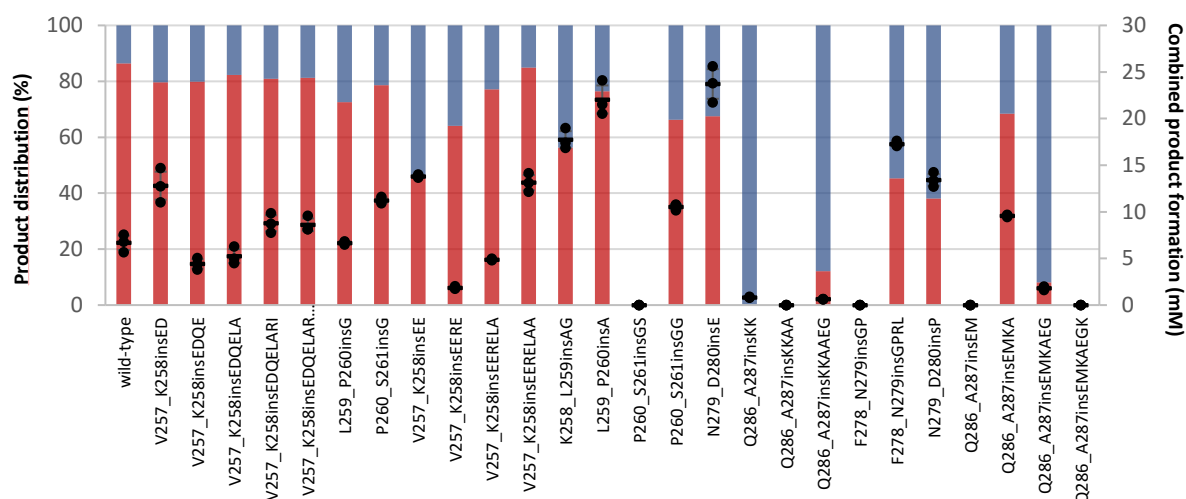

**Supplementary Fig. 8: Product distribution and formation of the two products 3-vinylcyclohexa-3,5-diene-1,2-diol 1a (VCHDD, red, bottom bars) and phenylethan-1,2-diol 1b (PED, blue, top bars) for the biotransformation of styrene with the wild-type and insertion variants based on loops in oxygenases from *Phenyllobacterium immobile* E.** The reactions were performed in technical triplicates (black dots) with average values (horizontal bar) and standard deviations (calculated using Excel version 2016) indicated. Source data are provided as a Source Data file.

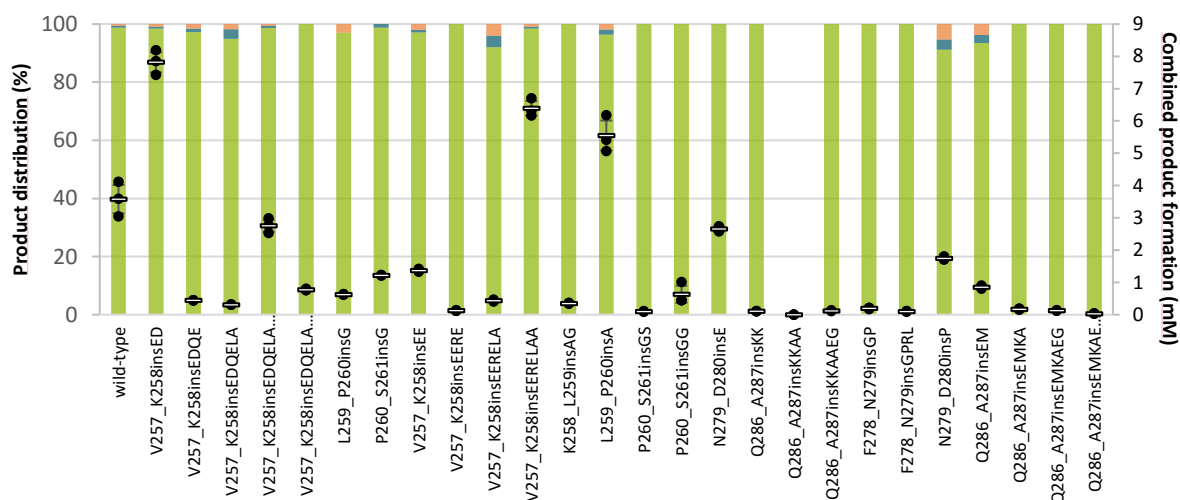

**Supplementary Fig. 9: Product distribution and formation of the products (+)-carveol 2a (green, bottom bars), (+)-mentha-1,8-dien-10-ol 2b (MDEO, blue, middle bars) and (+)-perillyl alcohol 2c (orange, top bars) for the biotransformation of (*R*)-limonene 2 with the wild-type and insertion variants based on loops in oxygenases from *Phenyllobacterium immobile* E.** The reactions were performed in technical triplicates (black dots) with average values (horizontal bar) and standard deviations (calculated using Excel version 2016) indicated. Source data are provided as a Source Data file.

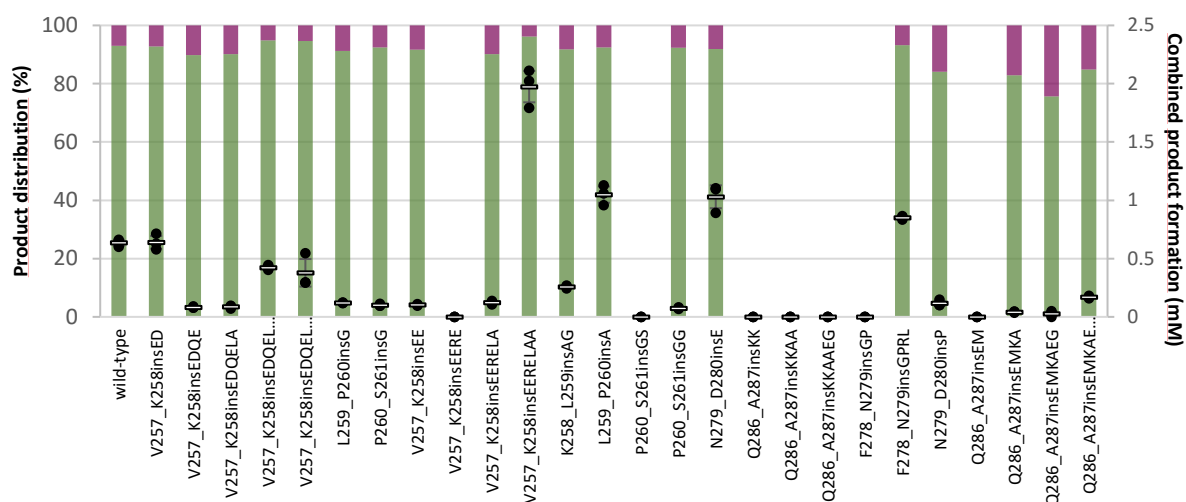

**Supplementary Fig. 10: Product distribution and formation of the products 1,2-dihydroxy-3-(2'-pyridyl)cyclohexa-3,5-diene 3a (green, bottom bars) and 2-phenylpyridine-5-ol 3b (purple, top bars) for the biotransformation of 2-phenylpyridine 3 with the wild-type and insertion variants based on loops in oxygenases from in *Phenylbacterium immobile* E.** The reactions were performed in technical triplicates (black dots) with average values (horizontal bar) and standard deviations (calculated using Excel version 2016) indicated. Source data are provided as a Source Data file.

**Supplementary Table 5: Conversions of styrene 1, (*R*)-limonene 2 and 2-phenylpyridine 3 with the wild-type and deletion variants.** Biotransformations were performed in technical triplicates and standard deviations (calculated using Excel version 2016) are indicated. Pf: combined product formation in mM. Regioselectivity in %. Source data are provided as a Source Data file.

|               | Pf (mM)      | Selectivity (%) |      | Pf (mM)     | Selectivity (%) |     |     | Pf (mM)      | Selectivity (%) |     |
|---------------|--------------|-----------------|------|-------------|-----------------|-----|-----|--------------|-----------------|-----|
|               |              | 1a              | 1b   |             | 2a              | 2b  | 2c  |              | 3a              | 3b  |
| Wild-type     | 6.68 ± 0.77  | 86.4            | 13.6 | 3.58 ± 0.44 | 98.8            | 0.7 | 0.5 | 0.64 ± 0.03  | 93.0            | 7.0 |
| E251del       | 13.14 ± 2.74 | 84.5            | 15.5 | 3.38 ± 0.21 | 97.2            | 1.3 | 1.5 | 2.18 ± 0.21  | 94.7            | 5.3 |
| P250_M252 del | 12.57 ± 2.20 | 82.4            | 17.6 | 2.01 ± 0.16 | 96.3            | 1.6 | 2.1 | 2.74 ± 0.10  | 94.2            | 5.8 |
| L248_L254 del | 0 ± 0        | 0.0             | 0.0  | 0.17 ± 0.00 | 100.0           | 0.0 | 0.0 | 0 ± 0        | 0.0             | 0.0 |
| V257del       | 13.36 ± 0.54 | 77.1            | 22.9 | 2.57 ± 0.16 | 96.6            | 1.2 | 2.1 | 2.49 ± 0.049 | 93.6            | 6.4 |
| Q256_K258 del | 15.26 ± 0.56 | 44.1            | 55.9 | 3.68 ± 0.16 | 97.4            | 1.1 | 1.6 | 1.96 ± 0.04  | 91.5            | 8.5 |
| L254_P260 del | 0 ± 0        | 0.0             | 0.0  | 0.04 ± 0.00 | 100.0           | 0.0 | 0.0 | 0 ± 0        | 0.0             | 0.0 |
| A283del       | 15.82 ± 1.99 | 89.2            | 10.8 | 8.92 ± 0.80 | 98.2            | 0.8 | 1.0 | 10.16 ± 0.47 | 98.7            | 1.3 |
| F282_L284 del | 19.93 ± 1.97 | 6.3             | 93.7 | 0.60 ± 0.02 | 100.0           | 0.0 | 0.0 | 3.68 ± 0.11  | 93.0            | 7.0 |
| D280_Q286 del | 0 ± 0        | 0.0             | 0.0  | 0 ± 0       | 0.0             | 0.0 | 0.0 | 0 ± 0        | 0.0             | 0.0 |



**Supplementary Table 6: Conversions of styrene 1, (*R*)-limonene 2 and 2-phenylpyridine 3 with the wild-type and insertion variants after V257 based on LILI.** Biotransformations were performed in technical triplicates and standard deviations (calculated using Excel version 2016) are indicated. Pf: combined product formation in mM. Regioselectivity in %. Source data are provided as a Source Data file.

|                      | Pf (mM)     | Selectivity (%) |      | Pf (mM)      | Selectivity (%) |     |     | Pf (mM)     | Selectivity (%) |     |
|----------------------|-------------|-----------------|------|--------------|-----------------|-----|-----|-------------|-----------------|-----|
|                      |             | 1a              | 1b   |              | 2a              | 2b  | 2c  |             | 3a              | 3b  |
| Wild-type            | 6.68 ± 0.77 | 86.4            | 13.6 | 3.58 ± 0.44  | 98.8            | 0.7 | 0.5 | 0.64 ± 0.03 | 93.0            | 7.0 |
| V257_K258 insGG      | 0 ± 0       | 0.0             | 0.0  | 1.96 ± 0.11  | 97.6            | 1.2 | 1.2 | 0.61 ± 0.00 | 92.2            | 7.8 |
| V257_K258 insGGG     | 0.07 ± 0.01 | 100.0           | 0.0  | 1.49 ± 0.11  | 98.8            | 1.2 | 0.0 | 0.48 ± 0.01 | 92.1            | 7.9 |
| V257_K258 insGGGG    | 0.22 ± 0.07 | 100.0           | 0.0  | 1.61 ± 0.14  | 98.9            | 1.1 | 0.0 | 0.52 ± 0.02 | 92.5            | 7.5 |
| V257_K258 insGGGGG   | 0.49 ± 0.22 | 94.8            | 5.2  | 1.32 ± 0.08  | 98.6            | 1.4 | 0.0 | 0.51 ± 0.01 | 92.1            | 7.9 |
| V257_K258 insGGGGG G | 0.17 ± 0.09 | 100.0           | 0.0  | 1.32 ± 0.08  | 99.8            | 0.2 | 0.0 | 0.37 ± 0.03 | 92.8            | 7.2 |
| V257_K258 insGS      | 0.05 ± 0.02 | 100.0           | 0.0  | 2.22 ± 0.04  | 98.8            | 1.2 | 0.0 | 0.77 ± 0.05 | 92.6            | 7.4 |
| V257_K258 insGSG     | 0.22 ± 0.10 | 95.6            | 4.4  | 1.19 ± 0.27  | 98.8            | 1.2 | 0.0 | 0.41 ± 0.01 | 91.6            | 8.4 |
| V257_K258 insGSGS    | 0.09 ± 0.03 | 100.0           | 0.0  | 1.13 ± 0.01  | 100.0           | 0.0 | 0.0 | 0.43 ± 0.02 | 92.7            | 7.3 |
| V257_K258 insGSGSG   | 0.87 ± 0.11 | 94.1            | 5.9  | 1.75 ± 0.47  | 99.4            | 0.6 | 0.0 | 0.58 ± 0.05 | 93.1            | 6.9 |
| V257_K258 insGSGSGS  | 0.41 ± 0.29 | 11.3            | 88.7 | 1.126 ± 0.16 | 100.0           | 0.0 | 0.0 | 0.52 ± 0.03 | 92.5            | 7.5 |
| V257_K258 insPA      | 0.03 ± 0.04 | 100.0           | 0.0  | 0.95 ± 0.04  | 100.0           | 0.0 | 0.0 | 0.31 ± 0.03 | 92.9            | 7.1 |
| V257_K258 insPAP     | 0.10 ± 0.02 | 100.0           | 0.0  | 0.33 ± 0.02  | 100.0           | 0.0 | 0.0 | 0.08 ± 0.05 | 97.0            | 3.0 |
| V257_K258 insPAPA    | 0 ± 0       | 0.0             | 0.0  | 0.88 ± 0.07  | 100.0           | 0.0 | 0.0 | 0.27 ± 0.02 | 93.7            | 6.3 |
| V257_K258 insPAPAP   | 0 ± 0       | 0.0             | 0.0  | 0.73 ± 0.01  | 100.0           | 0.0 | 0.0 | 0.31 ± 0.04 | 94.9            | 5.1 |
| V257_K258 insPAPAPA  | 0.01 ± 0.02 | 100.0           | 0.0  | 0.55 ± 0.06  | 100.0           | 0.0 | 0.0 | 0.22 ± 0.02 | 93.5            | 6.5 |
| V257_K258 insGP      | 0 ± 0       | 0.0             | 0.0  | 0.58 ± 0.04  | 100.0           | 0.0 | 0.0 | 0.25 ± 0.05 | 93.2            | 6.8 |
| V257_K258 insGPG     | 0.10 ± 0.04 | 100.0           | 0.0  | 0.84 ± 0.18  | 100.0           | 0.0 | 0.0 | 0.24 ± 0.01 | 92.5            | 7.5 |
| V257_K258 insGPGP    | 0 ± 0       | 0.0             | 0.0  | 0.58 ± 0.04  | 100.0           | 0.0 | 0.0 | 0 ± 0       | 0.0             | 0.0 |
| V257_K258 insGPGPG   | 0.07 ± 0.02 | 100.0           | 0.0  | 0.67 ± 0.07  | 100.0           | 0.0 | 0.0 | 0.27 ± 0.01 | 93.1            | 6.9 |
| V257_K258 insGPGPGP  | 0.09 ± 0.02 | 100.0           | 0.0  | 1.15 ± 0.20  | 100.0           | 0.0 | 0.0 | 0.17 ± 0.02 | 94.4            | 5.6 |

**Supplementary Table 7: Conversions of styrene 1, (*R*)-limonene 2 and 2-phenylpyridine 3 with the wild-type and insertion variants after F278 based on LILI. Biotransformations were performed in technical triplicates and standard deviations (calculated using Excel version 2016) are indicated. Pf: combined product formation in mM. Regioselectivity in %. Source data are provided as a Source Data file.**

|                      | Pf (mM)      | Selectivity (%) |       | Pf (mM)     | Selectivity (%) |     |     | Pf (mM)     | Selectivity (%) |     |
|----------------------|--------------|-----------------|-------|-------------|-----------------|-----|-----|-------------|-----------------|-----|
|                      |              | 1a              | 1b    |             | 2a              | 2b  | 2c  |             | 3a              | 3b  |
| Wild-type            | 6.68 ± 0.77  | 86.4            | 13.6  | 3.58 ± 0.44 | 98.8            | 0.7 | 0.5 | 0.64 ± 0.03 | 93.0            | 7.0 |
| F278_N279 insGG      | 15.74 ± 1.85 | 50.2            | 49.8  | 3.73 ± 0.54 | 92.7            | 4.9 | 2.4 | 3.49 ± 0.16 | 94.1            | 5.9 |
| F278_N279 insGGG     | 13.44 ± 1.33 | 55.0            | 45.0  | 4.18 ± 0.37 | 93.3            | 2.7 | 4.0 | 2.48 ± 0.11 | 93.5            | 6.5 |
| F278_N279 insGGGG    | 7.07 ± 1.56  | 40.4            | 59.6  | 3.87 ± 0.30 | 95.2            | 1.3 | 3.5 | 0.45 ± 0.08 | 92.3            | 7.7 |
| F278_N279 insGGGGG   | 4.59 ± 0.46  | 55.4            | 44.6  | 1.58 ± 0.06 | 95.5            | 3.1 | 1.4 | 1.37 ± 0.06 | 92.5            | 7.5 |
| F278_N279 insGGGGG G | 20.69 ± 0.03 | 49.0            | 51.0  | 3.05 ± 0.05 | 95.7            | 2.4 | 2.0 | 2.31 ± 0.00 | 92.4            | 7.6 |
| F278_N279 insGS      | 14.23 ± 0.67 | 42.5            | 57.5  | 3.45 ± 0.38 | 94.0            | 6.0 | 0.0 | 0.57 ± 0.04 | 93.0            | 7.0 |
| F278_N279 insGSG     | 13.97 ± 0.33 | 33.2            | 66.8  | 1.60 ± 0.05 | 91.9            | 3.2 | 4.9 | 0.64 ± 0.04 | 93.3            | 6.7 |
| F278_N279 insGSGS    | 15.41 ± 0.18 | 34.1            | 65.9  | 1.30 ± 0.16 | 92.5            | 4.0 | 3.5 | 0.39 ± 0.05 | 91.8            | 8.2 |
| F278_N279 insGSGSG   | 20.31 ± 2.89 | 33.5            | 66.5  | 0.82 ± 0.17 | 94.1            | 4.4 | 1.5 | 0.39 ± 0.08 | 91.0            | 9.0 |
| F278_N279 insGSGSGS  | 15.09 ± 2.03 | 36.4            | 63.6  | 0.90 ± 0.08 | 95.6            | 4.4 | 0.0 | 0.32 ± 0.04 | 91.0            | 9.0 |
| F278_N279 insPA      | 9.04 ± 1.31  | 27.8            | 72.2  | 0.97 ± 0.04 | 90.2            | 6.3 | 3.6 | 1.60 ± 0.32 | 92.8            | 7.2 |
| F278_N279 insPAP     | 11.29 ± 0.61 | 49.4            | 50.6  | 2.21 ± 0.03 | 92.1            | 4.6 | 3.3 | 2.86 ± 0.16 | 95.5            | 4.5 |
| F278_N279 insPAPA    | 14.23 ± 0.54 | 52.9            | 47.1  | 3.66 ± 0.11 | 92.7            | 3.7 | 3.7 | 6.16 ± 0.14 | 96.0            | 4.0 |
| F278_N279 insPAPAP   | 14.11 ± 1.25 | 15.8            | 84.2  | 6.03 ± 0.22 | 92.2            | 3.4 | 4.4 | 1.76 ± 0.01 | 94.0            | 6.0 |
| F278_N279 insPAPAPA  | 9.82 ± 3.56  | 0.0             | 100.0 | 2.29 ± 0.19 | 92.5            | 3.5 | 4.0 | 0.73 ± 0.00 | 93.9            | 6.1 |
| F278_N279 insGP      | 11.55 ± 0.73 | 58.2            | 41.8  | 1.21 ± 0.03 | 92.3            | 4.1 | 3.7 | 7.42 ± 0.00 | 95.6            | 4.4 |
| F278_N279 insGPG     | 11.76 ± 1.59 | 29.4            | 70.6  | 6.92 ± 0.68 | 89.0            | 5.2 | 5.7 | 1.72 ± 0.06 | 93.5            | 6.5 |
| F278_N279 insGPGP    | 13.71 ± 0.08 | 17.3            | 82.7  | 4.44 ± 0.12 | 87.6            | 6.8 | 5.6 | 1.31 ± 0.04 | 92.2            | 7.8 |
| F278_N279 insGPGPG   | 13.31 ± 0.53 | 15.4            | 84.6  | 3.28 ± 0.19 | 87.6            | 3.6 | 8.8 | 1.02 ± 0.06 | 92.5            | 7.5 |
| F278_N279 insGPGPGP  | 17.94 ± 1.41 | 11.6            | 88.4  | 2.37 ± 0.23 | 89.4            | 3.5 | 7.1 | 1.68 ± 0.05 | 92.2            | 7.8 |

**Supplementary Table 8: Conversions of styrene 1, (*R*)-limonene 2 and 2-phenylpyridine 3 with the wild-type and insertion variants after Q286 based on LILI.** Biotransformations were performed in technical triplicates and standard deviations (calculated using Excel version 2016) are indicated. Pf: combined product formation in mM. Regioselectivity in %. Source data are provided as a Source Data file.

|                      | Pf (mM)      | Selectivity (%) |       | Pf (mM)      | Selectivity (%) |     |     | Pf (mM)     | Selectivity (%) |      |
|----------------------|--------------|-----------------|-------|--------------|-----------------|-----|-----|-------------|-----------------|------|
|                      |              | 1a              | 1b    |              | 2a              | 2b  | 2c  |             | 3a              | 3b   |
| Wild-type            | 6.68 ± 0.77  | 86.4            | 13.6  | 3.58 ± 0.44  | 98.8            | 0.7 | 0.5 | 0.64 ± 0.03 | 93.0            | 7.0  |
| Q286_A287 insGG      | 6.61 ± 0.70  | 11.2            | 88.8  | 0.45 ± 0.04  | 93.5            | 1.9 | 4.6 | 0.89 ± 0.02 | 83.6            | 16.4 |
| Q286_A287 insGGG     | 8.74 ± 0.97  | 9.1             | 90.9  | 0.57 ± 0.05  | 91.2            | 3.6 | 5.2 | 1.38 ± 0.10 | 83.9            | 16.1 |
| Q286_A287 insGGGG    | 0 ± 0        | 0.0             | 0.0   | 0 ± 0        | 0.0             | 0.0 | 0.0 | 0 ± 0       | 0.0             | 0.0  |
| Q286_A287 insGGGGG   | 6.84 ± 1.08  | 6.2             | 93.8  | 0.23 ± 0.01  | 100.0           | 0.0 | 0.0 | 0.99 ± 0.03 | 85.4            | 14.6 |
| Q286_A287 insGGGGG G | 6.75 ± 0.26  | 7.1             | 92.9  | 0.19 ± 0.01  | 100.0           | 0.0 | 0.0 | 0.67 ± 0.04 | 86.1            | 13.9 |
| Q286_A287 insGS      | 6.65 ± 2.69  | 0.0             | 100.0 | 0.48 ± 0.01  | 96.8            | 3.2 | 0.0 | 0.30 ± 0.01 | 84.9            | 15.1 |
| Q286_A287 insGSG     | 15.00 ± 0.38 | 0.0             | 100.0 | 0.56 ± 0.05  | 100.0           | 0.0 | 0.0 | 0.36 ± 0.01 | 80.9            | 19.1 |
| Q286_A287 insGSGS    | 0 ± 0        | 0.0             | 0.0   | 0 ± 0        | 0.0             | 0.0 | 0.0 | 0 ± 0       | 0.0             | 0.0  |
| Q286_A287 insGSGSG   | 17.07 ± 1.03 | 0.0             | 100.0 | 0.25 ± 0.02  | 100.0           | 0.0 | 0.0 | 0.34 ± 0.01 | 83.4            | 16.6 |
| Q286_A287 insGSGSGS  | 0 ± 0        | 0.0             | 0.0   | 0 ± 0        | 0.0             | 0.0 | 0.0 | 0 ± 0       | 0.0             | 0.0  |
| Q286_A287 insPA      | 16.32 ± 1.13 | 30.2            | 69.8  | 1.87 ± 0.22  | 89.0            | 5.5 | 5.5 | 1.26 ± 0.08 | 86.4            | 13.6 |
| Q286_A287 insPAP     | 19.14 ± 1.6  | 15.6            | 84.4  | 1.35 ± 0.08  | 89.1            | 5.4 | 5.5 | 1.34 ± 0.07 | 87.8            | 12.2 |
| Q286_A287 insPAPA    | 15.10 ± 0.94 | 7.5             | 92.5  | 0.96 ± 0.04  | 89.5            | 4.2 | 6.3 | 1.01 ± 0.01 | 85.8            | 14.2 |
| Q286_A287 insPAPAP   | 2.39 ± 0.50  | 12.2            | 87.8  | 0.88 ± 0.05  | 92.4            | 5.1 | 2.5 | 0.78 ± 0.03 | 91.2            | 8.8  |
| Q286_A287 insPAPAPA  | 18.93 ± 1.19 | 7.1             | 92.9  | 0.73 ± 0.078 | 93.2            | 4.9 | 1.9 | 0.96 ± 0.02 | 89.6            | 10.4 |
| Q286_A287 insGP      | 11.52 ± 0.79 | 11.8            | 88.2  | 0.66 ± 0.05  | 92.4            | 3.4 | 4.2 | 1.37 ± 0.07 | 86.0            | 14.0 |
| Q286_A287 insGPG     | 13.35 ± 1.26 | 7.5             | 92.5  | 1.23 ± 0.08  | 95.6            | 2.4 | 2.0 | 1.86 ± 0.03 | 79.8            | 20.2 |
| Q286_A287 insGPGP    | 13.94 ± 0.61 | 7.9             | 92.1  | 0.59 ± 0.05  | 91.1            | 3.7 | 5.1 | 1.23 ± 0.05 | 88.5            | 11.5 |
| Q286_A287 insGPGPG   | 14.52 ± 0.61 | 5.8             | 94.2  | 0.86 ± 0.04  | 92.7            | 3.8 | 3.4 | 1.92 ± 0.08 | 81.4            | 18.6 |
| Q286_A287 insGPGPGP  | 15.67 ± 0.24 | 6.5             | 93.5  | 0.42 ± 0.03  | 88.1            | 7.0 | 4.8 | 1.04 ± 0.01 | 89.5            | 10.5 |

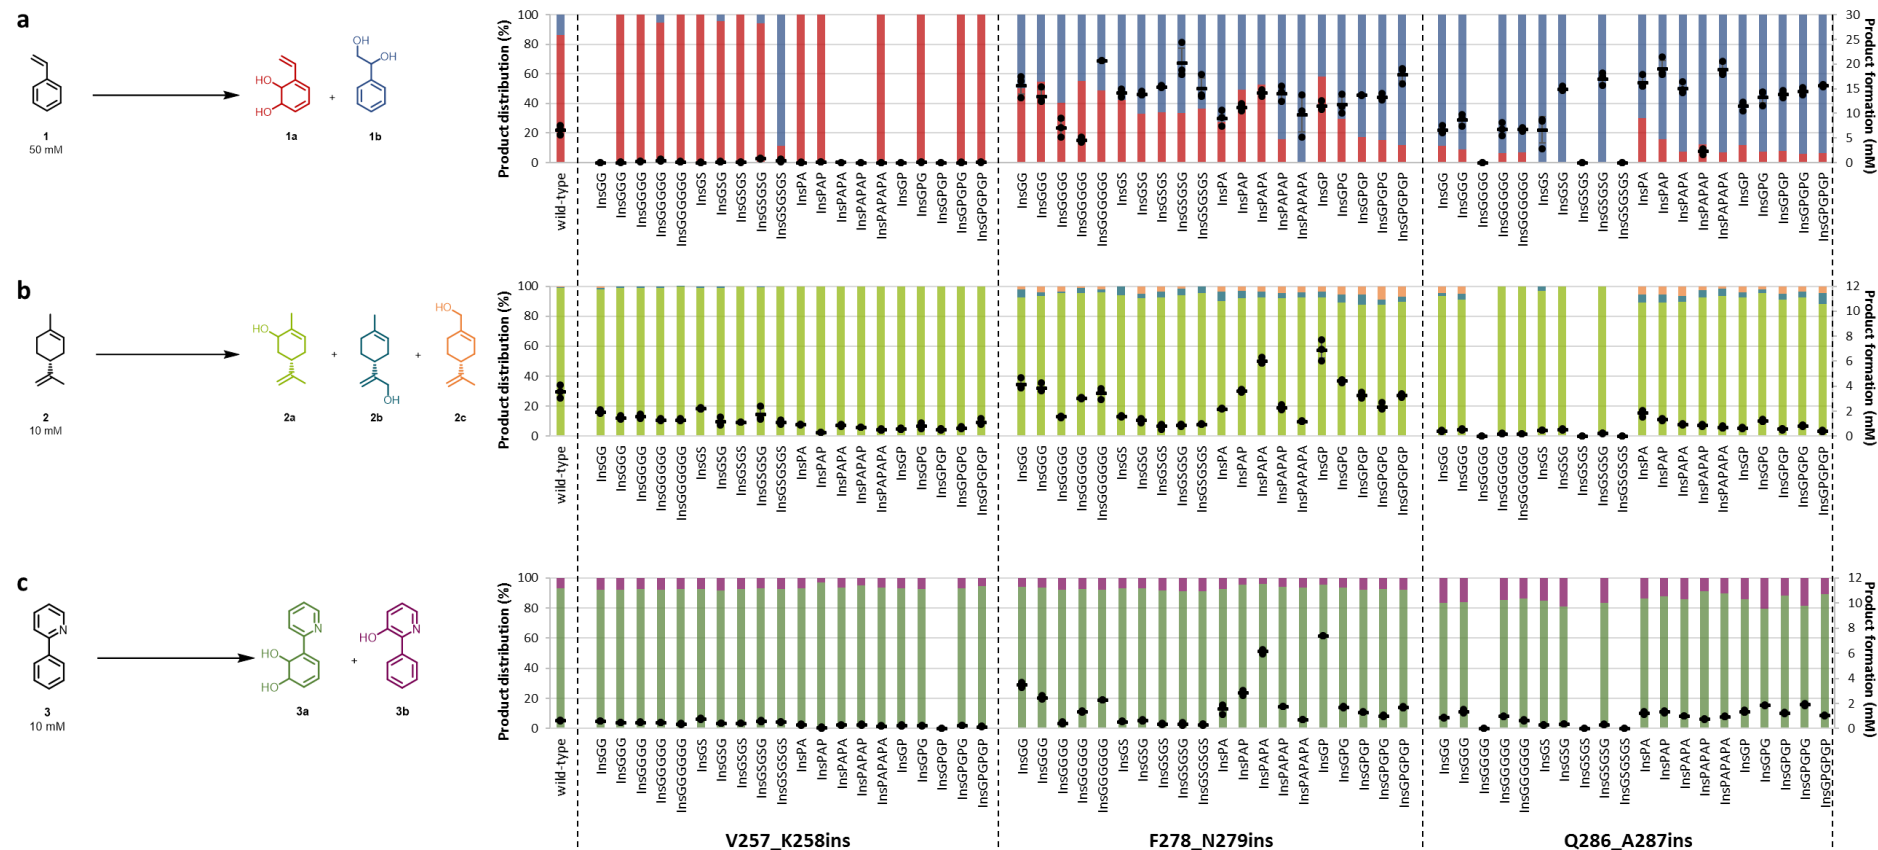

**Supplementary Fig. 11: Biotransformation results with variants derived from the LILI approach. a**, Product formation and distribution of the products **1a** (red, bottom bars) and **1b** (blue, top bars) obtained during the biotransformation of **1** with the wild-type and variants of the LILI library. **b**, Product formation and distribution of the products **2a** (green, bottom bars), **2b** (blue, middle bars) and **2c** (orange, top bars) obtained during the biotransformation of **2** with the wild-type and variants of the LILI library. **c**, Product formation and distribution of the products **3a** (green, bottom bars) and **3b** (purple, top bars) obtained during the biotransformation of **3** with the wild-type and variants of the LILI library. The reaction conditions as mentioned in Fig. 2 were applied, the substrate concentrations are indicated in the reaction equation. The reactions were performed in technical triplicates (black dots) with average values (horizontal bar) and standard deviations (calculated using Excel version 2016) indicated. Error bars may be covered by markers. Source data are provided as a Source Data file.

**Supplementary Table 9: Different wild-types and active-site variants known from literature compared to selected loop variants from this study.** t.w.: this work. n.d.: not determined. Source data are provided as a Source Data file.

|             |                | Product formation (%)                                   | Selectivity (%)                                         |                                  |                                  | Annotation                                                 | Source                                                      |                                             |   |
|-------------|----------------|---------------------------------------------------------|---------------------------------------------------------|----------------------------------|----------------------------------|------------------------------------------------------------|-------------------------------------------------------------|---------------------------------------------|---|
|             |                |                                                         | 1a                                                      | 1b                               |                                  |                                                            |                                                             |                                             |   |
| Styrene 1   | CDO wild-type  | 13.4 ± 1.55                                             | 86.4                                                    | 13.6<br>(ee 18.4 ± 1.1 R-1b)     |                                  | 50 mM substrate<br>0.1 g <sub>cww</sub> /ml <i>E. coli</i> | t.w.                                                        |                                             |   |
|             | Literature     | CDO wild-type<br>( <i>Pseudomonas fluorescens</i> IP01) | 71 ± 6                                                  | 99.7                             | 0.3<br>(ee 43 ± 3 R-1b)          |                                                            | 10 mM substrate,<br>0.2 g <sub>cww</sub> /ml <i>E. coli</i> | 1                                           |   |
|             |                | NDO wild-type<br>( <i>Pseudomonas</i> sp. NCIB 9816-4)  | 74 ± 3                                                  | 0                                | >99<br>(ee 78 ± 1 R-1b)          |                                                            | 10 mM substrate,<br>0.2 g <sub>cww</sub> /ml <i>E. coli</i> | 2                                           |   |
|             |                | TDO wild-type<br>( <i>Pseudomonas. putida</i> F1)       | 9                                                       | 85                               | 15<br>(ee >99 R-1b)              |                                                            | 10 mM substrate                                             | 3                                           |   |
|             | Active-site    | CDO_M232A                                               | 97 ± 10                                                 | 8                                | 92<br>(ee 95 ± 1 R-1b)           |                                                            | 10 mM substrate,<br>0.2 g <sub>cww</sub> /ml <i>E. coli</i> | 1                                           |   |
|             |                | NDO_H295A                                               | 92 ± 2                                                  | <1                               | >99<br>(ee 79 ± 1 R-1b)          |                                                            | 10 mM substrate,<br>0.2 g <sub>cww</sub> /ml <i>E. coli</i> | 2                                           |   |
|             |                | TDO_T365N                                               | 14                                                      | 24                               | 76<br>(ee >99 R-1b)              |                                                            | 10 mM substrate,                                            | 3                                           |   |
|             | Loop           | CDO_N279_D280insE                                       | 47.4 ± 3.2                                              | 67.5                             | 32.5<br>(ee 11.4 ± 5.8 R-1b)     |                                                            | 50 mM substrate<br>0.1 g <sub>cww</sub> /ml <i>E. coli</i>  | t.w.                                        |   |
|             |                | CDO_F282A                                               | 24.6 ± 5.7                                              | 95.0                             | 5.0<br>(ee 72.7 ± 0.6 R-1b)      |                                                            | 50 mM substrate<br>0.1 g <sub>cww</sub> /ml <i>E. coli</i>  | t.w.                                        |   |
|             |                | CDO_Q286_A287insGSGSG                                   | 34.1 ± 2.1                                              | <1                               | >99<br>(ee 6.4 ± 0.2 R-1b)       |                                                            | 50 mM substrate<br>0.1 g <sub>cww</sub> /ml <i>E. coli</i>  | t.w.                                        |   |
|             |                | CDO_F282_L284del                                        | 39.9 ± 4.0                                              | 6.3                              | 93.7<br>(ee 1.4 ± 0.6 R-1b)      |                                                            | 50 mM substrate<br>0.1 g <sub>cww</sub> /ml <i>E. coli</i>  | t.w.                                        |   |
|             |                |                                                         |                                                         | 2a                               | 2b                               | 2c                                                         |                                                             |                                             |   |
|             | (R)-Limonene 2 | CDO wild-type                                           | 35.8 ± 4.4                                              | 98.8<br>(ee 99.6 ± 0.1 1R,5S-2a) | 0.7                              | 0.5                                                        | 0.1 g <sub>cww</sub> /ml <i>E. coli</i>                     | t.w.                                        |   |
|             |                | Literature                                              | CDO wild-type<br>( <i>Pseudomonas fluorescens</i> IP01) | 46 ± 10                          | > 95<br>(ee > 98 ± 0.1 1R,5S-2a) | <5                                                         | 0                                                           | 0.2 g <sub>cww</sub> /ml <i>E. coli</i>     | 1 |
|             |                |                                                         | CDO wild-type<br>( <i>Pseudomonas putida</i> S1)        | 40                               | >95<br>(ee >98 1R,5S-2a)         | 0                                                          | 0                                                           | OD <sub>600</sub> = 3.0<br>6.2 mM substrate | 4 |
|             |                |                                                         | NDO wild-type<br>( <i>Pseudomonas</i> sp. NCIB 9816-4)  | n.d.                             | 92                               | 8                                                          | 0                                                           | 0.2 g <sub>cww</sub> /ml <i>E. coli</i>     | 2 |
| Active-site |                | CDO_M232A                                               | >99                                                     | 95<br>(ee > 98 1R,5S-2a)         | 5                                | 0                                                          | 0.2 g <sub>cww</sub> /ml <i>E. coli</i>                     | 1                                           |   |
|             |                | NDO_H295A_V260A                                         | 213% of wild-type                                       | 93<br>(ee 62 1R,5S-2a)           | 7                                | 0                                                          | 0.2 g <sub>cww</sub> /ml <i>E. coli</i>                     | 2                                           |   |
| Loop        |                | CDO_A283del                                             | 89.2 ± 8.0                                              | 98.2<br>(ee 62 1R,5S-2a)         | 0.8                              | 1.0                                                        | 0.1 g <sub>cww</sub> /ml <i>E. coli</i>                     | t.w.                                        |   |
|             |                | CDO_L284G                                               | 20.8 ± 1.9                                              | 30.8<br>(ee >99 1R,5S-2a)        | 19.4                             | 49.7                                                       | 0.1 g <sub>cww</sub> /ml <i>E. coli</i>                     | t.w.                                        |   |
|             |                | CDO_M289A                                               | 19.4 ± 0.9                                              | 54.1<br>(ee >99 1R,5S-2a)        | 6.2                              | 39.8                                                       | 0.1 g <sub>cww</sub> /ml <i>E. coli</i>                     | t.w.                                        |   |

|                    |               |                                                          | 3a                                                      | 3b                                                      |      |                                                                                                |      |
|--------------------|---------------|----------------------------------------------------------|---------------------------------------------------------|---------------------------------------------------------|------|------------------------------------------------------------------------------------------------|------|
| 2-Phenylpyridine 3 | CDO wild-type | 6.4 ± 0.3                                                | 93.0<br>( <i>ee</i> >99<br>1 <i>S</i> , 2 <i>R</i> -3a) | 7.0                                                     |      | t.w.                                                                                           |      |
|                    | Literature    | TDO wild-type<br>( <i>Pseudomonas putida</i> UV4)        | 1% yield                                                | 100<br>( <i>ee</i> >98<br>1 <i>S</i> , 2 <i>R</i> -3a)  |      |                                                                                                | 5    |
|                    |               | NDO wild-type<br>( <i>Pseudomonas</i> sp. NCIB 9816-4)   | 25% yield                                               | ≥95                                                     |      | ≤5% <i>cis</i> -3,4-<br>dihydrodiol ( <i>ee</i><br>>98 1 <i>S</i> , 2 <i>R</i> ) was<br>formed | 5    |
|                    |               | BPDO wild-type ( <i>Sphingomonas yanoikuyae</i> (B8/36)) | 59% yield                                               | ≥95                                                     |      |                                                                                                | 5    |
|                    | Loop          | CDO_A283del                                              | >99                                                     | 98.7<br>( <i>ee</i> >99<br>1 <i>S</i> , 2 <i>R</i> -3a) | 1.3  |                                                                                                | t.w. |
|                    |               | CDO_F282A                                                | 99.9 ± 4.0                                              | 98.6<br>( <i>ee</i> >99<br>1 <i>S</i> , 2 <i>R</i> -3a) | 1.4  |                                                                                                | t.w. |
|                    |               | CDO_Q286_A287insGPG                                      | 18.6 ± 0.3                                              | 79.8<br>( <i>ee</i> >99<br>1 <i>S</i> , 2 <i>R</i> -3a) | 20.2 |                                                                                                | t.w. |

**Supplementary Table 10: Enantiomeric excesses of the biotransformations of styrene 1, (*R*)-limonene 2 and 2-phenylpyridine 3 with the selected variants from Supplementary Table S19, and saturation and deletion variants.** Biotransformations were performed in technical triplicates and standard deviations (calculated using Excel version 2016) are indicated. Enantiomeric excess in %. n.d.: not determined. -: not detected. Source data are provided as a Source Data file.

| Variant       | Product (%)                  |                                           |                                                      |
|---------------|------------------------------|-------------------------------------------|------------------------------------------------------|
|               | Phenylethan-1,2-diol         | Carveol                                   | 1,2-Dihydroxy-3-(2'-pyridyl)-<br>cyclohexa-3,5-diene |
|               | 1b                           | 2a                                        | 3a                                                   |
| Wild-type     | 18.43 ± 1.08 ( <i>R</i> )-1b | 99.73 ± 0.13 (1 <i>R</i> ,5 <i>S</i> )-2a | >99 % (+)-(1 <i>S</i> ,2 <i>R</i> )-3a               |
| F282A         | 72.72 ± 0.63 ( <i>R</i> )-1b | n.d.                                      | >99 % (+)-(1 <i>S</i> ,2 <i>R</i> )-3a               |
| M289A         | n.d.                         | 99.97 ± 0.05 (1 <i>R</i> ,5 <i>S</i> )-2a | >99 % (+)-(1 <i>S</i> ,2 <i>R</i> )-3a               |
| N279_D280insE | 11.42 ± 5.84 ( <i>R</i> )-1b | n.d.                                      | >99 % (+)-(1 <i>S</i> ,2 <i>R</i> )-3a               |
| A283del       | 42.00 ± 0.59 ( <i>R</i> )-1b | >99.9 (1 <i>R</i> ,5 <i>S</i> )-2a        | >99 % (+)-(1 <i>S</i> ,2 <i>R</i> )-3a               |
| F282_L284del  | 1.49 ± 0.15 ( <i>R</i> )-1b  | 93.30 ± 0.72 (1 <i>R</i> ,5 <i>S</i> )-2a | >99 % (+)-(1 <i>S</i> ,2 <i>R</i> )-3a               |
| F278V         | 41.32 ± 6.64 ( <i>R</i> )-1b | 99.99 ± 0.01 (1 <i>R</i> ,5 <i>S</i> )-2a | >99 % (+)-(1 <i>S</i> ,2 <i>R</i> )-3a               |
| F282V         | 69.83 ± 3.61 ( <i>R</i> )-1b | >99.9 (1 <i>R</i> ,5 <i>S</i> )-2a        | >99 % (+)-(1 <i>S</i> ,2 <i>R</i> )-3a               |
| F282T         | -                            | >99.9 (1 <i>R</i> ,5 <i>S</i> )-2a        | >99 % (+)-(1 <i>S</i> ,2 <i>R</i> )-3a               |
| L284G         | 26.03 ± 1.08 ( <i>R</i> )-1b | >99.9 (1 <i>R</i> ,5 <i>S</i> )-2a        | >99 % (+)-(1 <i>S</i> ,2 <i>R</i> )-3a               |
| Q286F         | 15.83 ± 0.23 ( <i>R</i> )-1b | >99.9 (1 <i>R</i> ,5 <i>S</i> )-2a        | >99 % (+)-(1 <i>S</i> ,2 <i>R</i> )-3a               |
| I288S         | 15.56 ± 0.70 ( <i>S</i> )-1b | 99.76 ± 0.02 (1 <i>R</i> ,5 <i>S</i> )-2a | >99 % (+)-(1 <i>S</i> ,2 <i>R</i> )-3a               |
| I288T         | 1.17 ± 0.83 ( <i>S</i> )-1b  | >99.9 (1 <i>R</i> ,5 <i>S</i> )-2a        | >99 % (+)-(1 <i>S</i> ,2 <i>R</i> )-3a               |
| M289K         | 23.97 ± 0.44 ( <i>R</i> )-1b | >99.9 (1 <i>R</i> ,5 <i>S</i> )-2a        | >99 % (+)-(1 <i>S</i> ,2 <i>R</i> )-3a               |

The enantiomeric excess of 3a was determined by comparison to two in-house standards of (+)-(1*S*,2*R*)-3a. The configuration was determined by optical rotation.<sup>5</sup> Multiple columns and methods were applied, which all reveal only one enantiomer.

**Supplementary Table 11: Diastereomeric excesses of the biotransformations (*R*)-limonene 2 with the selected variants from Supplementary Table 10, saturation and deletion variants.** Biotransformations were performed in technical triplicates and standard deviations (calculated using Excel version 2016) are indicated. Diastereomeric excess in %. Source data are provided as a Source Data file.

| Variant      | Carveol<br>2a                             |
|--------------|-------------------------------------------|
| Wild-type    | 94.70 ± 0.37 (1 <i>R</i> ,5 <i>S</i> )-2a |
| M289A        | 97.05 ± 0.26 (1 <i>R</i> ,5 <i>S</i> )-2a |
| A283del      | 87.27 ± 1.14 (1 <i>R</i> ,5 <i>S</i> )-2a |
| F282_L284del | 98.41 ± 0.02 (1 <i>R</i> ,5 <i>S</i> )-2a |
| F278V        | 55.10 ± 2.53 (1 <i>R</i> ,5 <i>S</i> )-2a |
| F282V        | 99.14 ± 0.01 (1 <i>R</i> ,5 <i>S</i> )-2a |
| F282T        | 99.41 ± 0.20 (1 <i>R</i> ,5 <i>S</i> )-2a |
| L284G        | 38.14 ± 1.81 (1 <i>R</i> ,5 <i>S</i> )-2a |
| Q286F        | 98.11 ± 0.08 (1 <i>R</i> ,5 <i>S</i> )-2a |
| I288S        | 90.23 ± 1.53 (1 <i>R</i> ,5 <i>S</i> )-2a |
| I288T        | 99.12 ± 0.06 (1 <i>R</i> ,5 <i>S</i> )-2a |
| M289K        | 88.02 ± 0.82 (1 <i>R</i> ,5 <i>S</i> )-2a |

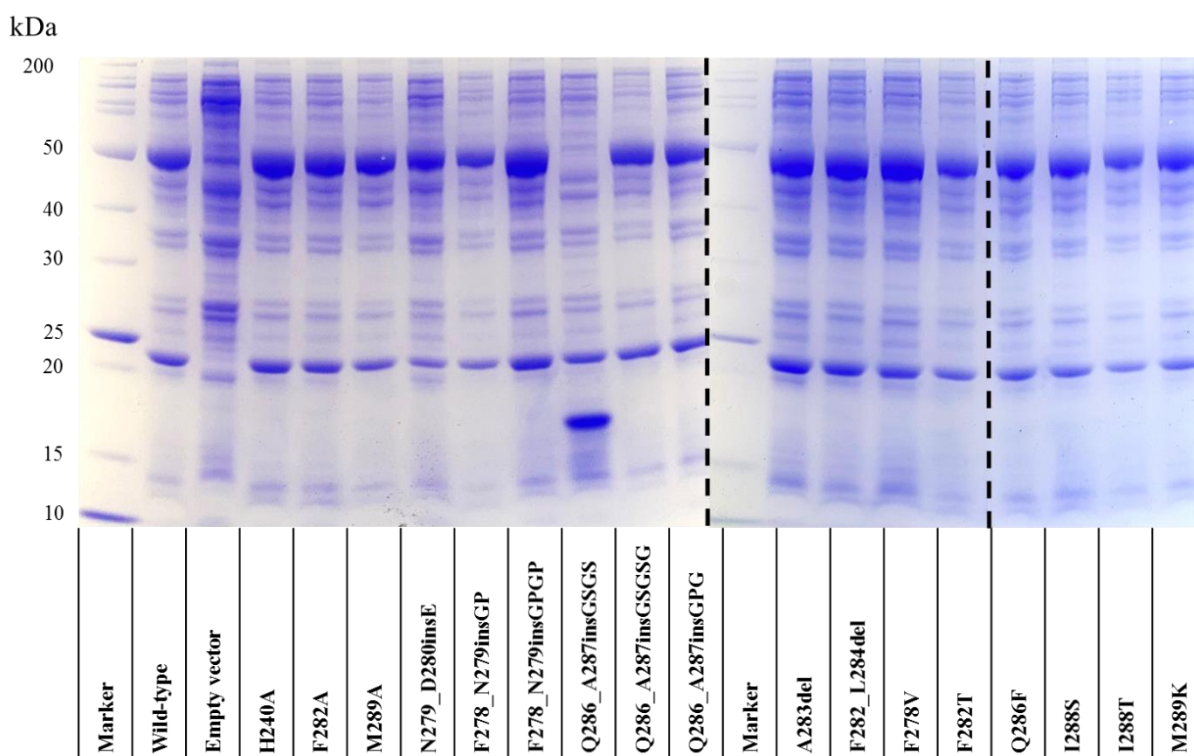

**Supplementary Fig. 12: SDS-PAGE analysis of the empty vector, expressed wild-type and selected variants of the CDO.** The analysis of the expression levels was performed in a RunBlue 12% Bis-Tris Gel from Expedeon (Abcam, Berlin, Germany) with PageRuler™ Unstained Protein Ladder (Thermo Scientific, Waltham, USA) as marker. Whole cell samples were standardized to  $OD_{600} = 4$ . The bands of the  $\alpha$ -subunit (52 kDa) and  $\beta$ -subunit (23 kDa) are clearly visible, except for the  $\alpha$ -subunit of Q286\_A287insGSGS. The bands of the reductase (44 kDa) and ferredoxin (12 kDa) were not observed. Source data are provided as a Source Data file. Dashed lines represent different gels and vertically sliced image. SDS-PAGE analysis was performed independently 15 times for the wildtype with comparable results. Other variants were analyzed *via* SDS-PAGE with the wildtype as positive control at least once and repeated when preparation errors occurred.

All obtained variants were analyzed *via* non-native SDS-PAGE of the whole cells as shown in Supplementary Fig. S12. All variants, also these which showed no activity for any of the tested variants, were expressed. No native SDS-PAGE was observed, so no conclusions about the solubility or correct folding could be drawn.



## Supplementary Note 1: Synthesis of (+)-mentha-1.8-dien-10-ol (2b)

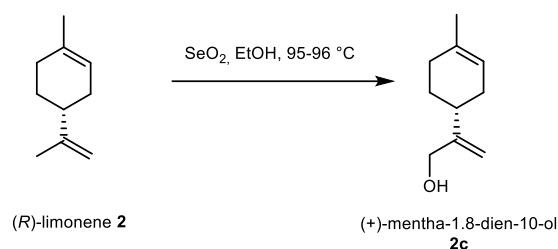

The synthesis of (+)-mentha-1.8-dien-10-ol **2b** was performed according to Thomas and Bucher.<sup>6</sup>

Yellow oil; <sup>1</sup>H NMR (500 MHz, CDCl<sub>3</sub>): δ 1.43-1.56 (2 H, m), 1.66 (3 H, s), 1.78-2.23 (6 H, m), 4.18 (2 H, d, *J* 5.7), 4.91 (1 H, s), 5.04-5.07 (1 H, m), 5.40 (1 H, br s); <sup>13</sup>C NMR (500 MHz CDCl<sub>3</sub>): δ 23.48, 28.18, 30.53, 31.36, 36.91, 65.19, 107.83, 120.45, 133.85, 153.67. MS (GC, ED): *m/z* (%) = 153 (1, M<sup>+</sup>), 152 (11.8, M), 134 (47), 121 (17), 119 (91), 107 (14), 106 (100), 105 (39), 94 (34), 93 (61), 92 (46), 91 (82), 84 (25), 83 (16), 79 (80), 77 (42), 68 (60), 67 (72), 65 (16)

GC-MS and NMR analysis revealed contaminations with formed perillyl alcohol.

## Supplementary Note 2: Determination of product formation, distribution, enantiomeric excess and diastereomeric excess

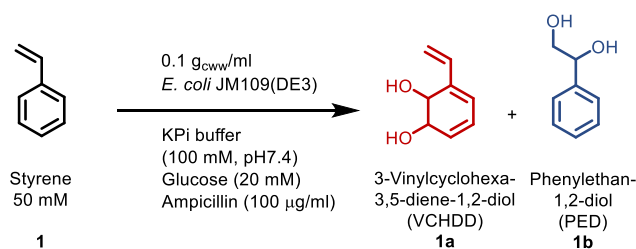

Supplementary Fig. 13: Conversion of styrene to 3-vinylcyclohexa-3,5-diene-1,2-diol **1a** and 1-phenylethan-1,2-diol **1b**

### 3-vinylcyclohexa-3,5-diene-1,2-diol (1a)

MS (GC, EI) m/z (%) = 139 (1.7, M<sup>+</sup>), 138 (19, M), 120 (94), 109 (21), 92 (39), 91 (100), 81 (19), 79 (23), 77 (24), 65 (17)

### 1-phenyl-1,2-ethanediol (1b)

Rieske non-heme iron oxygenase (RO)-catalyzed biotransformations

MS (GC, EI) m/z (%) = 139 (0.8, M<sup>+</sup>), 138 (9, M), 108 (9), 107 (100), 91 (4), 79 (48), 77 (28)

Standard Sigma Aldrich

MS (GC, EI) m/z (%) = 139 (2, M<sup>+</sup>), 138 (23, M), 108 (22), 107 (100), 91 (10), 79 (100), 77 (77)

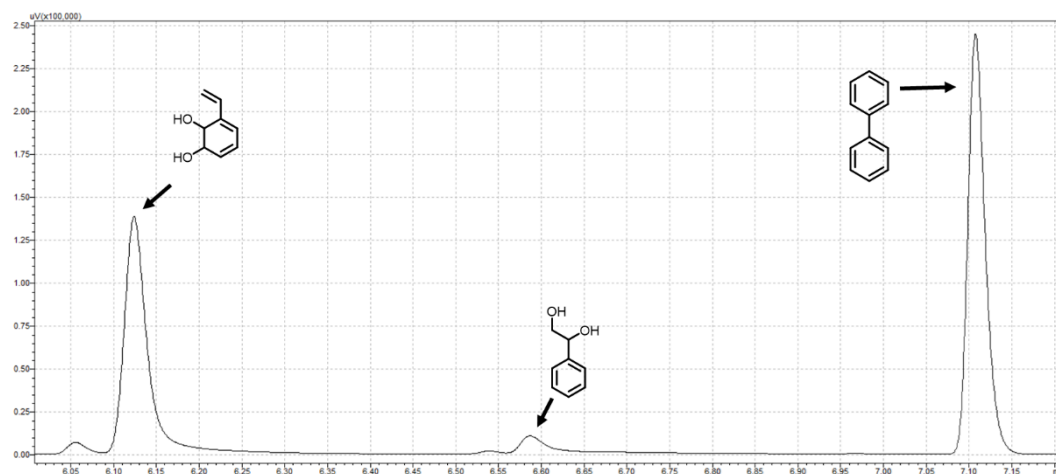

**Supplementary Fig. 14: GC-FID chromatogram of CDO wild-type catalyzed biotransformation of styrene 1.**

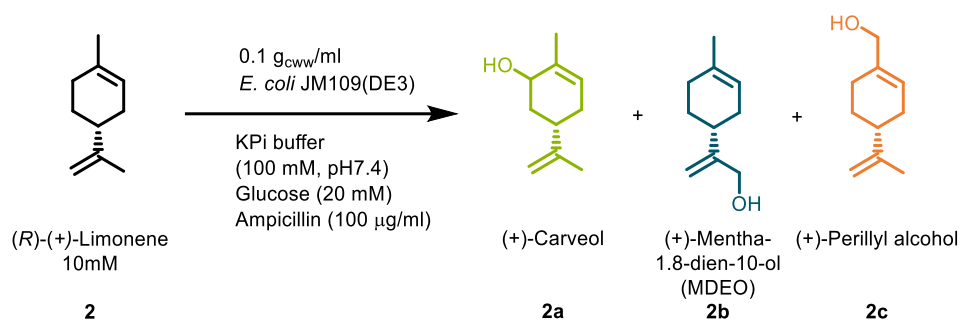

**Supplementary Fig. 15: Conversion of (R)-(+)-limonene 2 to (+)-carveol 2a, (+)-mentha-1.8-dien-10-ol 2b and (+)-perillyl alcohol 2c.**

### (+)-carveol 2a

Rieske non-heme iron oxygenase (RO)-catalyzed biotransformation

MS (GC, EI) m/z (%) = 153 (1.2, M<sup>+</sup>), 152 (11, M), 137 (11), 119 (11), 109 (100), 108 (13), 95 (13), 94 (4), 93 (11), 92 (5), 91 (15), 84 (47), 83 (25), 81 (10), 80 (8), 79 (10), 69 (17), 55 (18)

Standard Sigma-Aldrich

MS (GC, EI) m/z (%) = 153 (0.3, M<sup>+</sup>), 152 (3, M), 137 (68), 119 (34), 109 (77), 108 (12), 95 (24), 94 (25), 93 (27), 92 (17), 91 (24), 84 (100), 83 (44), 81 (25), 80 (25), 79 (24), 69 (36), 55 (31)

### (+)-mentha-1.8-dien-10-ol 2b

Rieske non-heme iron oxygenase (RO)-catalyzed biotransformation

MS (GC, EI) m/z (%) = 153 (5, M<sup>+</sup>), 152 (18, M), 134 (63), 121 (27), 119 (100), 107 (22), 106 (79), 105 (50), 95 (29), 94 (49), 93 (80), 92 (54), 91 (82), 84 (40), 79 (95), 77 (42), 68 (95), 67 (98), 55 (49)

### (+)-perillyl alcohol 2c

Rieske non-heme iron oxygenase (RO)-catalyzed biotransformation

MS (GC, EI) m/z (%) = 153 (1.6, M<sup>+</sup>), 152 (9, M), 121 (83), 119 (31), 109 (26), 108 (28), 107 (37), 106 (18), 105 (22), 95 (38), 94 (52), 93 (95), 91 (53), 81 (37), 79 (100), 77 (30), 68 (90), 67 (80), 55 (44)

Standard Sigma-Aldrich

MS (GC, EI)  $m/z$  (%) = 153 (2,  $M^+$ ), 152 (18,  $M$ ), 121 (87), 119 (48), 109 (35), 108 (33), 107 (14), 106 (28), 105 (28), 95 (18), 94 (18), 93 (90), 91 (61), 81 (29), 79 (100), 77 (32), 68 (86), 67 (77), 55 (39)

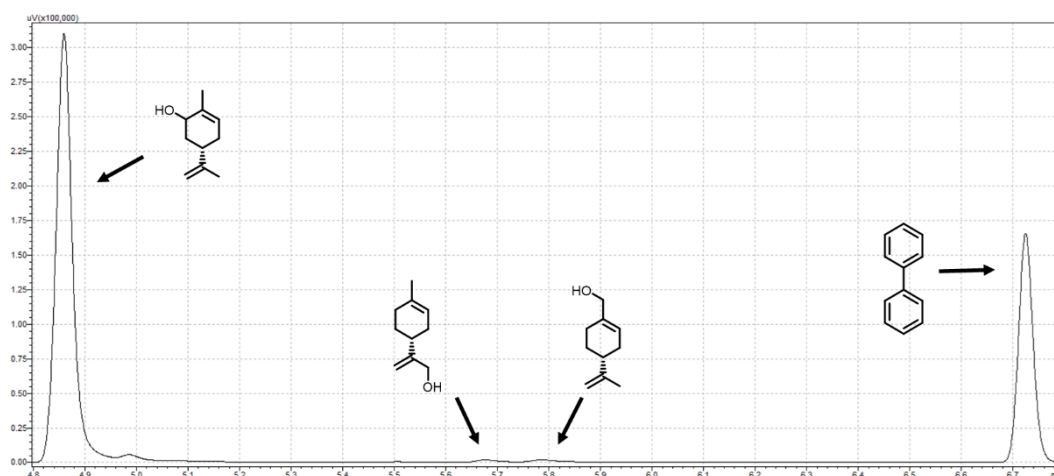

**Supplementary Fig. 16: GC-FID chromatogram of CDO wild-type catalyzed biotransformation of (*R*)-(+)-limonene 2.**

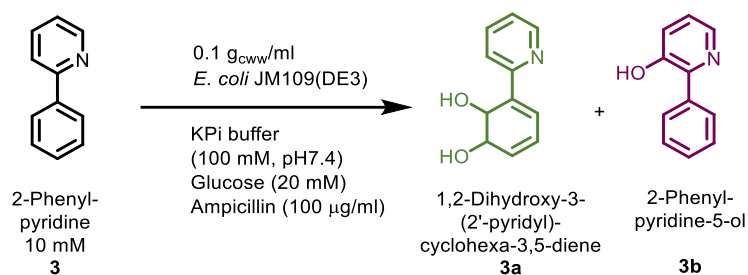

**Supplementary Fig. 17: Conversion of 2-phenylpyridine 3 to 1,2-dihydroxy-3-(2'-pyridyl)-cyclohexa-3,5-diene 3a and 2-phenylpyridine-5-ol 3b.**

### 1,2-dihydroxy-3-(2'-pyridyl)-cyclohexa-3,5-diene 3a

Rieske non-heme iron oxygenase (RO)-catalyzed biotransformations

MS (LC, ESI, positive) m/z (%) = 191 (M<sup>+</sup>, 12), 190 (100, M), 189 (58), 173 (4), 172 (35)

Standard from in-house library, derived from an upscaling of biotransformation of 2-phenylpyridine with TDO Wild-type

MS (LC, ESI, positive) m/z (%) = 191 (M<sup>+</sup>, 6), 190 (100, M), 173 (6), 172 (48)

Brown solid;  $[\alpha]_D^{+161}$  (c 1.1, MeOH); <sup>1</sup>H NMR δ (CDCl<sub>3</sub>, 500 MHz), 4.50 (1 H, m, H-1), 4.93 (1 H, d,  $J_{1,2}$  9.7, H-2), 6.18 (2 H, m, H-5, H-6), 6.65 (1 H, d,  $J_{4,5}$  5.4, H-4), 6.89 (1 H, dd,  $J_{4',3'}$  9.9,  $J_{4',5'}$  2.5, H-4'), 7.51 (1 H, d,  $J_{3',4'}$  5.4, H-3'), 7.6 (1 H, d,  $J_{5',4'}$  8, H-5'), 8.51 (1 H, d,  $J_{6',5'}$  4.6, H-6'); <sup>13</sup>C NMR δ (500 MHz, CDCl<sub>3</sub>) 67.26, 69.24, 119.98, 122.13, 123.58, 124.82, 131.44, 136.21, 136.97, 148.19, 157.33; <sup>5</sup>

### 2-phenylpyridine-5-ol 3b

Rieske non-heme iron oxygenase (RO)-catalyzed biotransformations

MS (LC, ESI, positive) m/z (%) = 173 (12, M<sup>+</sup>), 172 (100, M)

Standard Fluorochem

MS (LC, ESI, positive) m/z (%) = 173 (13, M<sup>+</sup>), 172 (100, M)

MS (GC, EI) m/z (%) = 172 (5.6, M<sup>+</sup>), 171 (52, M), 170 (100), 169 (2), 144 (1), 143 (7), 142 (7), 141 (3), 140 (2), 117 (6), 116 (9), 115 (27)

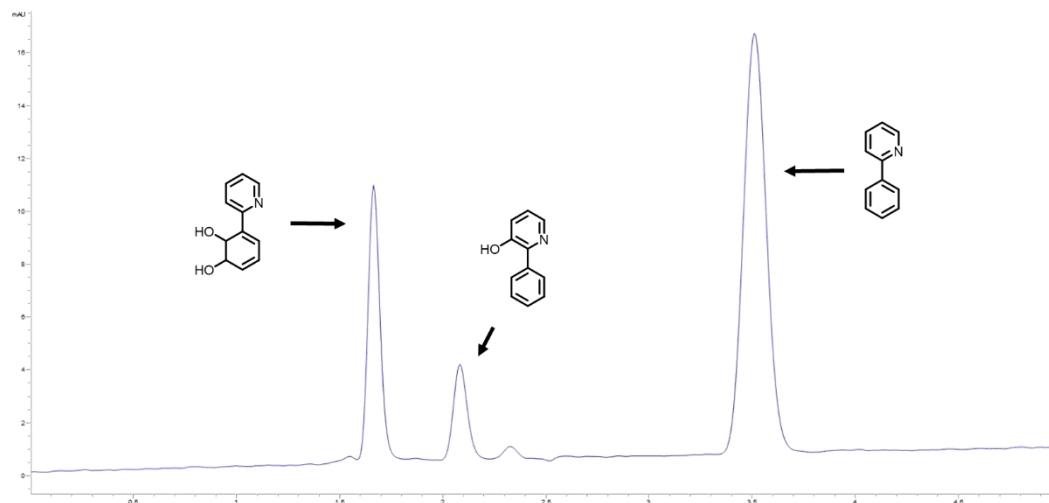

**Supplementary Fig. 18: DAD chromatogram of CDO wild-type catalyzed biotransformation of 2-phenylpyridine at a wavelength of 210 nm.**

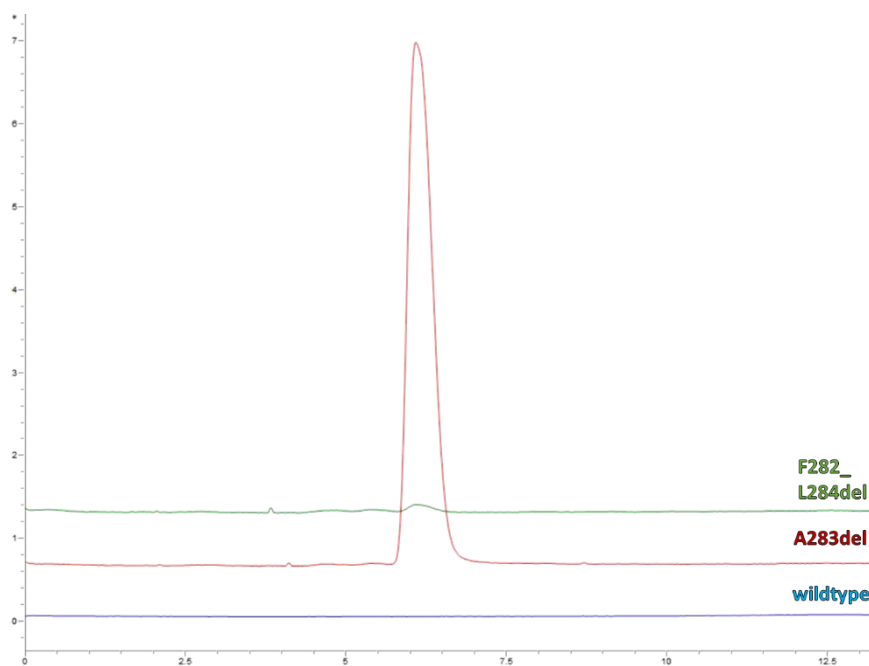

**Supplementary Fig. 19: LC-MS spectrum of the biotransformation of phenazone in SIM-mode ( $m/z$  222).** Comparison between the wild-type (blue, bottom line) with no product formation, F282\_L284del (green, top line) with product traces and A283del (red, middle line) with clear product formation.

## Product formations and distribution

The quantification of the different products was performed with biphenyl as internal standard under the same conditions as the corresponding biotransformations. 1 M DMSO stocks of the corresponding products were applied for standard solutions, incubated, extracted and analyzed. LC/MS analysis of the in-house standard of 1,2-dihydroxy-3-(2'-pyridyl)-cyclohexa-3,5-diene (**3a**) showed traces of 2-phenyl-pyridine-5-ol (**3b**). Based on the corresponding calibration curve, the amount of 2-phenyl-pyridine-5-ol was subtracted from the used concentration of 1,2-dihydroxy-3-(2'-pyridyl)-cyclohexa-3,5-diene standard to ensure correct concentrations.

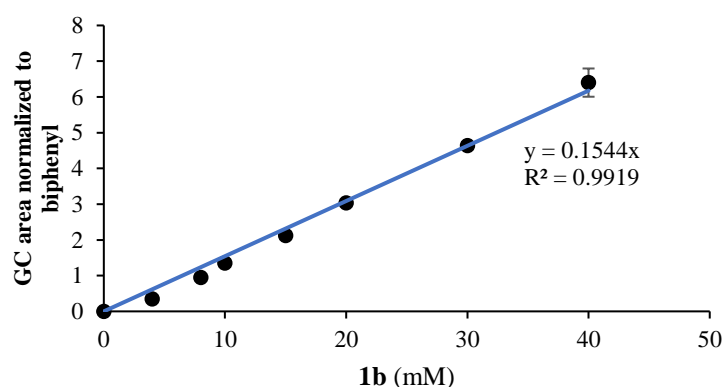

**Supplementary Fig. 20. Calibration curve of 1-phenyl-1,2-ethandiol (1b).** Data acquisition was performed in technical triplicates per concentration with average values and standard deviations (calculated using Excel version 2016) are indicated. Error bars may be covered by markers. Source data are provided as a Source Data file.

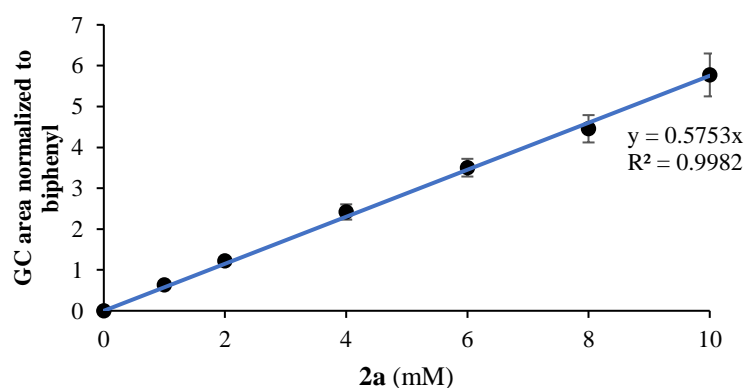

**Supplementary Fig. 21. Calibration curve of the mixture of isomers of (-)-carveol (2a).** Data acquisition was performed in technical triplicates per concentration with average values and standard deviations (calculated using Excel version 2016) are indicated. Error bars may be covered by markers. Source data are provided as a Source Data file.

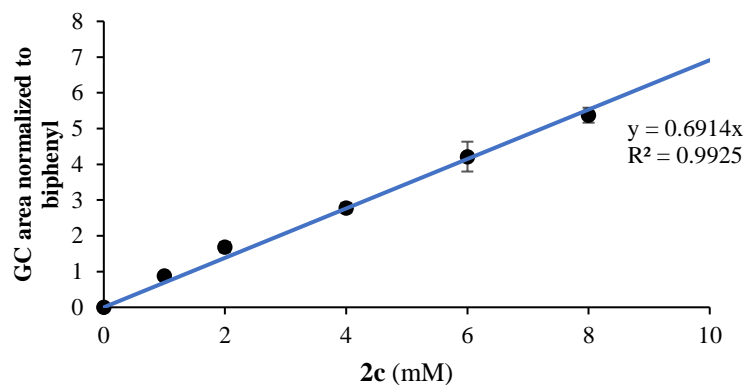

**Supplementary Fig. 22. Calibration curve of (+)-perillyl alcohol (2c).** Data acquisition was performed in technical triplicates per concentration with average values and standard deviations (calculated using Excel version 2016) are indicated. Error bars may be covered by markers. Source data are provided as a Source Data file.

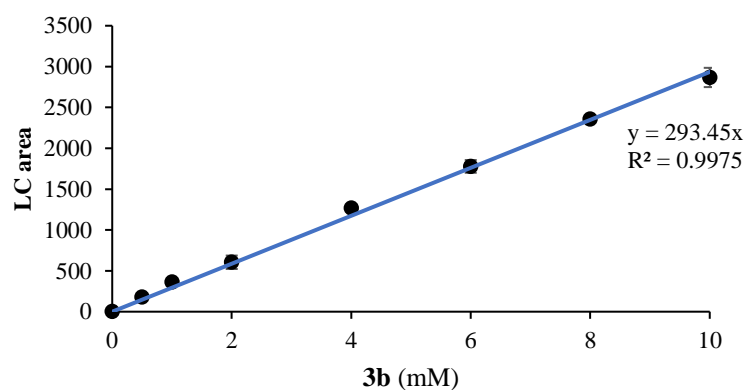

**Supplementary Fig. 23. Calibration curve of 2-phenyl-pyridine-5-ol (3b).** Data acquisition was performed in technical triplicates per concentration with average values and standard deviations (calculated using Excel version 2016) are indicated. Error bars may be covered by markers. Source data are provided as a Source Data file.



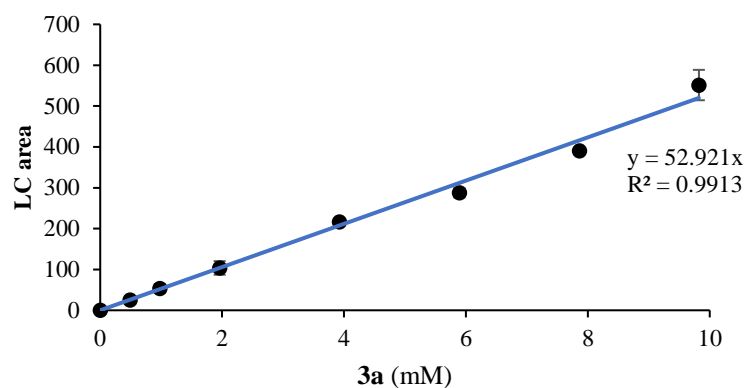

**Supplementary Fig. 24. Calibration curve of 1,2-dihydroxy-3-(2'-pyridyl)-cyclohexa-3,5-diene (3a).** Data acquisition was performed in technical triplicates per concentration with average values and standard deviations (calculated using Excel version 2016) are indicated. Error bars may be covered by markers. Source data are provided as a Source Data file.

The product 3-vinylcyclohexa-3,5-diene-1,2-diol **1a** polymerizes when concentrated in vacuo, so the synthesis of a standard for quantification is not possible. Also, the synthesis of (+)-mentha-1.8-dien-10-ol **2b** yielded a standard with impurities with perillyl alcohol, despite repeated column chromatography. To ensure correct quantification, we used the relative response factor to determine the concentrations in reference to a standard.<sup>7,8</sup> For **1a**, we used **1b** as standard, while **2c** was applied as reference standard for **2b**. The RF values were calculated from the effective carbon numbers (ECN) of the respective compound (ECN<sub>X</sub>) in relation the the ECN of the standard (ECN<sub>STD</sub>) with equation (1).

$$RF = \frac{ECN_X}{ECN_{STD}} \quad (1)$$

Calibration curves were determined by the quantification of the analytes by external calibration and normalization by the calculated RF values (Supplementary Table 12).

**Supplementary Table 12: Calculated ECN and RF values.**

| Compound | ECN | RF    |
|----------|-----|-------|
| 1a       | 6.2 | 0.919 |
| 1b       | 6.5 |       |
| 2b       | 9.3 | 1     |
| 2c       | 9.3 |       |

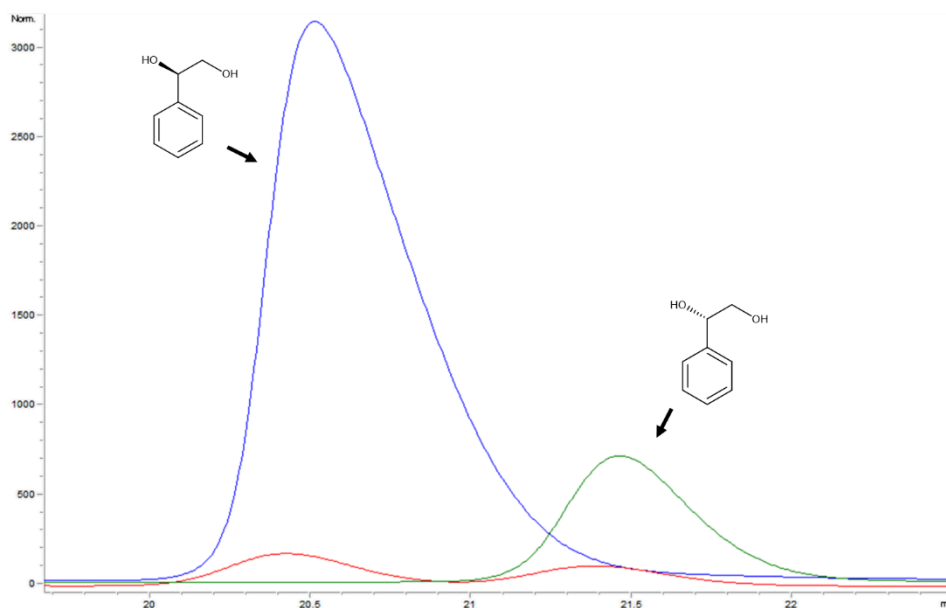

**Supplementary Fig. 25: Chiral HPLC analysis of 1-phenyl-1,2-ethandiol 1b enantiomers of the commercially available standards of (*R*)-1b (blue, Sigma Aldrich, 99 % optical purity), (*S*)-1b (green, Sigma Aldrich, 99 % optical purity) and the RO-catalyzed biotransformation of 1 (red).**

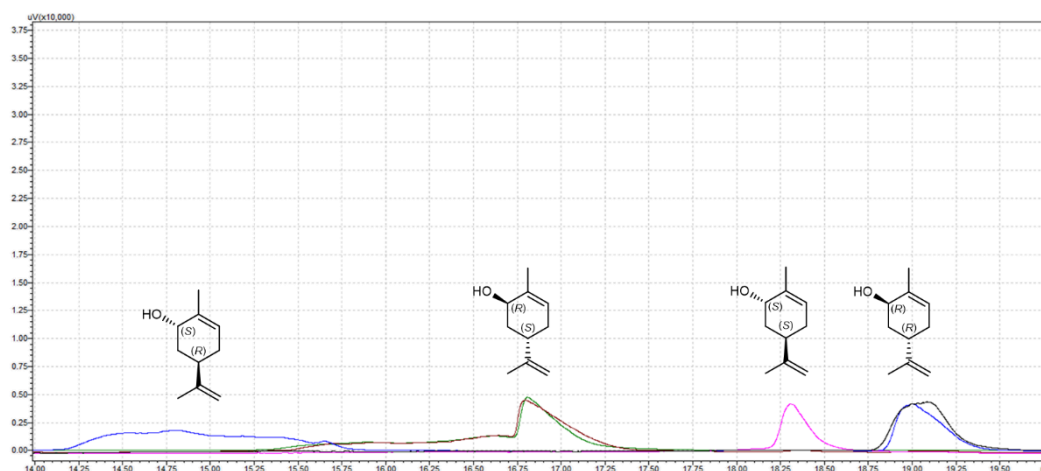

**Supplementary Fig. 26: Chiral GC-FID analysis of carveol 2a enantiomers.** Commercially available isomer mixture of (-)-carveol (black, Sigma Aldrich, 97 %) containing (1*S*,5*R*)-**2a** and (1*R*,5*R*)-**2a**. (1*S*,5*S*)-carveol (pink) from our in-house library, synthesis according to Bermejo *et al.*<sup>1,9</sup> (1*R*,5*R*)-carveol (blue) from our in-house library, synthesis according to Dhulut *et al.*<sup>1,10</sup> (1*R*,5*S*)-carveol (green) derived from CDO\_M232A-catalyzed biotransformation of **1**.<sup>1</sup> (1*R*,5*S*)-carveol (red) derived from CDO wild-type-catalyzed biotransformation of **1**.

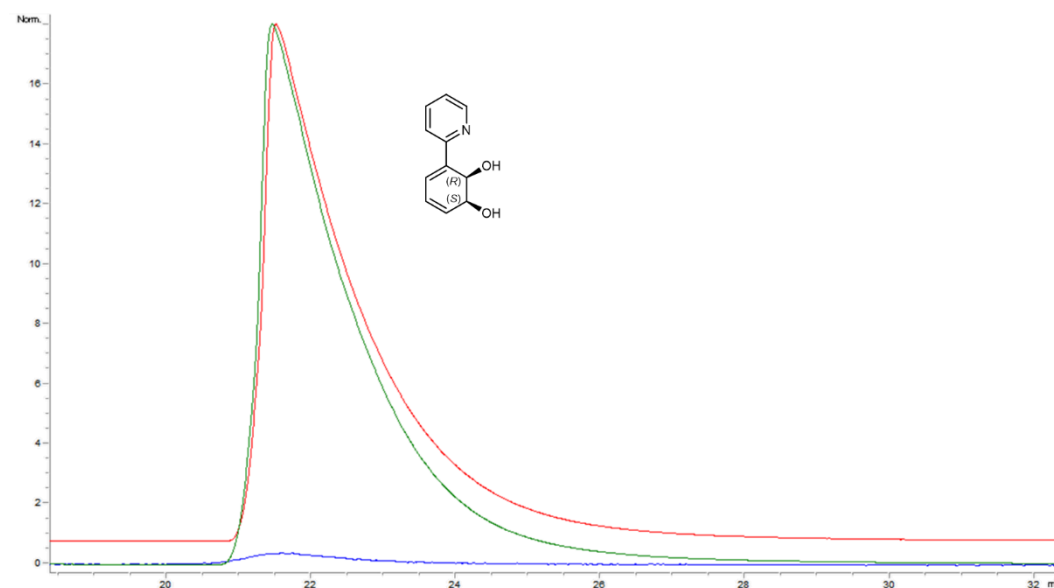

**Supplementary Fig. 27: Chiral HPLC analysis of (1*S*,2*R*)-1,2-dihydroxy-3-(2'-pyridyl)-cyclohexa-3,5-diene **3a** with normal phase CHIRALPAK IB column. CDO wild-type (blue) and CDO\_A283del (red) catalyzed biotransformation of **3**. In-house standard of (1*S*,2*R*)-**3a** (green).**

We also evaluated a normal phase CHIRALPAK IC (250 mm x 4.6 mm, 5  $\mu$ m particle size, Daicel (Europa) GmbH, Raunheim, Germany) for additional enantiomers of (1*S*,2*R*)-1,2-dihydroxy-3-(2'-pyridyl)-cyclohexa-3,5-diene. 6  $\mu$ l sample were injected and the compounds were separated with 1.4 ml/min isocratic mobile phase of 90:10 n-hexane/isopropanol at 30  $^{\circ}$ C on the same normal phase HPLC-DAD system mentioned in the methods section. Analysis was performed using the DAD at a wavelength of 310 nm. Despite a length of 90 min and previously successful separation of enantiomers of similar products with this column, no additional peak was observed.

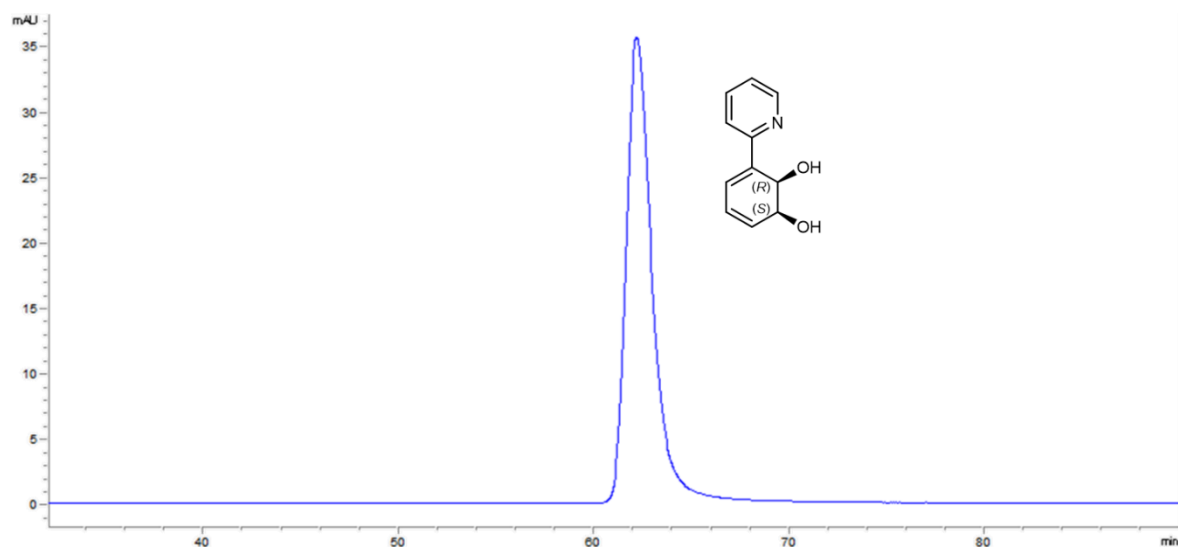

**Supplementary Fig. 28: Chiral HPLC analysis of (1*S*,2*R*)-1,2-dihydroxy-3-(2'-pyridyl)-cyclohexa-3,5-diene **3a** with normal phase CHIRALPAK IC column. CDO wild-type (blue) and CDO\_A283del (red) catalyzed biotransformation of **3**. In-house standard of (1*S*,2*R*)-**3a** (green).**

## Primers

**Supplementary Table 13: Sequencing primers used in this study.**

| Name          | Sequence (5' → 3')  |
|---------------|---------------------|
| pIP107D_seq1f | GATATGTACCATGCGGG   |
| pIP107D_seq2f | CCAAAATGTACAGCTGTG  |
| pIP107D_seq3f | GTGGATTTGCAGGTCGG   |
| pIP107D_seq4f | GCCGCTGAAGATATATCCG |
| pIP107D_seq5f | GGTATCGCATGTGAGC    |

**Supplementary Table 14: Site-directed mutagenesis primers used for the alanine scan.**

| Mutation     | Name     | Sequence (5' → 3')                              |
|--------------|----------|-------------------------------------------------|
| <b>G236A</b> | G236A_fw | GATATGTACCATGCGGCAACGATGGCGCATCTT               |
|              | G236A_rv | GCGCCATCGTTGCCGCATGGTACATATC                    |
| <b>T237A</b> | T237A_fw | GCGGGAGCGATGGCGCATCTTTC                         |
|              | T237A_rv | GAAAGATGCGCCATCGCTCCCGC                         |
| <b>M238A</b> | M238A_fw | GTACCATGCGGGAACGGCGGCATCTTTCAGGT                |
|              | M238A_rv | ACCTGAAAGATGCGCCCGCTTCCCGCATGGTAC               |
| <b>A239G</b> | A239G_fw | GGAACGATGGGCCATCTTTCAG                          |
|              | A239G_rv | CTGAAAGATGGCCCATCGTTCC                          |
| <b>H240A</b> | H240A_fw | CATGCGGGAACGATGGCGGCTCTTTCAGGTGTATTGTC          |
|              | H240A_rv | GACAATACACCTGAAAGAGCCGCATCGTTCCCGCATG           |
| <b>L241A</b> | L241A_fw | GGACAATACACCTGAAGCATGCGCCATCGTTCCCG             |
|              | L241A_rv | CGGGAACGATGGCGCATGCTTCAGGTGTATTGTCC             |
| <b>D242A</b> | D242A_fw | GGGAACGATGGCGCATCTTTCAGGTGTATTGTCCAGCCTCCCG     |
|              | D242A_rv | AAGATGCGCCATCGTTCCCGCATGGTACATATCGCTACAGAATTG   |
| <b>G243G</b> | G243G_fw | GAACGATGGCGCATCTTTCAGCTGTATTGTCCAGCCTCCCGCC     |
|              | G243G_rv | CTGAAAGATGCGCCATCGTTCCCGCATGGTACATATCGCTACAGAAT |
| <b>V244A</b> | V244A_fw | GATGGCGCATCTTTCAGGTGCATTGTCCAGCCTCCCGCC         |
|              | V244A_rv | CACCTGAAAGATGCGCCATCGTTCCCGCATGGTACATATCGC      |
| <b>L245A</b> | L245A_fw | GATGGCGCATCTTTCAGGTGTAGCGTCCAGCCTCCCGCCTG       |
|              | L245A_rv | TACACCTGAAAGATGCGCCATCGTTCCCGCATGGTACATATCGC    |
| <b>S246A</b> | S246A_fw | GCGCATCTTTCAGGTGTATTGGCCAGCCTCCCGCCTGAAATG      |
|              | S246A_rv | CAATACACCTGAAAGATGCGCCATCGTTCCCGCATGGTACATATCG  |
| <b>S247A</b> | S247A_fw | GCATCTTTCAGGTGTATTGTCCGCCCTCCCGCCTGAAATGGATTGTC |
|              | S247A_rv | GGACAATACACCTGAAAGATGCGCCATCGTTCCCGCATGGTAC     |
| <b>L248A</b> | L248A_fw | GGTGTATTGTCCAGCGCCCCGCCTGAAATGGATT              |
|              | L248A_rv | AATCCATTTTCAGGCGGGGCGCTGGACAATACACC             |
| <b>P249A</b> | P249A_fw | GTATTGTCCAGCCTCGCGCCTGAAATGG                    |
|              | P249A_rv | CCATTTTCAGGCGCGAGGCTGGACAATAC                   |
| <b>P250A</b> | P250A_fw | TTGTCCAGCCTCCCGGCTGAAATGGATTGTC                 |
|              | P250A_rv | GACAAATCCATTTTCAGCCGGGAGGCTGG                   |
| <b>E251A</b> | E251A_fw | CAGCCTCCCGCCTGCAATGGATTTGTCCC                   |
|              | E251A_rv | GGGACAAATCCATTGCAGGCGGGAGGCTG                   |
| <b>M252A</b> | M252A_fw | CAGCCTCCCGCCTGAAGCGGATTTGTCCAAGTAAAG            |
|              | M252A_rv | CTTTACTTGGGACAAATCCGCTTCAGGCGGGAGGCTG           |

|              |          |                                               |
|--------------|----------|-----------------------------------------------|
| <b>D253A</b> | D253A_fw | CCTCCCGCCTGAAATGGCTTTGTCCCAAGTAAAG            |
|              | D253A_rv | CTTTACTTGGGACAAAGCCATTTTCAGGCGGGAGG           |
| <b>L254A</b> | L254A_fw | CTCCCGCCTGAAATGGATGCGTCCCAAGTAAAGTTAC         |
|              | L254A_rv | GTAACCTTTACTTGGGACGCATCCATTTTCAGGCGGGAG       |
| <b>S255A</b> | S255A_fw | CGCCTGAAATGGATTTGGCCCAAGTAAAGTTACCG           |
|              | S255A_rv | GTAACCTTTACTTGGGCCAAATCCATTTTCAGGCG           |
| <b>Q256A</b> | Q256A_fw | CGCCTGAAATGGATTTGTCCGCAGTAAAGTTACCGTCAAGTG    |
|              | Q256A_rv | CACCTTGACGGTAACTTTACTGCGGACAAATCCATTTTCAGGCG  |
| <b>V257A</b> | V257A_fw | GGATTTGTCCCAAGCAAAGTTACCGTCAAGTGG             |
|              | V257A_rv | CCACTTGACGGTAACTTTGTCTGGGACAAATCCATTTTC       |
| <b>K258A</b> | K258A_fw | GATTTGTCCCAAGTAGCGTTACCGTCAAGTG               |
|              | K258A_rv | CACCTTGACGGTAACTTTACTTGGGACAAATC              |
| <b>L259A</b> | L259A_fw | CCTGAAATGGATTTGTCCCAAGTAAAGGCACCGTCAAGTGGG    |
|              | L259A_rv | CCCCTTGACGGTGCCTTTACTTGGGACAAATCCATTTTCAGG    |
| <b>P260A</b> | P260A_fw | GATTTGTCCCAAGTAAAGTTAGCGTCAAGTGGG             |
|              | P260A_rv | CCCCTTGACGCTAACTTTACTTGGGACAAATC              |
| <b>S261A</b> | S261A_fw | CAAGTAAAGTTACCGGCAAGTGGGAATCAG                |
|              | S261A_rv | CTGATTCCCCTTGCCGGTAACTTTACTTTG                |
| <b>S262A</b> | S262A_fw | CCAAGTAAAGTTACCGTCAAGTGGGAATCAGTTCC           |
|              | S262A_rv | GAACTGATTCCCAGCTGACGGTAACTTTACTTGGGAC         |
| <b>G263A</b> | G263A_fw | GTTACCGTCAAGTGCGAATCAGTTCCGGGC                |
|              | G263A_rv | GCCCCGAACTGATTTCGCACTTGACGGTAACT              |
| <b>N264A</b> | N264A_fw | GTTACCGTCAAGTGGGGCTCAGTTCCGGGCTAAGTG          |
|              | N264A_rv | CACCTTAGCCCCGAACTGAGCCCCACTTGACGGTAACT        |
| <b>F278A</b> | F278A_fw | GACATGGGACCGGCTGGGCCAATGACGATTTTCGCAC         |
|              | F278A_rv | GTGCGAAATCGTCATTGGCCCAGCCGGTCCCATGTC          |
| <b>N279A</b> | N279A_fw | CATGGGACCGGCTGGTTTCGCTGACGATTTTCGCACTTC       |
|              | N279A_rv | GAAGTGCGAAATCGTCAGCGAACCAGCCGGTCCCATG         |
| <b>D280A</b> | D280A_fw | CTGGTTCAATGCCGATTTTCGCAC                      |
|              | D280A_rv | GTGCGAAATCGGCATTGAACCAG                       |
| <b>D281A</b> | D281A_fw | CGGCTGGTTCAATGACGCTTTTCGCACTTCTGCAAG          |
|              | D281A_rv | CTTGCGAAGTGCGAAAGCGTCATTGAACCAGCCG            |
| <b>F282A</b> | F282A_fw | CAATGACGATGCCGCACTTCTGCG                      |
|              | F282A_rv | GCAGAAGTGCGGCATCGTCATTG                       |
| <b>A283G</b> | A283G_fw | GTTCAATGACGATTTTCGGACTTCTGCAAGCCATC           |
|              | A283G_rv | GATGGCTTGCAGAAGTCCGAAATCGTCATTGAAC            |
| <b>L284A</b> | L284A_fw | GTTCAATGACGATTTTCGCAAGTGCAGCTTCTGCAAGCCATCATG |
|              | L284A_rv | GATGGCTTGCAGAGCTGCGAAATCGTCATTGAACCAG         |
| <b>L285A</b> | L285A_fw | GACCCATGATGGCTTGCGCAAGTGCGAAATCGTCATTG        |
|              | L285A_rv | CAATGACGATTTTCGCACTTGCAGCAAGCCATCATGGGTC      |
| <b>Q286A</b> | Q286A_fw | GACGATTTTCGCACTTCTGGCAGCCATCATGGGTCC          |
|              | Q286A_rv | GGACCCATGATGGCTGCCAGAAGTGCGAAATCGTC           |
| <b>A287G</b> | A287G_fw | CGCACTTCTGCAAGCAATCATGGGTCCCTAAGG             |
|              | A287G_rv | CCTTAGGACCCATGATTGCTTGCAGAAGTGC               |
| <b>I288A</b> | I288A_fw | CGCACTTCTGCAAGCCGCCATGGGTCCCTAAGGTTG          |
|              | I288A_rv | CAACCTTAGGACCCATGGCGGCTTGCAGAAGTGC            |
| <b>M289A</b> | M289A_fw | CACCTTCTGCAAGCCATCGCGGGTCCCTAAGGTTGTGCG       |
|              | M289A_rv | CGACAACCTTAGGACCCGCGATGGCTTGCAGAAGTG          |
| <b>G290A</b> | G290A_fw | CTGCAAGCCATCATGGCTCCCTAAGGTTGTGCGATTAC        |
|              | G290A_rv | CGACAACCTTAGGAGCCATGATGGCTTGCAG               |

**Supplementary Table 15: Site-directed mutagenesis primers used for saturation of selected loop positions**

| Mutation       | Name       | Sequence (5' → 3')                        |
|----------------|------------|-------------------------------------------|
| <b>F278NNK</b> | F278NNK_fw | CATGGGACCGGCTGGNNKAATGACGATTTTCGCAC       |
|                | F278NNK_rv | GTGCGAAATCGTCATTMNCCAGCCGGTCCCATG         |
| <b>D280NNK</b> | D280NNK_fw | GACCGGCTGGTTCAATNNKGATTTTCGCACTTCTG       |
|                | D280NNK_rv | CAGAAGTGCGAAATCMNNATTGAACCAGCCGGTC        |
| <b>D281NNK</b> | D281NNK_fw | CGGCTGGTTCAATGACNNKTTTCGCACTTCTGCAAG      |
|                | D281NNK_rv | CTTGCAGAAAGTGCGAAMNNGTCATTGAACCAGCC       |
| <b>F282NNK</b> | F282NNK_fw | CTGGTTCAATGACGATNNKGCACCTTCTGCAAGCC       |
|                | F282NNK_rv | GGCTTGCAGAAAGTGCMMNATCGTCATTGAACCAG       |
| <b>A283NNK</b> | A283NNK_fw | GTTCAATGACGATTTTCNNKCTTCTGCAAGCCATC       |
|                | A283NNK_rv | GATGGCTTGCAGAAAGMNGAAATCGTCATTGAAC        |
| <b>L284NNK</b> | L284NNK_fw | CAATGACGATTTTCGCANNKCTGCAAGCCATCATGG      |
|                | L284NNK_rv | CCATGATGGCTTGCAGMNTGCGAAATCGTCATTG        |
| <b>L285NNK</b> | L285NNK_fw | CAATGACGATTTTCGCACTTNNKCAAGCCATCATGGGTC   |
|                | L285NNK_rv | GACCCATGATGGCTTGMNNAAGTGCGAAATCGTCATTG    |
| <b>Q286NNK</b> | Q286NNK_fw | CGATTTTCGCACTTCTGNKGGCCATCATGGGTCCTAAG    |
|                | Q286NNK_rv | CTTAGGACCCATGATGGCMNNCAGAAGTGCGAAATCG     |
| <b>A287NNK</b> | A287NNK_fw | GATTTTCGCACTTCTGCAANNKATCATGGGTCCTAAGGTTG |
|                | A287NNK_rv | CAACCTTAGGACCCATGATMNTTGCAGAAAGTGCGAAATC  |
| <b>I288NNK</b> | I288NNK_fw | CGCACTTCTGCAAGCCNNKATGGGTCCTAAGGTTGTC     |
|                | I288NNK_rv | GACAACCTTAGGACCCATMNNGGCTTGCAGAAAGTGCG    |
| <b>M289NNK</b> | M289NNK_fw | GCACTTCTGCAAGCCATCNNKGGTCTAAGGTTGTGCG     |
|                | M289NNK_rv | CGACAACCTTAGGACCMNNGATGGCTTGCAGAAAGTGC    |

**Supplementary Table 16: Site-directed mutagenesis primers used for the adaption library based on the sequence alignment with oxygenases from *Phenylobacterium immobile* E.**

| Mutation       | Name       | Sequence (5' → 3')                     |
|----------------|------------|----------------------------------------|
| <b>T237del</b> | T237del_fw | GTACCATGCGGGAACGGCGCATCTTTTCAGG        |
|                | T237del_rv | CCTGAAAGATGCGCCGTTCCCGCATGGTAC         |
| <b>M238del</b> | M238del_fw | GTACCATGCGGGAATGGCGCATCTTTTC           |
|                | M238del_rv | GAAAGATGCGCCATTTCCCGCATGGTAC           |
| <b>T237I</b>   | T237I_fw   | GATATGTACCATGCGGGAATAATGGCGCATC        |
|                | T237I_rv   | GATGCGCCATTATTTCCCGCATGGTACATATC       |
| <b>A239S</b>   | A239S_fw   | CATGCGGGAACGATGTCGCATCTTTTCAGGTG       |
|                | A239S_rv   | CACCTGAAAGATGCGACATCGTTCCCGCATG        |
| <b>L245M</b>   | L245M_fw   | CATCTTTTCAGGTGTAATGTCCAGCCTCCCGC       |
|                | L245M_rv   | GCGGGAGGCTGGACATTACACCTGAAAGATG        |
| <b>S247G</b>   | S247G_fw   | CTTTCAGGTGTATTGTCCGGCCTCCCGCCTGAAATG   |
|                | S247G_rv   | CATTTTCAGGCGGGAGGCCGACAATACACCTGAAAG   |
| <b>L248F</b>   | L248F_fw   | GGTGTATTGTCCAGCTTCCCGCCTGAAATGGATTTG   |
|                | L248F_rv   | CAAATCCATTTTCAGGCGGGAAAGCTGGACAATACACC |
| <b>P249R</b>   | P249R_fw   | GTGTATTGTCCAGCCTCCGTCTGAAATGGATTTG     |
|                | P249R_rv   | CAAATCCATTTTCAGGACGGAGGCTGGACAATACAC   |
| <b>S255L</b>   | S255L_fw   | CCTGAAATGGATTTGCTGCAAGTAAAGTTACCG      |
|                | S255L_rv   | CGGTAACCTTACTTGCAGCAAATCCATTTTCAGG     |
| <b>F266H</b>   | F266H_fw   | GTCAAGTGGGAATCAGCACCGGGCTAAGTGGGGTG    |
|                | F266H_rv   | CACCCCACTTAGCCCGGTGCTGATTCCCACTTGAC    |

|              |          |                                       |
|--------------|----------|---------------------------------------|
| <b>A268V</b> | A268V_fw | GAATCAGTTCGGGGTAAAGTGGGGTGGACATG      |
|              | A268V_rv | CATGTCCACCCCACTTAACCCGGAAGTATTC       |
| <b>W270L</b> | W270L_fw | CAGTTCGGGGCTAAGCTGGGTGGACATGGGACC     |
|              | W270L_rv | GGTCCCATGTCCACCCAGCTTAGCCCGGAAGTGG    |
| <b>H273Y</b> | H273Y_fw | GCTAAGTGGGGTGGATATGGGACCGGCTGGTTC     |
|              | H273Y_rv | GAACCAGCCGGTCCCATATCCACCCCACTTAGC     |
| <b>T275H</b> | T275H_fw | GTGGGGTGGACATGGGCACGGCTGGTTCAATGAC    |
|              | T275H_rv | GTCATTGAACCAGCCGTGCCCATGTCCACCCAC     |
| <b>G276A</b> | G276A_fw | GGTGGACATGGGACCGCCTGGTTCAATGACGATTTTC |
|              | G276A_rv | GAAATCGTCATTGAACCAGCGGTCCCATGTCCACC   |
| <b>W277I</b> | W277I_fw | GGACATGGGACCGGCATTTTCAATGACGATTTTC    |
|              | W277I_rv | GAAATCGTCATTGAAAATGCCGGTCCCATGTCC     |
| <b>F278G</b> | F278G_fw | CATGGGACCGGCTGGGGCAATGACGATTTTCGC     |
|              | F278G_rv | GCGAAAATCGTCATTGCCCCAGCCGGTCCCATG     |
| <b>D280E</b> | D280E_fw | GACCGGCTGGTTCAATGAAGATTTTCGCACTTCTG   |
|              | D280E_rv | CAGAAGTGCGAAATCTTCATTGAACCAGCCGGTC    |
| <b>D281E</b> | D281E_fw | GGCTGGTTCAATGACGAATTCGCACTTCTGCAAG    |
|              | D281E_rv | CTTGCAGAAGTGCGAATTCGTCATTGAACCAGCC    |

**Supplementary Table 17: Site-directed insertion mutagenesis primers used for the adaption library based on the sequence alignment with oxygenases from *Phenylobacterium immobile* E.**

| <b>Mutation</b>                        | <b>Name</b>         | <b>Sequence (5' → 3')</b>                                        |
|----------------------------------------|---------------------|------------------------------------------------------------------|
| <b>V257_K258<br/>insED</b>             | V257InsED_fw        | GGATTTGTCCCAAGTAGAAGACAAGTTACCGTCAAGTGG                          |
|                                        | V257InsED_rv        | CCACTTGACGGTAACTTGTCTTCTACTTGGGACAAATCC                          |
| <b>V257_K258<br/>insEDQE</b>           | V257InsEDQE_fw      | GGATTTGTCCCAAGTAGAAGACCAGGAAAAGTTACCGTCAA<br>GTGG                |
|                                        | V257InsEDQE_rv      | CCACTTGACGGTAACTTTTCTTCTACTTGGGACAA<br>ATCC                      |
| <b>V257_K258<br/>insEDQEL<br/>A</b>    | V257InsEDQELA_fw    | GGATTTGTCCCAAGTAGAAGACCAGGAACTGGCGAAGTTAC<br>CGTCAAGTGG          |
|                                        | V257InsEDQELA_rv    | CCACTTGACGGTAACTTCGCCAGTTCCTGGTCTTCTACTTG<br>GGACAAATCC          |
| <b>V257_K258<br/>insEDQEL<br/>ARI</b>  | V257InsEDQELARI_fw  | GGATTTGTCCCAAGTAGAAGACCAGGAACTGGCGCGTATTA<br>AGTTACCGTCAAGTGG    |
|                                        | V257InsEDQELARI_rv  | CCACTTGACGGTAACTTAATACGCGCCAGTTCCTGGTCTTC<br>TACTTGGGACAAATCC    |
| <b>V257_K258<br/>insEDQEL<br/>ARIA</b> | V257InsEDQELARIA_fw | GGATTTGTCCCAAGTAGAAGACCAGGAACTGGCGCGTATTG<br>CGAAGTTACCGTCAAGTGG |
|                                        | V257InsEDQELARIA_rv | CCACTTGACGGTAACTTCGCAATACGCGCCAGTTCCTGGTC<br>TTCTACTTGGGACAAATCC |
| <b>L259_P260<br/>insG</b>              | L259InsG_fw         | GATTTGTCCCAAGTAAAGTTAGGCCCGTCAAGTGGGAATC                         |
|                                        | L259InsG_rv         | GATTCCCCTTGACGGGCTAACTTTACTTGGGACAAATC                           |
| <b>P260_S261<br/>insG</b>              | L260InsG_fw         | GTCCCAAGTAAAGTTACCGGGCTCAAGTGGGAATCAG                            |
|                                        | L260InsG_rv         | CTGATTCCCCTTGACGGGCTAACTTTACTTGGGAC                              |
| <b>V257_K258<br/>insEE</b>             | V257InsEE_fw        | GGATTTGTCCCAAGTAGAAGAAAAGTTACCGTCAAGTGG                          |
|                                        | V257InsEE_rv        | CCACTTGACGGTAACTTTTCTTCTACTTGGGACAAATCC                          |
| <b>V257_K258<br/>insEERE</b>           | V257InsEERE_fw      | GGATTTGTCCCAAGTAGAAGAACGCGAAAAGTTACCGTCAA<br>GTGG                |
|                                        | V257InsEERE_rv      | CCACTTGACGGTAACTTTTCTTCTACTTGGGACAA<br>ATCC                      |



|                                                  |                   |                                                                  |
|--------------------------------------------------|-------------------|------------------------------------------------------------------|
| <b>V257_K258</b><br><b>insEEREL</b><br><b>A</b>  | V257InsEERELA_fw  | GGATTTGTCCCAAGTAGAAGAACGCGAACTGGCAAAGTTAC<br>CGTCAAGTGG          |
|                                                  | V257InsEERELA_rv  | CCACTTGACGGTAACTTTGCCAGTTCGCGTTCTTCTACTTG<br>GGACAAATCC          |
| <b>V257_K258</b><br><b>insEEREL</b><br><b>AA</b> | V257InsEERELAA_fw | GGATTTGTCCCAAGTAGAAGAACGCGAACTGGCGGCAAAGT<br>TACCGTCAAGTGG       |
|                                                  | V257InsEERELAA_rv | CCACTTGACGGTAACTTTGCCGCCAGTTCGCGTTCTTCTAC<br>TTGGGACAAATCC       |
| <b>K258_L259</b><br><b>insAG</b>                 | K258InsAG_fw      | GATTTGTCCCAAGTAAAGGCGGGCTTACCGTCAAGTGGG                          |
|                                                  | K258InsAG_rv      | CCCACTTGACGGTAAAGCCCGCTTTACTTGGGACAAATC                          |
| <b>L259_P260</b><br><b>insA</b>                  | L259InsA_fw       | GATTTGTCCCAAGTAAAGTTAGCGCCGTCAAGTGGGAATC                         |
|                                                  | L259InsA_rv       | GATTTCCACTTGACGGCGCTAACTTTACTTGGGACAAATC                         |
| <b>P260_S261</b><br><b>insGS</b>                 | P260InsGS_fw      | GTCCCAAGTAAAGTTACCGGGTAGCTCAAGTGGGAATCAG                         |
|                                                  | P260InsGS_rv      | CTGATTTCCACTTGAGCTACCCGGTAACTTTACTTGGGAC                         |
| <b>P260_S261</b><br><b>insGG</b>                 | P260InsGG_fw      | GTCCCAAGTAAAGTTACCGGGTGGTTC AAGTGGGAATCAG                        |
|                                                  | P260InsGG_rv      | CTGATTTCCACTTGAACCACCCGGTAACTTTACTTGGGAC                         |
| <b>N279_D280</b><br><b>insE</b>                  | N279InsE_fw       | GGGACCGGCTGGTTCAATAACGACGATTTTCGCACTTC                           |
|                                                  | N279InsE_rv       | GAAGTGCGAAAATCGTCGTTATTGAACCAGCCGGTCCC                           |
| <b>Q286_A287</b><br><b>insKK</b>                 | Q286InsKK_fw      | CGATTTTCGCACTTCTGCAAAAAAAGCCATCATGGGTCCTA<br>AG                  |
|                                                  | Q286InsKK_rv      | CTTAGGACCCATGATGGCTTTTTTTTTGCAGAAGTGC GAAAT<br>CG                |
| <b>Q286_A287</b><br><b>insKKAA</b>               | Q286InsKKAA_fw    | CGATTTTCGCACTTCTGCAAAAAAAGCGGCGGCCATCATGG<br>GTCCTAAG            |
|                                                  | Q286InsKKAA_rv    | CTTAGGACCCATGATGGCCGCGCTTTTTTTTTGCAGAAGTG<br>CGAAATCG            |
| <b>Q286_A287</b><br><b>insKKAAE</b><br><b>G</b>  | Q286InsKKAAEG_fw  | CGATTTTCGCACTTCTGCAAAAAAAGCGGCGGAAGGCGCCA<br>TCATGGGTCCCTAAG     |
|                                                  | Q286InsKKAAEG_rv  | CTTAGGACCCATGATGGCGCCTTCCGCGCTTTTTTTTTGCA<br>GAAGTGCGAAAATCG     |
| <b>F278_N279</b><br><b>insGP</b>                 | F278InsGP_fw      | CATGGGACCGGCTGGTTCGGCCAAATGACGATTTTCGCAC                         |
|                                                  | F278InsGP_rv      | GTGCGAAATCGTCATTTGGGCCGAACCAGCCGGTCCCATG                         |
| <b>F278_N279</b><br><b>insGPRL</b>               | F278InsGPRL_fw    | CATGGGACCGGCTGGTTCGGCCACGTCTGAATGACGATTT<br>CGCAC                |
|                                                  | F278InsGPRL_rv    | GTGCGAAATCGTCATTCAGACGTGGGCCGAACCAGCCGGTC<br>CCATG               |
| <b>Q286_A287</b><br><b>insEM</b>                 | N279InsP_fw       | GGGACCGGCTGGTTC AATCCGACGATTTTCGCACTTC                           |
|                                                  | N279InsP_rv       | GAAGTGCGAAAATCGTCCGATTGAACCAGCCGGTCCC                            |
| <b>Q286_A287</b><br><b>insEM</b>                 | Q286InsEM_fw      | CGATTTTCGCACTTCTGCAAGAAATGGCCATCATGGGTCCTA<br>AG                 |
|                                                  | Q286InsEM_rv      | CTTAGGACCCATGATGGCCATTTCTTGCAGAAGTGC GAAAT<br>CG                 |
| <b>Q286_A287</b><br><b>insEMKA</b>               | Q286InsEMKA_fw    | CGATTTTCGCACTTCTGCAAGAAATGAAAGCCGCCATCATGG<br>GTCCTAAG           |
|                                                  | Q286InsEMKA_rv    | CTTAGGACCCATGATGGCGGCTTTCATTTCTTGCAGAAGTG<br>CGAAATCG            |
| <b>Q286_A287</b><br><b>insEMKAE</b><br><b>G</b>  | Q286InsEMKAEG_fw  | CGATTTTCGCACTTCTGCAAGAAATGAAAGCCGAAGGCGCCA<br>TCATGGGTCCCTAAG    |
|                                                  | Q286InsEMKAEG_rv  | CTTAGGACCCATGATGGCGCCTTCCGCTTTCATTTCTTGC<br>GAAGTGCGAAAATCG      |
| <b>Q286_A287</b>                                 | Q286InsEMKAEGK_fw | CGATTTTCGCACTTCTGCAAGAAATGAAAGCCGAAGGCAAAG<br>CCATCATGGGTCCCTAAG |

|                 |                   |                                           |
|-----------------|-------------------|-------------------------------------------|
| <b>insEMKAE</b> | Q286InsEMKAEGK_rv | CTTAGGACCCATGATGGCTTTGCCTTCGGCTTTCATTTCTT |
| <b>GK</b>       |                   | GCAGAAGTGCGAAATCG                         |

**Supplementary Table 18: Site-directed mutagenesis primers used for the deletion variants.** \* = mutations incorporated by overlap PCR

| <b>Mutation</b>        | <b>Name</b>   | <b>Sequence (5' → 3')</b>                       |
|------------------------|---------------|-------------------------------------------------|
| <b>E251del</b>         | P250DelE_fw   | GTCCAGCCTCCCGCCTATGGATTTGTCCCAAGTAAAGTTACCG     |
|                        | P250DelE_rv   | AGGCGGGAGGCTGGACAATACACCTGAAAGATGCGCCATC        |
|                        | P249DelPEM_   | CAGGTGTATTGTCCAGCCTCCCGGATTTGTCCCAAGTAAAGTTACC  |
| <b>P250_M252 del</b>   | fw            |                                                 |
|                        | P249DelPEM_rv | GGTAACTTTACTTGGGACAAATCCGGGAGGCTGGACAATACACCTG  |
| <b>L248_L254 del *</b> | S247DelLPPE   | CGCATCTTTCAGGTGTATTGTCCAGCTCCCAAGTAAAGTTACCGTCA |
|                        | MDL_fw        | AGTGGG                                          |
|                        | S247DelLPPE   | GCTGGACAATACACCTGAAAGATGCGCCATCGTTCCCGCATGGTACA |
| <b>V257del</b>         | MDL_rv        | TATC                                            |
|                        | Q256DelV_fw   | GCCTGAAATGGATTTGTCCAAAAGTTACCGTCAAGTGGGAATCAGT  |
|                        | TC            |                                                 |
| <b>Q256_K258 del</b>   | Q256DelV_rv   | TTGGGACAAATCCATTTTCAGGCGGGAGGCTGGACAATACACCTG   |
|                        | S255DelQVK_   | CGCCTGAAATGGATTTGTCTTACCGTCAAGTGGGAATCAGTTCCG   |
|                        | fw            |                                                 |
| <b>L254_P260 del *</b> | S255DelQVK_rv | GGACAAATCCATTTTCAGGCGGGAGGCTGGACAATACACCTGAAAG  |
|                        | D253DelLSQ    | GCCTCCCGCCTGAAATGGATTCAAGTGGGAATCAGTTCCGGGCTAAG |
|                        | VKLP_fw       |                                                 |
| <b>A283del</b>         | D253DelLSQ    | ATCCATTTTCAGGCGGGAGGCTGGACAATACACCTGAAAGATGCGCC |
|                        | VKLP_rv       |                                                 |
|                        | F282DelA_fw   | GGCTGGTTCAATGACGATTTCTTCTGCAAGCCATCATGGGTTC     |
| <b>F282_L284 del</b>   | F282DelA_rv   | GAAATCGTCATTGAACCAGCCGGTCCCATGTCCACCCAC         |
|                        | D281DelFAL_   | CCGGCTGGTTCAATGACGATCTGCAAGCCATCATGGGTTC        |
|                        | fw            |                                                 |
| <b>D280_Q286 del *</b> | D281DelFAL_rv | TCGTTCATTGAACCAGCCGGTCCCATGTCCACCCCACTTAGC      |
|                        | N279DelIDDF   | CATGGGACCGGCTGGTTCAATGCCATCATGGGTCCCTAAGTTGTCTG |
|                        | ALLQ_fw       |                                                 |
|                        | N279DelIDDF   | ATTGAACCAGCCGGTCCCATGTCCACCCCACTTAGCCCGG        |
|                        | ALLQ_rv       |                                                 |

**Supplementary Table 19: Site-directed mutagenesis primers used for the LILI library after position V257.**

| <b>Mutation</b>                     | <b>Name</b>               | <b>Sequence (5' → 3')</b>                                 |
|-------------------------------------|---------------------------|-----------------------------------------------------------|
| <b>V257_K258<br/>insGG</b>          | V257_K258ins<br>GG_fw     | GGATTTGTCCCAAGTAGGTGGTAAGTTACCGTCAAGTGG                   |
|                                     | V257_K258ins<br>GG_rv     | CCACTTGACGGTAACTTACCACCTACTTGGGACAAATCC                   |
| <b>V257_K258<br/>insGGG</b>         | V257_K258ins<br>GGG_fw    | GGATTTGTCCCAAGTAGGTGGTGGTAAGTTACCGTCAAGTGG                |
|                                     | V257_K258ins<br>GGG_rv    | CCACTTGACGGTAACTTACCACCACCTACTTGGGACAAATCC                |
| <b>V257_K258<br/>insGGGG</b>        | V257_K258ins<br>GGGG_fw   | GGATTTGTCCCAAGTAGGTGGTGGTGGTAAGTTACCGTCAAGTGG             |
|                                     | V257_K258ins<br>GGGG_rv   | CCACTTGACGGTAACTTACCACCACCACCTACTTGGGACAAATCC             |
| <b>V257_K258<br/>insGGGGG</b>       | V257_K258ins<br>GGGGG_fw  | GGATTTGTCCCAAGTAGGTGGTGGTGGTGGTAAGTTACCGTCAAGTG<br>G      |
|                                     | V257_K258ins<br>GGGGG_rv  | CCACTTGACGGTAACTTACCACCACCACCACCTACTTGGGACAAATC<br>C      |
| <b>V257_K258<br/>insGGGGG<br/>G</b> | V257_K258ins<br>GGGGGG_fw | GGATTTGTCCCAAGTAGGTGGTGGTGGTGGTGGTAAGTTACCGTCAA<br>GTGG   |
|                                     | V257_K258ins<br>GGGGGG_rv | CCACTTGACGGTAACTTACCACCACCACCACCACCTACTTGGGACAA<br>ATCC   |
| <b>V257_K258<br/>insGS</b>          | V257_K258ins<br>GS_fw     | GGATTTGTCCCAAGTAGGTTCTAAGTTACCGTCAAGTGG                   |
|                                     | V257_K258ins<br>GS_rv     | CCACTTGACGGTAACTTAGAACCTACTTGGGACAAATCC                   |
| <b>V257_K258<br/>insGSG</b>         | V257_K258ins<br>GSG_fw    | GGATTTGTCCCAAGTAGGTTCTGGTAAGTTACCGTCAAGTGG                |
|                                     | V257_K258ins<br>GSG_rv    | CCACTTGACGGTAACTTAGAACCCAGATACTTGGGACAAATCC               |
| <b>V257_K258<br/>insGSGS</b>        | V257_K258ins<br>GSGS_fw   | GGATTTGTCCCAAGTAGGTTCTGGTCTAAGTTACCGTCAAGTGG              |
|                                     | V257_K258ins<br>GSGS_rv   | CCACTTGACGGTAACTTAGAACCCAGAACCCTACTTGGGACAAATCC           |
| <b>V257_K258<br/>insGSGSG</b>       | V257_K258ins<br>GSGSG_fw  | GGATTTGTCCCAAGTAGGTTCTGGTCTGGTAAGTTACCGTCAAGTG<br>G       |
|                                     | V257_K258ins<br>GSGSG_rv  | CCACTTGACGGTAACTTAGAACCCAGAACCAGATACTTGGGACAAATC<br>C     |
| <b>V257_K258<br/>insGSGSG<br/>S</b> | V257_K258ins<br>GSGSGS_fw | GGATTTGTCCCAAGTAGGTTCTGGTCTGGTCTAAGTTACCGTCAA<br>GTGG     |
|                                     | V257_K258ins<br>GSGSGS_rv | CCACTTGACGGTAACTTAGAACCCAGAACCAGAACCCTACTTGGGACAA<br>ATCC |
| <b>V257_K258<br/>insPA</b>          | V257_K258ins<br>PA_fw     | GGATTTGTCCCAAGTACCGGCAAAGTTACCGTCAAGTGG                   |
|                                     | V257_K258ins<br>PA_rv     | CCACTTGACGGTAACTTTGCCGGTACTTGGGACAAATCC                   |
| <b>V257_K258<br/>insPAP</b>         | V257_K258ins<br>PAP_fw    | GGATTTGTCCCAAGTACCGGCACCGAAGTTACCGTCAAGTGG                |
|                                     | V257_K258ins<br>PAP_rv    | CCACTTGACGGTAACTTCGGTGCCGGTACTTGGGACAAATCC                |

|                                                 |                                        |                                                                 |
|-------------------------------------------------|----------------------------------------|-----------------------------------------------------------------|
| <b>V257_K258</b><br><b>insPAPA</b>              | V257_K258ins                           | GGATTTGTCCCAAGTACCGGCACCGGCACCGCAAAGTTACCGTCAAGTGG              |
|                                                 | PAPA_fw<br>V257_K258ins<br>PAPA_rv     | CCACTTGACGGTAACTTTGCCGGTGCCGGTACTTGGGACAAATCC                   |
| <b>V257_K258</b><br><b>insPAPAP</b>             | V257_K258ins                           | GGATTTGTCCCAAGTACCGGCACCGGCACCGAAGTTACCGTCAAGTG                 |
|                                                 | PAPAP_fw<br>V257_K258ins<br>PAPAP_rv   | G<br>CCACTTGACGGTAACTTCGGTGCCGGTGCCGGTACTTGGGACAAATC<br>C       |
| <b>V257_K258</b><br><b>insPAPAP</b><br><b>A</b> | V257_K258ins                           | GGATTTGTCCCAAGTACCGGCACCGGCACCGCAAAGTTACCGTCAA                  |
|                                                 | PAPAPA_fw<br>V257_K258ins<br>PAPAPA_rv | GTGG<br>CCACTTGACGGTAACTTTGCCGGTGCCGGTGCCGGTACTTGGGACAA<br>ATCC |
| <b>V257_K258</b><br><b>insGP</b>                | V257_K258ins                           | GGATTTGTCCCAAGTAGGTCCGAAGTTACCGTCAAGTGG                         |
|                                                 | GP_fw<br>V257_K258ins<br>GP_rv         | CCACTTGACGGTAACTTCGGACCTACTTGGGACAAATCC                         |
| <b>V257_K258</b><br><b>insGPG</b>               | V257_K258ins                           | GGATTTGTCCCAAGTAGGTCCGGGTAAAGTTACCGTCAAGTGG                     |
|                                                 | GPG_fw<br>V257_K258ins<br>GPG_rv       | CCACTTGACGGTAACTTACCCGGACCTACTTGGGACAAATCC                      |
| <b>V257_K258</b><br><b>insGPGP</b>              | V257_K258ins                           | GGATTTGTCCCAAGTAGGTCCGGGTCCGAAGTTACCGTCAAGTGG                   |
|                                                 | GPGP_fw<br>V257_K258ins<br>GPGP_rv     | CCACTTGACGGTAACTTCGGACCCGGACCTACTTGGGACAAATCC                   |
| <b>V257_K258</b><br><b>insGPGPG</b>             | V257_K258ins                           | GGATTTGTCCCAAGTAGGTCCGGGTCCGGGTAAAGTTACCGTCAAGTG                |
|                                                 | GPGPG_fw<br>V257_K258ins<br>GPGPG_rv   | G<br>CCACTTGACGGTAACTTACCCGGACCCGGACCTACTTGGGACAAATC<br>C       |
| <b>V257_K258</b><br><b>insGPGPG</b><br><b>P</b> | V257_K258ins                           | GGATTTGTCCCAAGTAGGTCCGGGTCCGGGTCCGAAGTTACCGTCAA                 |
|                                                 | GPGPGP_fw<br>V257_K258ins<br>GPGPGP_rv | GTGG<br>CCACTTGACGGTAACTTCGGACCCGGACCCGGACCTACTTGGGACAA<br>ATCC |



|                                                 |              |                       |                                          |
|-------------------------------------------------|--------------|-----------------------|------------------------------------------|
| <b>F278_N279</b><br><b>insPAPA</b>              | F278_N279ins | GGACATGGGACCGGCTGGTTC | CCCGGCACCGGCAAATGACGATTTTCGC             |
|                                                 | PAPA_fw      | ACTTC                 |                                          |
|                                                 | F278_N279ins | GAAGTGC               | GAAATCGTCATTTGCCGGTGCCGGGAACCAGCCGGTCCCA |
|                                                 | PAPA_rv      | TGTCC                 |                                          |
| <b>F278_N279</b><br><b>insPAPAP</b>             | F278_N279ins | GGACATGGGACCGGCTGGTTC | CCCGGCACCGGCAATGACGATTT                  |
|                                                 | PAPAP_fw     | CGCACTTC              |                                          |
|                                                 | F278_N279ins | GAAGTGC               | GAAATCGTCATTCGGTGCCGGTGCCGGGAACCAGCCGGTC |
|                                                 | PAPAP_rv     | CCATGTCC              |                                          |
| <b>F278_N279</b><br><b>insPAPAP</b><br><b>A</b> | F278_N279ins | GGACATGGGACCGGCTGGTTC | CCCGGCACCGGCAAATGACGA                    |
|                                                 | PAPAPA_fw    | TTTCGCACTTC           |                                          |
|                                                 | F278_N279ins | GAAGTGC               | GAAATCGTCATTTGCCGGTGCCGGTGCCGGGAACCAGCCG |
|                                                 | PAPAPA_rv    | GTCCCATGTCC           |                                          |
| <b>F278_N279</b><br><b>insGP</b>                | F278_N279ins | GGACATGGGACCGGCTGGTTC | CGGTCCGAATGACGATTTTCGCACTTC              |
|                                                 | GP_fw        |                       |                                          |
|                                                 | F278_N279ins | GAAGTGC               | GAAATCGTCATTCGGACCGAACCAGCCGGTCCCATGTCC  |
|                                                 | GP_rv        |                       |                                          |
| <b>F278_N279</b><br><b>insGPG</b>               | F278_N279ins | GGACATGGGACCGGCTGGTTC | CGGTCCGGGTAATGACGATTTTCGCACT             |
|                                                 | GPG_fw       | TC                    |                                          |
|                                                 | F278_N279ins | GAAGTGC               | GAAATCGTCATTACCCGGACCGAACCAGCCGGTCCCATGT |
|                                                 | GPG_rv       | CC                    |                                          |
| <b>F278_N279</b><br><b>insGPGP</b>              | F278_N279ins | GGACATGGGACCGGCTGGTTC | CGGTCCGGGTCCGAATGACGATTTTCGC             |
|                                                 | GPGP_fw      | ACTTC                 |                                          |
|                                                 | F278_N279ins | GAAGTGC               | GAAATCGTCATTCGGACCCGGACCGAACCAGCCGGTCCCA |
|                                                 | GPGP_rv      | TGTCC                 |                                          |
| <b>F278_N279</b><br><b>insGPGPG</b>             | F278_N279ins | GGACATGGGACCGGCTGGTTC | CGGTCCGGGTCCGGGTAATGACGATTT              |
|                                                 | GPGPG_fw     | CGCACTTC              |                                          |
|                                                 | F278_N279ins | GAAGTGC               | GAAATCGTCATTACCCGGACCCGGACCGAACCAGCCGGTC |
|                                                 | GPGPG_rv     | CCATGTCC              |                                          |
| <b>F278_N279</b><br><b>insGPGPG</b><br><b>P</b> | F278_N279ins | GGACATGGGACCGGCTGGTTC | CGGTCCGGGTCCGGGTCCGAATGACGA              |
|                                                 | GPGPGP_fw    | TTTCGCACTTC           |                                          |
|                                                 | F278_N279ins | GAAGTGC               | GAAATCGTCATTCGGACCCGGACCCGGACCGAACCAGCCG |
|                                                 | GPGPGP_rv    | GTCCCATGTCC           |                                          |

**Supplementary Table 21: Site-directed mutagenesis primers used for the LILI library after position Q286.**

| <b>Mutation</b>                     | <b>Name</b>               | <b>Sequence (5' → 3')</b>                                       |
|-------------------------------------|---------------------------|-----------------------------------------------------------------|
| <b>Q286_A287<br/>insGG</b>          | Q286_A287ins<br>GG_fw     | GACGATTTTCGCACTTCTGCAAGGTGGTGCCATCATGGGTCCTAAGG                 |
|                                     | Q286_A287ins<br>GG_rv     | CCTTAGGACCCATGATGGCACCACCTTGCAGAAGTGCGAAATCGTC                  |
| <b>Q286_A287<br/>insGGG</b>         | Q286_A287ins<br>GGG_fw    | GACGATTTTCGCACTTCTGCAAGGTGGTGCCATCATGGGTCCTAA<br>GG             |
|                                     | Q286_A287ins<br>GGG_rv    | CCTTAGGACCCATGATGGCACCACCACCTTGCAGAAGTGCGAAATCG<br>TC           |
| <b>Q286_A287<br/>insGGGG</b>        | Q286_A287ins<br>GGGG_fw   | GACGATTTTCGCACTTCTGCAAGGTGGTGCCATCATGGGTC<br>TAAGG              |
|                                     | Q286_A287ins<br>GGGG_rv   | CCTTAGGACCCATGATGGCACCACCACCACCTTGCAGAAGTGCGAAA<br>TCGTC        |
| <b>Q286_A287<br/>insGGGGG</b>       | Q286_A287ins<br>GGGGG_fw  | GACGATTTTCGCACTTCTGCAAGGTGGTGCCATCATGGG<br>TCCTAAGG             |
|                                     | Q286_A287ins<br>GGGGG_rv  | CCTTAGGACCCATGATGGCACCACCACCACCACCTTGCAGAAGTGCG<br>AAATCGTC     |
| <b>Q286_A287<br/>insGGGGG<br/>G</b> | Q286_A287ins<br>GGGGGG_fw | GACGATTTTCGCACTTCTGCAAGGTGGTGCCATCATGGG<br>GGGTCCTAAGG          |
|                                     | Q286_A287ins<br>GGGGGG_rv | CCTTAGGACCCATGATGGCACCACCACCACCACCACCTTGCAGAAGT<br>GCGAAATCGTC  |
| <b>Q286_A287<br/>insGS</b>          | Q286_A287ins<br>GS_fw     | GACGATTTTCGCACTTCTGCAAGGTTCTGCCATCATGGGTCCTAAGG                 |
|                                     | Q286_A287ins<br>GS_rv     | CCTTAGGACCCATGATGGCAGAACCTTGCAGAAGTGCGAAATCGTC                  |
| <b>Q286_A287<br/>insGSG</b>         | Q286_A287ins<br>GSG_fw    | GACGATTTTCGCACTTCTGCAAGGTTCTGGTGCCATCATGGGTCCTAA<br>GG          |
|                                     | Q286_A287ins<br>GSG_rv    | CCTTAGGACCCATGATGGCACCAGAACCTTGCAGAAGTGCGAAATCG<br>TC           |
| <b>Q286_A287<br/>insGSGS</b>        | Q286_A287ins<br>GSGS_fw   | GACGATTTTCGCACTTCTGCAAGGTTCTGGTTCTGCCATCATGGGTC<br>TAAGG        |
|                                     | Q286_A287ins<br>GSGS_rv   | CCTTAGGACCCATGATGGCAGAACCAGAACCTTGCAGAAGTGCGAAA<br>TCGTC        |
| <b>Q286_A287<br/>insGSGSG</b>       | Q286_A287ins<br>GSGSG_fw  | GACGATTTTCGCACTTCTGCAAGGTTCTGGTTCTGGTGCCATCATGGG<br>TCCTAAGG    |
|                                     | Q286_A287ins<br>GSGSG_rv  | CCTTAGGACCCATGATGGCACCAGAACCAGAACCTTGCAGAAGTGCG<br>AAATCGTC     |
| <b>Q286_A287<br/>insGSGSG<br/>S</b> | Q286_A287ins<br>GSGSGS_fw | GACGATTTTCGCACTTCTGCAAGGTTCTGGTTCTGGTTCTGCCATCAT<br>GGGTCCTAAGG |
|                                     | Q286_A287ins<br>GSGSGS_rv | CCTTAGGACCCATGATGGCAGAACCAGAACCAGAACCTTGCAGAAGT<br>GCGAAATCGTC  |
| <b>Q286_A287<br/>insPA</b>          | Q286_A287ins<br>PA_fw     | GACGATTTTCGCACTTCTGCAACCAGCCATCATGGGTCCTAAGG                    |
|                                     | Q286_A287ins<br>PA_rv     | CCTTAGGACCCATGATGGCTGCCGGTTGCAGAAGTGCGAAATCGTC                  |
| <b>Q286_A287<br/>insPAP</b>         | Q286_A287ins<br>PAP_fw    | GACGATTTTCGCACTTCTGCAACCAGCCATCATGGGTCCTAA<br>GG                |
|                                     | Q286_A287ins<br>PAP_rv    | CCTTAGGACCCATGATGGCCGGTGCCGGTTGCAGAAGTGCGAAATCG<br>TC           |

|                                                 |              |                                                   |
|-------------------------------------------------|--------------|---------------------------------------------------|
| <b>Q286_A287</b><br><b>insPAPA</b>              | Q286_A287ins | GACGATTTTCGCACTTCTGCAACCGGCACCGGCAGCCATCATGGGTCC  |
|                                                 | PAPA_fw      | TAAGG                                             |
|                                                 | Q286_A287ins | CCTTAGGACCCATGATGGCTGCCGGTGCCGGTTGCAGAAGTGCGAAA   |
|                                                 | PAPA_rv      | TCGTC                                             |
| <b>Q286_A287</b><br><b>insPAPAP</b>             | Q286_A287ins | GACGATTTTCGCACTTCTGCAACCGGCACCGGCACCGGCCATCATGGG  |
|                                                 | PAPAP_fw     | TCCTAAGG                                          |
|                                                 | Q286_A287ins | CCTTAGGACCCATGATGGCCGGTGCCGGTGCCGGTTGCAGAAGTGC    |
|                                                 | PAPAP_rv     | AAATCGTC                                          |
| <b>Q286_A287</b><br><b>insPAPAP</b><br><b>A</b> | Q286_A287ins | GACGATTTTCGCACTTCTGCAACCGGCACCGGCACCGGCAGCCATCAT  |
|                                                 | PAPAPA_fw    | GGGTCCTAAGG                                       |
|                                                 | Q286_A287ins | CCTTAGGACCCATGATGGCTGCCGGTGCCGGTGCCGGTTGCAGAAGT   |
|                                                 | PAPAPA_rv    | GCGAAATCGTC                                       |
| <b>Q286_A287</b><br><b>insGP</b>                | Q286_A287ins | GACGATTTTCGCACTTCTGCAAGGTCCGGCCATCATGGGTCCCTAAGG  |
|                                                 | GP_fw        |                                                   |
|                                                 | Q286_A287ins | CCTTAGGACCCATGATGGCCGGACCTTGCAGAAGTGCGAAATCGTC    |
|                                                 | GP_rv        |                                                   |
| <b>Q286_A287</b><br><b>insGPG</b>               | Q286_A287ins | GACGATTTTCGCACTTCTGCAAGGTCCGGGTGCCATCATGGGTCCCTAA |
|                                                 | GPG_fw       | GG                                                |
|                                                 | Q286_A287ins | CCTTAGGACCCATGATGGCACCCGGACCTTGCAGAAGTGCGAAATCG   |
|                                                 | GPG_rv       | TC                                                |
| <b>Q286_A287</b><br><b>insGPGP</b>              | Q286_A287ins | GACGATTTTCGCACTTCTGCAAGGTCCGGGTCCGGCCATCATGGGTCC  |
|                                                 | GPGP_fw      | TAAGG                                             |
|                                                 | Q286_A287ins | CCTTAGGACCCATGATGGCCGGACCCGGACCTTGCAGAAGTGCGAAA   |
|                                                 | GPGP_rv      | TCGTC                                             |
| <b>Q286_A287</b><br><b>insGPGPG</b>             | Q286_A287ins | GACGATTTTCGCACTTCTGCAAGGTCCGGGTCCGGGTGCCATCATGGG  |
|                                                 | GPGPG_fw     | TCCTAAGG                                          |
|                                                 | Q286_A287ins | CCTTAGGACCCATGATGGCACCCGGACCCGGACCTTGCAGAAGTGC    |
|                                                 | GPGPG_rv     | AAATCGTC                                          |
| <b>Q286_A287</b><br><b>insGPGPG</b><br><b>P</b> | Q286_A287ins | GACGATTTTCGCACTTCTGCAAGGTCCGGGTCCGGGTCCGGCCATCAT  |
|                                                 | GPGPGP_fw    | GGGTCCTAAGG                                       |
|                                                 | Q286_A287ins | CCTTAGGACCCATGATGGCCGGACCCGGACCCGGACCTTGCAGAAGT   |
|                                                 | GPGPGP_rv    | GCGAAATCGTC                                       |



## NMR spectra

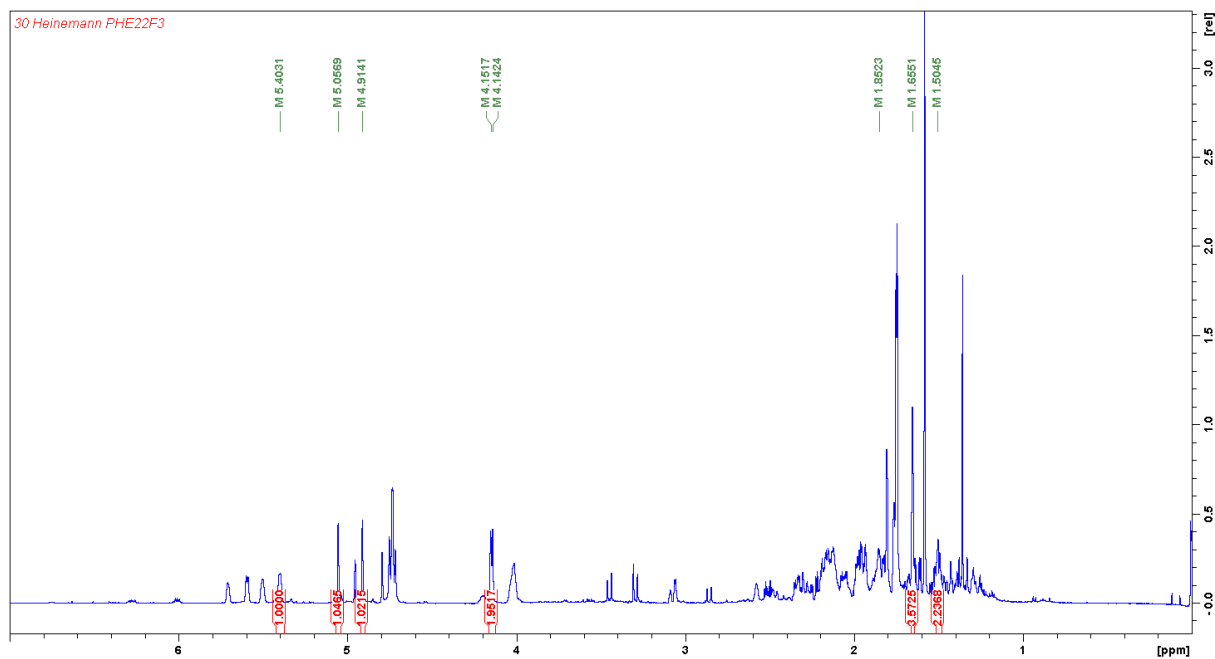

Supplementary Fig. 29:  $^1\text{H}$ -NMR of the product of the synthesis of (+)-mentha-1.8-dien-10-ol **2b** in  $\text{CDCl}_3$

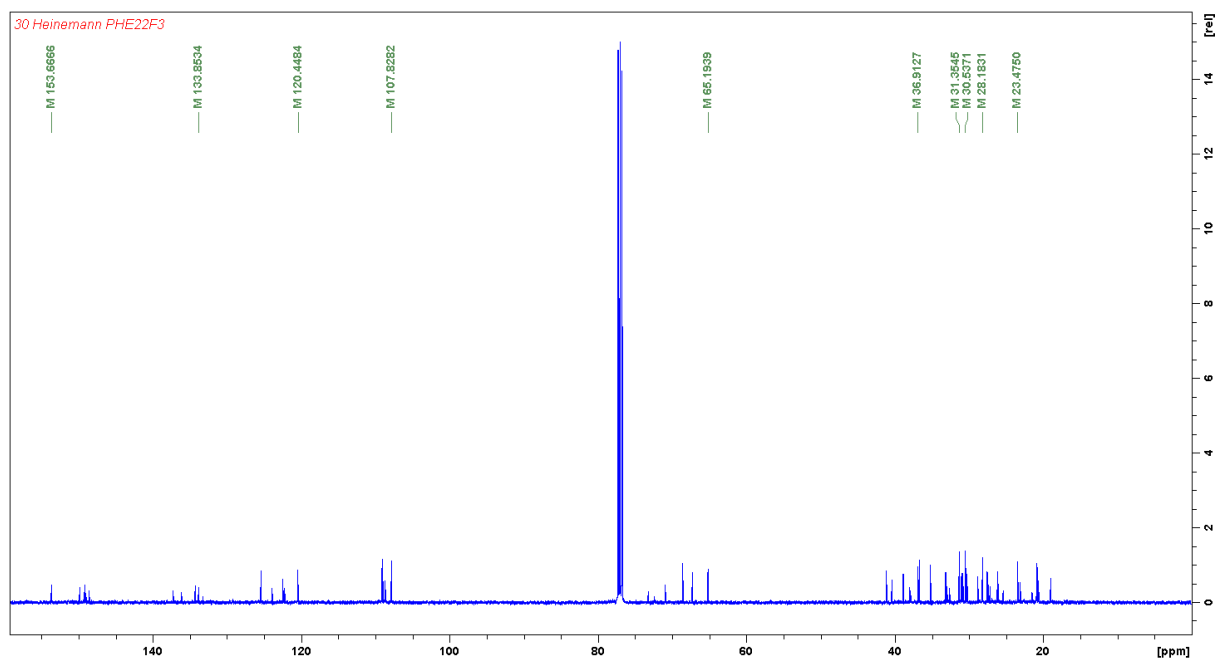

Supplementary Fig. 30:  $^{13}\text{C}$ -NMR of the product of the synthesis of (+)-mentha-1.8-dien-10-ol **2b** in  $\text{CDCl}_3$

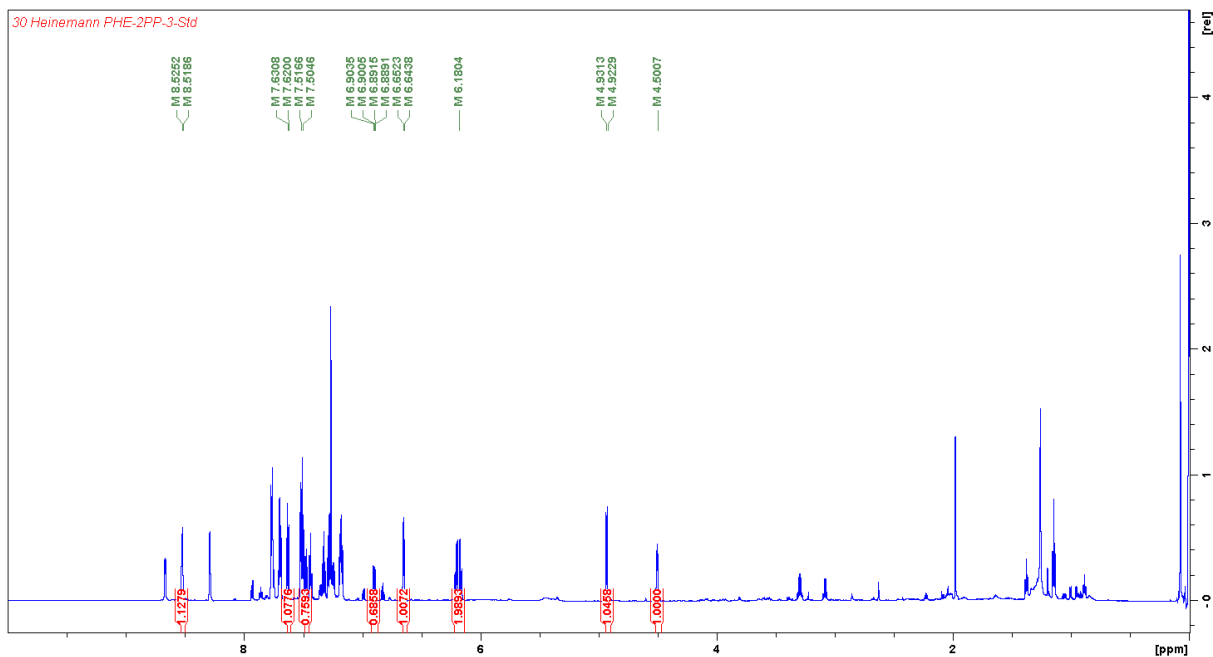

Supplementary Fig. 31:  $^1\text{H}$ -NMR of the in-house standard of 1,2-dihydroxy-3-(2'-pyridyl)-cyclohexa-3,5-diene 3a.

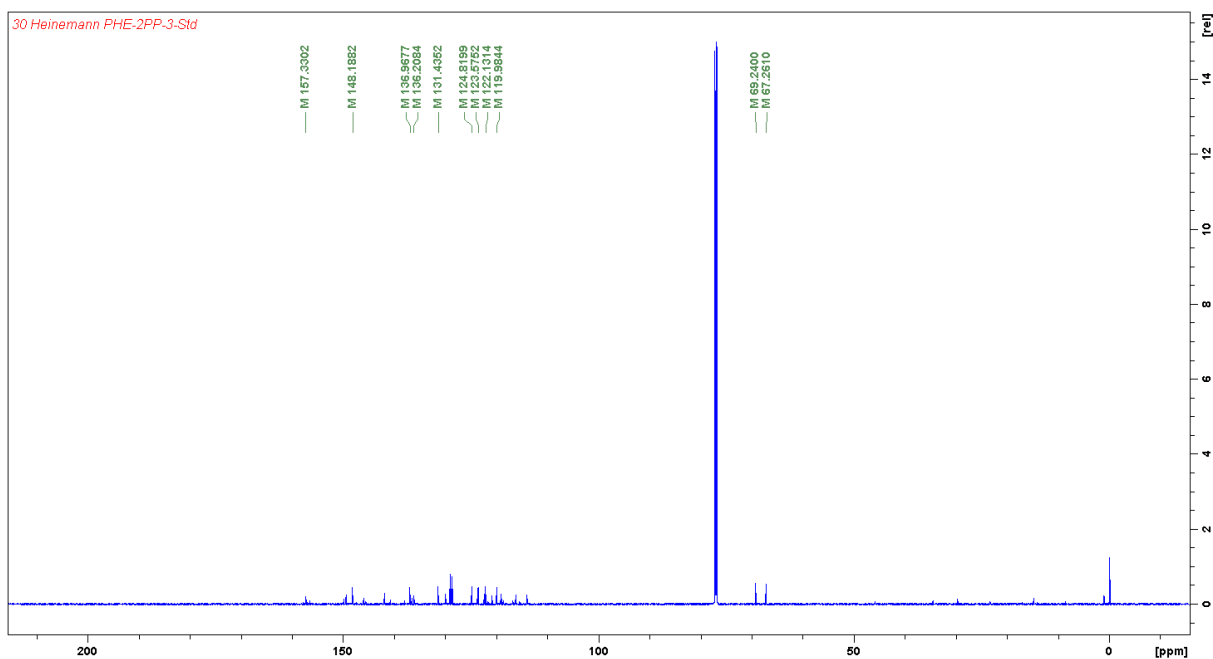

Supplementary Fig. 32:  $^{13}\text{C}$ -NMR of the in-house standard of 1,2-dihydroxy-3-(2'-pyridyl)-cyclohexa-3,5-diene 3a.

## Sequence of the Cumene Dioxygenase from *Pseudomonas fluorescens* IP01

CDO gene cluster (GenBank: D37828.1)<sup>11</sup>

**cumA1** (Oxygenase  $\alpha$ -subunit) → **cumA2** (Oxygenase  $\beta$ -subunit) → **cumA3** (Ferredoxin) → **cumA4** (Reductase)

Overlapping sequence space between cumA3 and cumA4 is underlined.

```
ATGAGTTCAATAATAAATAAAGAAGTGCAGGAAGCCCTTTGAAATGGGTGAAAACTGGTCTGACGAGGAGATTAAGCGCT
CGTTGATGAGGAAAAGGGGTGCTTGATCCACGATTTTTCTCTGATCAGGATTTGTATGAGATCGAGCTTGAGAGGGTGTG
CTCGATCCTGGCTGCTTGGGCACGAGGGGCACATTCCAAAGCCGGGATTATCTGACCACCTACATGGGTGAAGACCCA
GTAATTGTAGTGAGGCAGAAAGACCGGAGCATTAAAGTCTTTTTAAACCAATGTCGGCATCGCGGTATGCGTATTGAGCGATC
GGATTTGGCAACGCAAAGTCATTTACCTGCACTTATCACGGGTGGGCTATGACACCGCCGTAATCTGGTCAATGTACCCCT
ACGAGAAAGAGGCTTTTTGTGACAAAAAGAGGGTACTGCGGGTTCGACAAGGCCGACTGGGGGCCGTGCAAGCGCGGGTG
GATACTTACAAGGGCTGATTTTTGCCAACCTGGGATACCGAAGCCCTGATTTGAAGACCTATCTGAGCGATGCAACACCTA
TATGGACGTGATGCTCGATCGGACCGAGGCAGTTACTCAGGTCAACCCGGTATGCAAAAACGCGTAATCCCTGTAACCTGGA
AATTCGCGCCGAGCAATCTGTAGCGATATGTACCATGCGGGAACGATGGCGCATCTTTCAGGTGTATTGTCCAGCCTCCCG
CCTGAAATGGATTTGTCCTCAAGTAAAGTTACCGTCAAGTGGGAATCAGTTCCGGGCTAAGTGGGGTGGACATGGGACCGCTG
GTTCAATGACGATTTGCGCACTTCTGCAAGCCATCATGGGTCTAAGGTTGTGCGATTACTGGACCAAAGGTCACAGCTGCTGAGC
GTGCAAAAAGAGCGTCTGGGTAAGTCTTCCGGCTGATCGCATGGTTGCTCAGCATATGACCATTTTTCCGACATGCTCATT
CTTCTGGCATCAATACAGTCCGTAATTTGGCACCACGTTGGCCCTAATGAGATCGAAGTTTGGTCTTTCATCGTAGTGGATGC
TGATGCACCTGAAGATATCAAGGAAGAATATCGTCCGAAAAACATCTTCACCTCAATCAAGGGGGAACCTACGAGCAGGACG
ATGGCGAAAACCTGGGTGGAGGTTACGCGGGGATTCGCGGGCTACAAGGCTAGAAGTAGACCTCTTTGTGCCAGATGGGGCGG
GGTGTGCCAAACAAGAAACAACCCGGAGTTTCTGGAAAAGACCAGTACGTTTATAGCGAAGAAGCTCGCGGAGGGTCTACCA
CCACTGGAGCCGCATGATGTCGAGCCGAGTTGGGACACGCTAAAGTCTTGAGCAGATAAAGTGACCGAAAAAAGCAATCACT
TTCATCGGGTTTCTACCGTGGTAGACAAGGGTTTAGCCTGTTTTTGGTTGCTGGAAGTGCCTAAGTGAATTGATTAACCTGG
GTAAACCCCTGGCTTTGTGCGGGGTATTTACTCGGGTGCATTCCAAATGTACAGCTGTGCGTTTGGTGATAATCGTCATGCT
ATGGATTTGCTATTTGCATGAGCCGAGTGCAGGTGCGCCAACATATATACAGGAACTAATTATGACATCCGCTGATTTGACA
AAACCCATCGAGTGGCCAGAAATGCCCGTCAGTCTTGAATTGCAAAATGCCGTTGAGCAATTTACTATCGCGAAGCACAGTT
GCTTGATATCAAACATGATGAGGCTGGCTGGCTTTACTGACCAAGACATCCAATATGGATGCCAATTCGTACTCTACTCATA
ATCCCGGAATAAGCGATGAGTACGTTGCCCCCGGTAAGTCCCATTTTACGAGACGATGAGAGCAGTATGAGTCTGCGCGC
ATTCGGGCGAGGTTTTCGGGGCTTAACTGGACTGAAGTCCACCGTCCGCGCAGCCGGCACATTGTAAGCAACGTTATCGTCCG
CGAACTGAGAGTCTGGTACTTTGGAAGTAGTTCTGCGTTCCTTTGTACCCTAATCGATTGGAGCGTATGACGGACATCT
ATGTCGGTGAGCGTCGAGATATTTGCTCCGTGTAAGTACGCGGGTGGGATTCAAAATGCCAAGCGAACGATCTTGCTCGAC
CAGAGCACGATTACAGCGAATAATCTCAGCCAGTTTTTCTAACTAGGGAATGCTGGCCACTTACCCTATACCCAGCCTATTC
TGAGAGCGGCCTGAAAATGAAGAGGAGCTACCCGATAGCTACGCAAACTAATCGCGCTCGCCCTTCTCTGATCGCGATCGGTA
CTTTTACTTGGCCAACTCTCCTCGGACTTTGCATTTACAGCAGCTGCGGCTGTTCGGCATGATGTATTCGGGTGTGGATTTG
CAGGTCGGCGCTCCGGTATTACCCCTGCTGCAGGATGCTTGGGCCGTAGTTCGGGCTGACGCTGGGGGGCACTGGGCTGGTTG
GTTGTGGGGCGCACGTCAGCCCGTGCCTTCATGGCGGTTGTCCCGTGGTTCATCGTCACGGAAGTGTGCGACGGTATCTGGG
ACTTGTACAGCATCGTTTGGAGTACGAAAGCCATGTGGTTCGGGCTCCTGACGTTCCGCATCCACGTTGGTGTGGATCGTCTGG
GGTTACAGGTATGGCGCGTGTGCTCTGCGCGGTATCTGGCTTAAACGTCCTCAACCTCCTGAATCTGTGGCCTGAATTGAA
CTCTGTCAATTTCCCATGCGCGTGCAGCTTATCCGGCGCTTGCGCCAAGCTGGCTGCCGATTTAATGAGTAGTTAAAGTTAG
CTATAGAAACTCTGAAAAAGGCTTACCTCATGAGATATCCAGTCTGCAGTCCGCGTGGTTACTGGCGTGCATTTTCCGAGTG
CGTACTTTTTAGACCAACTCTATAATAAGAGACAAAAAGAATGACTTTTTTCAAAGTTTGTGAAGTATCTGATGTGCCCGT
CGGTGACGCTTGCAGGTTGAAAGTAAAGGCGAAGCCGTCGCGATTTTCAACGTCGATGGAGAGTTGTTTCGCAACACAGGACC
GTTGCACTCATGGTACTGGTCTTGTCCGAAGCGGCTACCTAGAGGGTGACATTTGTCGAATGCTCGTGCACATGGGTAGG
TTCTGTGTCCGCACGGCAAGGTAAGGACAGCACCCGCTGTGAGCCGCTGAAGATATATCCGATTCGAATAGATGGCAGCGA
TGTGTTTCGTAGACTTTGATGCCGGGTATCTAGCGCCATGATTAATCAATCGTCATTATTTGGTGCTGGCTTGGCTGGCGAAC
TGCCACTCGCTATCTTCGCGCCCAAGGATATCAGGGAAAGATCCATCTGGTTCGGGGAGGAGTTGCATGTGGCTTACGATCGCC
CCTCCTTATCCAAGGACACCCGTGTCAGGAAAAGTGGTTCGAACCACCCGCAATCCTGGATCCTTGTGGTATGCATCGGCCGAT
ATAGATCTCCATTTAGGTGTACCGGTGACCGGTATTGATGTGTGTAACCACCCAGGTACTTTTCAATCCGGTGACATTTCTAGC
CTACGACCGACTGCTATTAGCCACCGCGCTCGCGCGCGGCTATGGCTATTACGGGAAGCGAGTTGGCCGGCATTACACCT
TGCGTGACCGCGCCGACAGCCAGGCGCTGAGGCAGGCGCTTGAGCCGGGCCAGTCTCTGGTAATTGTCGGCGGTGGCCTGATC
GGTTGCGAAGTGGCGACCACTGCTATTAATGCCGGTGGCCAGTCACTGTTCTGGAGGCGGGGACGAACTGCTGTTGCGAGT
GCTAGGCCGATCAACCGGGGCTGGTGTGCAACGAGTTGGAGCGTTTGGGTGTCCGGTTGAACTGAACGCACAGGCAGCGC
ATTTTCGAGGGCGAGGGACAGTGCATGCCGTCGTTTGTGCCGATGGACGTCGGATAGCAGCTGGCACAGTTTTTGGTGAGCATC
GGTGCAAGCAGCCAGCAACTGGCAGCTGCGGCCGATTCGCATGTGAGCGCGGCTGGTAGTTGACGCTACGGGTGCAAG
CTCATGTCTCAGTATTTCGCGGCAAGTGCAGTACGCTAGCCCTGGCCCTGAGGTCCGGTGAACCTGCGCTCGCTGGAGACCTACC
TGAACAGCCACATGCAGGCTGAAACTGCCGCGCGGCCATGTTAGGCAAGTCTATCCCGGCTCTTACAGTGCCAACTCTTGG
ACGGAGATTGCAGGCATCGGATACAGATGGTTGGCGACATCGAAGGCCCGGAGAAGTTGTCTTGGCGGGTAACGTCGAGAA
TGGTCAGCCGCTGGTGCAGTTTCAAGGTTCTTGTATGTCGCGTTGAAGCCGCAACCGCTATCAATGCCCGGAAGATTTTCCCG
TTGCAACCCGATTTGGTGGCTGACCACATTCCTGTATCGGCCACAAAATTCAGGACGCTAGCTCTAACTTGGGGATTTTATG
AAAGCTAAAGCTGAGCGATGCGAGTGA
```

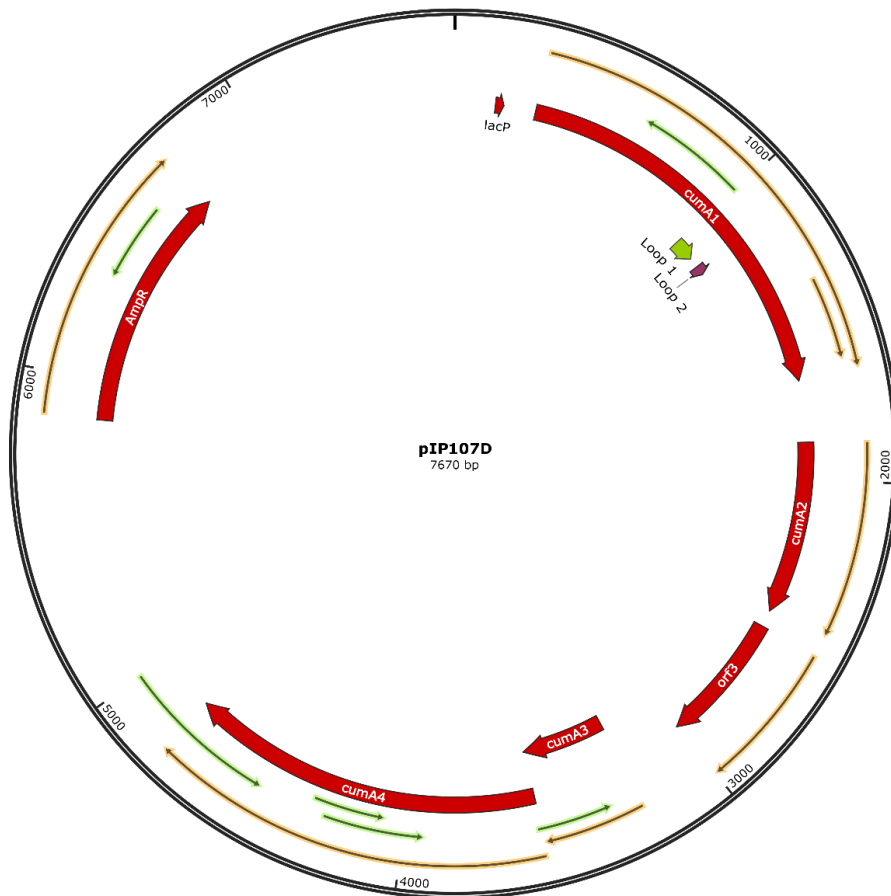

**Fig. 33: Plasmid map of pIP107D.<sup>1</sup>**

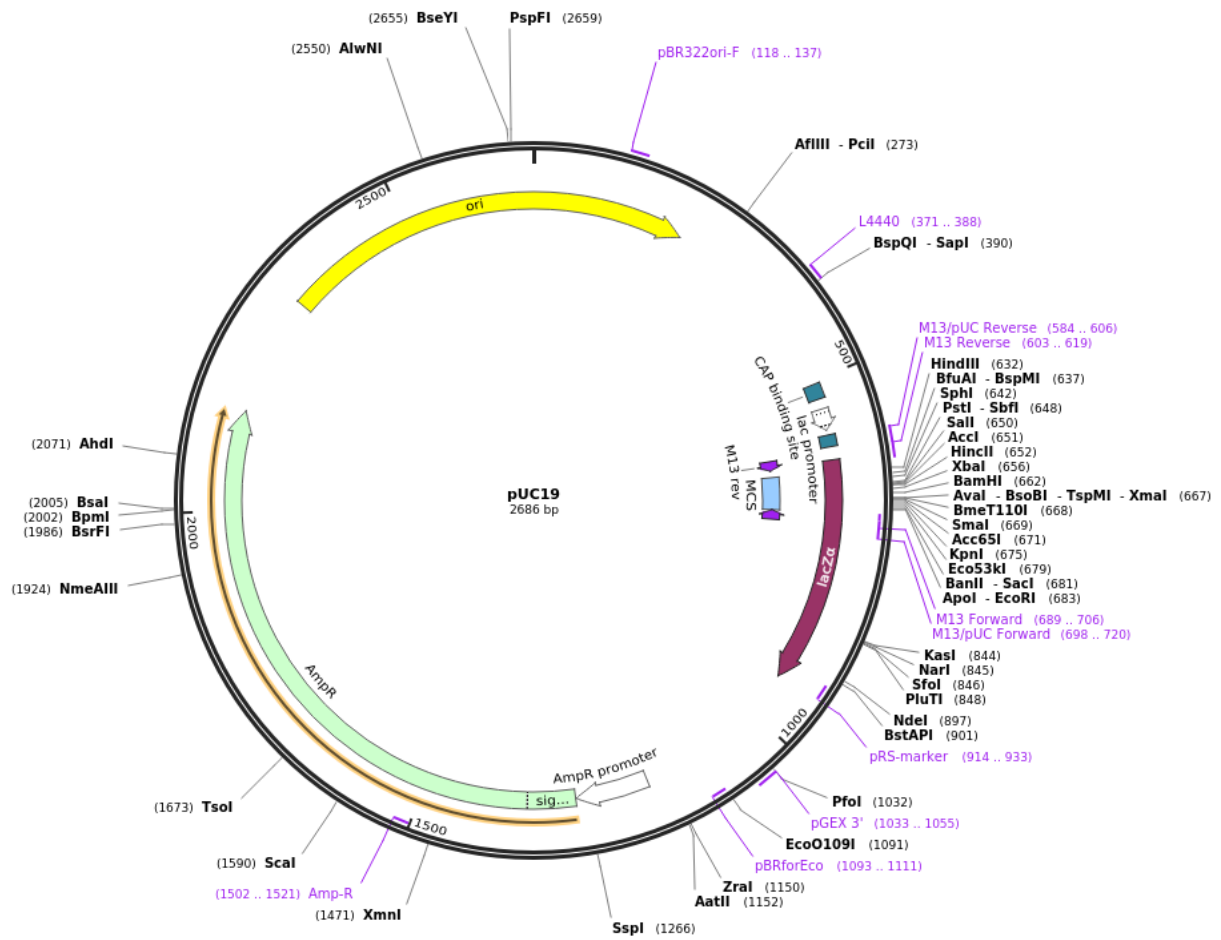

**Fig. 34: Plasmid map of pUC19.** (Source: <https://www.addgene.org/50005>, July 2020)

## Supplementary References

1. Gally, C., Nestl, B. M. & Hauer, B. Engineering Rieske Non-Heme Iron Oxygenases for the Asymmetric Dihydroxylation of Alkenes. *Angew. Chemie - Int. Ed.* **54**, 12952–12956 (2015).
2. Halder, J. M., Nestl, B. M. & Hauer, B. Semirational Engineering of the Naphthalene Dioxygenase from *Pseudomonas* sp. NCIB 9816-4 towards Selective Asymmetric Dihydroxylation. *ChemCatChem* **10**, 178–182 (2018).
3. Vila, M. A. *et al.* Site-Directed Mutagenesis Studies on the Toluene Dioxygenase Enzymatic System: Role of Phenylalanine 366, Threonine 365 and Isoleucine 324 in the Chemo-, Regio-, and Stereoselectivity. *Adv. Synth. Catal.* **359**, 2149–2157 (2017).
4. Groeneveld, M., van Beek, H. L., Duetz, W. A. & Fraaije, M. W. Identification of a novel oxygenase capable of regiospecific hydroxylation of D-limonene into (+)-trans-carveol. *Tetrahedron* **72**, 7263–7267 (2016).
5. Boyd, D. R. *et al.* Regioselectivity and stereoselectivity of dioxygenase catalysed cis-dihydroxylation of mono- and tri-cyclic azaarene substrates. *Org. Biomol. Chem.* **6**, 3957–3966 (2008).
6. Alan, B. & Bucher, W. Menthatrienes and the Oxidation of limonene. *Helv. Chim. Acta* **53**, 770–775 (1970).
7. Scanlon, J. T. & Willis, D. E. Calculation of flame ionization detector relative response factors using the effective carbon number concept. *J. Chromatogr. Sci.* **23**, 333–340 (1985).
8. Szulejko, J. E. & Kim, K. H. Re-evaluation of effective carbon number (ECN) approach to predict response factors of ‘compounds lacking authentic standards or surrogates’ (CLASS) by thermal desorption analysis with GC-MS. *Analytica Chimica Acta* vol. 851 14–22 (2014).
9. Bermejo, F. A., Rico-Ferreira, R., Bamidele-Sanni, S. & García-Granda, S. Total synthesis of (+)-ampullicin and (+)-isoampullicin: Two fungal metabolites with growth regulatory activity isolated from *Ampulliferina* sp. 27. *J. Org. Chem.* **66**, 8287–8292 (2001).

10. Dhulut, S. *et al.* Cyclic allyl carbamates in stereoselective syn SE' processes: Synthetic approach to sarcodictyins and eleutherobin. *European J. Org. Chem.* 5235–5243 (2007) doi:10.1002/ejoc.200700490.
11. Dong, X. *et al.* Crystal Structure of the Terminal Oxygenase Component of Cumene Dioxygenase from *Pseudomonas fluorescens* IP01. *J. Bacteriol.* **187**, 2483–2490 (2005).
